# Supplementary material for: Ring-expansion approach towards extended asymmetric benzopentafulvalenes: overcrowded olefinic structure and chain length-dependent properties
Source: Royal Society of Chemistry journal article supplement (doi:10.1039/d0qo00602e), 2020-01-01
Supplement: d0qo00602e1.pdf [file d0qo00602e1.pdf]

## Supporting Information

### **Ring-expansion Approach toward Extended Asymmetric Benzopentafulvalene: Overcrowded Olefinic Structure and Chain-length Dependent Property**

Xinhao Wang,<sup>a</sup> Zihong Zhang,<sup>a</sup> Jing Guo,<sup>b</sup> Chunyan Liu,<sup>a</sup> Yuanyuan Hu,<sup>b</sup> Huiping Xiao,<sup>c</sup> Sheng Xie,<sup>a</sup> Jishan Wu,<sup>d</sup> and Zebing Zeng<sup>\*a</sup>

<sup>a</sup>State Key Laboratory of Chemo/Biosensing and Chemometrics, College of Chemistry and Chemical Engineering, Hunan University, Changsha 410082, P. R. China

<sup>b</sup>Key Laboratory for Micro-Nano Optoelectronic Devices of Ministry of Education, School of Physics and Electronics, Hunan University, Changsha 410082, P. R. China

<sup>c</sup>School of Materials Science and Engineering Nanchang Hangkong University, Nanchang 330063, P. R. China

<sup>d</sup>Department of Chemistry National University of Singapore 3 Science Drive 3, 117543, Singapore  
E-mail: zbzeng@hnu.edu.cn

---

## Table of Contents

### Table of Contents

|                                                                                |           |
|--------------------------------------------------------------------------------|-----------|
| <b>Experimental Procedures</b> .....                                           | <b>3</b>  |
| <b>General method</b> .....                                                    | <b>3</b>  |
| <b>Synthetic procedures</b> .....                                              | <b>3</b>  |
| <b>Results and Discussion</b> .....                                            | <b>9</b>  |
| <b>X-ray crystallography of compound 3a</b> .....                              | <b>10</b> |
| <b>Theoretical calculations of reaction pathways</b> .....                     | <b>10</b> |
| <b>The aromatic proton resonances of NBF-Mes/DCP/PCP</b> .....                 | <b>11</b> |
| <b>The photophysical and electrochemical properties of new compounds</b> ..... | <b>11</b> |
| <b>Crystal packing of compound PBF-Mes and NBF-Mes</b> .....                   | <b>12</b> |
| <b>DFT and TD-DFT calculations</b> .....                                       | <b>12</b> |
| <b>Differential pulse voltammograms</b> .....                                  | <b>18</b> |
| <b>Characterization of NBF-PCP radical ions</b> .....                          | <b>19</b> |
| <b>OFET devices</b> .....                                                      | <b>21</b> |
| <b>Crystal data and Structural Refinement</b> .....                            | <b>22</b> |
| <b>NMR/mass spectra for new compounds</b> .....                                | <b>26</b> |
| <b>Computational results</b> .....                                             | <b>49</b> |
| <b>References</b> .....                                                        | <b>87</b> |

## Experimental Procedures

### General method

Solvents were purified and dried by standard methods prior to use. All commercially available reagents were used without further purification unless otherwise noted. Column chromatography was generally performed on silica gel (200 - 300 mesh) and reactions were monitored by thin layer chromatography (TLC) using silica gel GF254 plates with UV light to visualize the course of reaction.  $^1\text{H}$  NMR and  $^{13}\text{C}$  NMR data were recorded on a 400 MHz spectrometer at room temperature. All chemical shifts are quoted in ppm, relative to tetramethylsilane, using residual solvent peak as a reference standard. The following abbreviations were used to explain the multiplicities: s = singlet, d = doublet, t = triplet, q = quartet, m = multiplet. Cyclic voltammetry (CV) and differential pulse voltammetry (DPV) were performed on a Chenhua 650D electrochemical using a three-electrode cell with a glassy carbon working electrode, a platinum wire counter electrode, and an Ag/AgNO<sub>3</sub> or Ag/AgCl reference electrode in anhydrous solvents containing recrystallized tetrabutylammonium hexafluorophosphate (TBAPF<sub>6</sub>, 0.10 M) as supporting electrolyte at 298 K. The potential was externally calibrated against the ferrocene/ferrocenium couple. Absorption spectra were recorded on a Shimadzu UV-3600 plus. High-resolution mass spectra (HRMS) were recorded on a Finnigan MAT TSQ 7000 or an Agilent 1200-6520 Q-TOF mass spectrometer system operating in a MALDI-TOF mode. Electron spin resonance (ESR) spectra were performed on a JES-FA200 spectrometer.

### Synthetic procedures

#### Scheme S1. Preparation of starting materials 1a<sup>a</sup>-1e

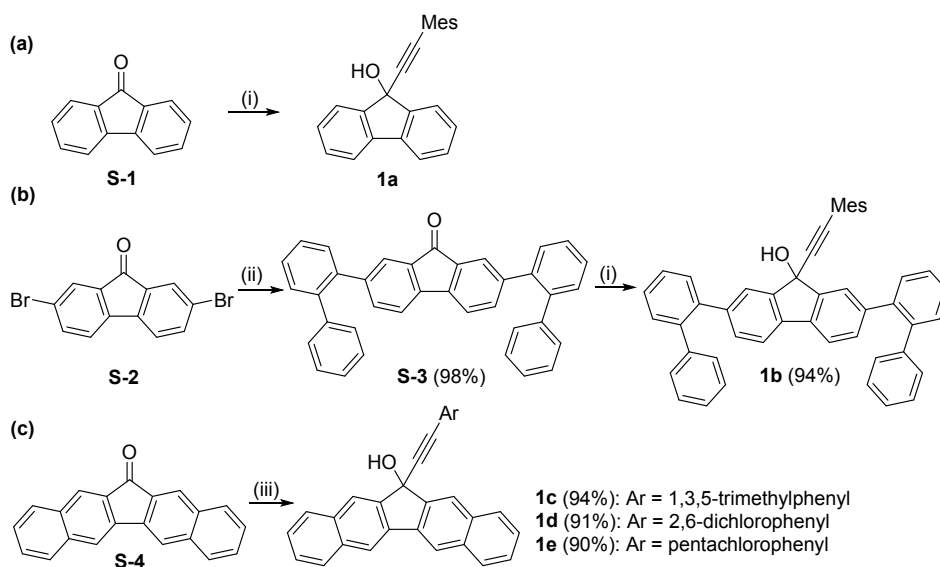

Reagent and conditions: (i) trimethylphenylalkynyl lithium, dry THF, -78 °C to r.t.; <sup>a</sup>Compound **1a** was synthesized according to our previous procedure.<sup>1</sup> (ii) 2-biphenylboronic acid, Pd(PPh<sub>3</sub>)<sub>4</sub>, aqueous K<sub>2</sub>CO<sub>3</sub> (2M), toluene, ethanol (1~2 mL), 80 °C. (iii) lithiated 1,3,5-trimethylphenyl/2,6-dichlorophenyl/pentachlorophenyl alkyne reagents,<sup>2</sup> dry THF, -78 °C to r.t

### Synthesis of compound S-3

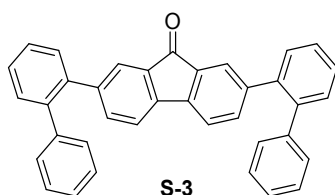

To a solution of 2,7-dibromo-9H-fluoren-9-one (compound **S-2** in Scheme S1, 500.0 mg, 1.48 mmol) in toluene (40 mL), 2-biphenylboronic acid (322.2 mg, 1.63 mmol), Pd(PPh<sub>3</sub>)<sub>4</sub> (68.4 mg, 0.07 mmol), aqueous solution K<sub>2</sub>CO<sub>3</sub> (2.0 M, 10 mL) and ethanol (1~2 mL) were added under argon atmosphere. The reaction mixture was stirred at 80 °C, and monitored by TLC to confirm consumption of starting material. Upon completion, the solution was diluted with dichloromethane (50 mL) and water (15 mL), and washed with brine (20 mL). After removal of the solvent, the residue was purified by silica gel chromatography (petroleum ether/CH<sub>2</sub>Cl<sub>2</sub> = 1:1) to afford compound **S-3** (703 mg, 98% yield) as a yellow solid. <sup>1</sup>H NMR (400 MHz, CDCl<sub>3</sub>): δ 7.56 (s, 2H), 7.45 (s, 8H) 7.24 - 7.18 (m, 12H), 7.12 (d, *J* = 7.8 Hz, 2H). <sup>13</sup>C NMR (100 MHz, CDCl<sub>3</sub>): δ 193.51, 142.58, 142.35, 141.04, 140.49, 139.22, 136.36, 134.48, 130.71, 130.11, 129.81, 128.10, 127.98, 127.63, 126.72, 125.44, 119.67. MS (APCI, *m/z*) calcd for C<sub>37</sub>H<sub>24</sub>O [M+Na]<sup>+</sup>, 507.1227; found: 507.1229, (error = 0.4 ppm).

### Synthesis of 1b

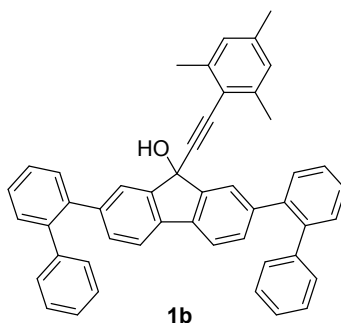

A solution of 2-ethynyl-1,3,5-trimethylbenzene (143 mg, 0.99 mmol) in THF (30 mL) was cooled to -78 °C, and *n*-BuLi (0.40 mL, 0.99 mmol, 2.5 M in hexane) was added dropwise under N<sub>2</sub> atmosphere. The freshly prepared lithium acetylide was kept stirring at -78 °C for 1 h, and was slowly added to a solution of compound **S-4** (400.0 mg, 0.83 mmol) in THF (20 mL) at -78 °C. The mixture was then warmed up to the room temperature and stirred for another 1 h. Upon completion of reaction, the solution was diluted with water (20 mL) and dichloromethane (50 mL). The organic layer was dried by anhydrous MgSO<sub>4</sub>. After filtration, the organic solvents were evaporated to dryness. The residue was purified by column chromatography on silica gel (petroleum ether/CH<sub>2</sub>Cl<sub>2</sub> = 1:1) to afford compound **1b** (488 mg, 94% yield) as a white solid. <sup>1</sup>H NMR (400 MHz, CDCl<sub>3</sub>): δ 7.61 (s, 2H), 7.51 - 7.49 (m, 10H), 7.40 - 7.38 (m, 2H), 7.20 - 7.18 (m, 8H), 7.10 (d, *J* = 8.2 Hz, 2H), 6.85 (s, 2H), 2.42 (s, 1H), 2.31 - 2.29 (m, 9H). <sup>13</sup>C NMR (100 MHz, CDCl<sub>3</sub>): δ 147.61, 141.82, 141.34, 140.59, 140.46, 140.18, 137.92, 137.02, 131.47, 130.61, 130.40, 129.85, 127.92, 127.63, 127.55, 127.50, 127.42, 126.49, 125.56, 119.56, 119.18, 96.32, 81.04, 75.07, 21.33, 20.94. HRMS (MALDI-TOF, *m/z*) calcd for C<sub>48</sub>H<sub>36</sub>O [M]<sup>+</sup>, 628.2766; found: 628.2749 (error = -2.7 ppm).

## General procedure for synthesis of 1c-1e

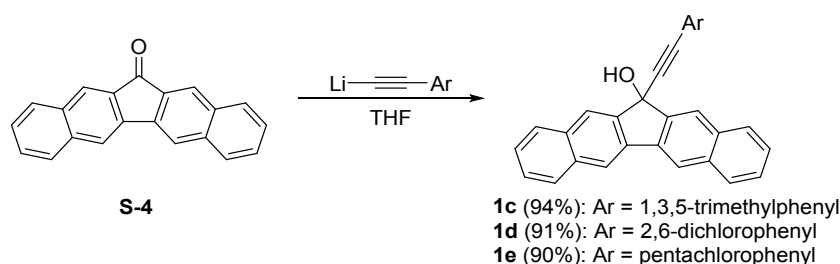

A solution of corresponding 1,3,5-trimethylphenyl/2,6-dichlorophenyl/pentachlorophenyl alkyne (1.71 mmol) in THF (20 mL) was cooled to  $-78\text{ }^{\circ}\text{C}$ , and *n*-BuLi (0.68 mL, 1.71 mmol, 2.5 M in hexane) was added dropwise under  $\text{N}_2$  atmosphere. The freshly prepared lithium acetylide was kept stirring at  $-78\text{ }^{\circ}\text{C}$  for 1 h, and slowly added to a solution of dibenzo[b,h]fluoren-12-one<sup>3</sup> (compound **S-4**, 400 mg, 1.43 mmol) in THF (80 mL) at  $-78\text{ }^{\circ}\text{C}$ . The mixture was then warmed up to the room temperature and stirred for another 1 h. Upon completion of reaction, the solution was diluted with water (20 mL) and dichloromethane (50 mL). The organic layer was dried by anhydrous  $\text{MgSO}_4$ . After filtration, the organic solvents were evaporated to dryness. The residue was purified by column chromatography on silica gel.

Compound **1c** (94 % yield) was obtained as a white solid.  $^1\text{H}$  NMR (400 MHz,  $\text{CDCl}_3$ ):  $\delta$  8.28 (s, 2H), 8.24 (s, 2H), 7.95 - 7.92 (m, 4H), 7.54 - 7.48 (m, 4H), 6.82 (s, 2H), 2.94 (s, 1H), 2.37 (s, 6H), 2.25 (s, 3H).  $^{13}\text{C}$  NMR (100 MHz,  $\text{CDCl}_3$ ):  $\delta$  147.24, 146.09, 140.58, 137.43, 134.59, 134.33, 134.23, 133.99, 128.72, 128.51, 128.30, 127.51, 126.70, 126.31, 126.17, 126.00, 123.87, 122.69, 119.32, 118.90, 81.84, 22.86, 21.29, 20.94. HRMS (MALDI-TOF,  $m/z$ ) calcd for  $\text{C}_{32}\text{H}_{24}\text{O}$   $[\text{M}]^+$ , 424.1827; found: 424.1830 (error = 0.7 ppm).

Compound **1d** (91 % yield) was obtained as a white solid.  $^1\text{H}$  NMR (400 MHz,  $\text{CDCl}_3$ ):  $\delta$  8.31 (s, 2H), 8.19 (s, 2H), 7.92 (d,  $J = 7.8$  Hz, 4H), 7.54 - 7.47 (m, 4H), 7.28 (d,  $J = 8.1$  Hz, 2H), 7.13 (t,  $J = 8.1$  Hz, 1H), 3.09 (s, 1H).  $^{13}\text{C}$  NMR (100 MHz,  $\text{CDCl}_3$ ):  $\delta$  145.06, 137.70, 136.57, 137.69, 134.18, 129.36, 128.81, 128.36, 127.43, 126.83, 126.21, 124.36, 119.39, 100.12, 78.51, 74.63. HRMS (MALDI-TOF,  $m/z$ ) calcd for  $\text{C}_{29}\text{H}_{16}\text{Cl}_2\text{O}$   $[\text{M}]^+$ , 450.0578; found: 450.0589 (error = 2.4 ppm).

Compound **1e** (90 % yield) was obtained as a white solid compound.  $^1\text{H}$  NMR (400 MHz,  $\text{CDCl}_3$ ):  $\delta$  8.30 (d,  $J = 7.5$  Hz, 2H), 8.26 (s, 2H), 7.96 - 7.93 (m, 4H), 7.55 - 7.51 (m, 4H), 2.98 (s, 1H).  $^{13}\text{C}$  NMR (100 MHz,  $\text{CDCl}_3$ ):  $\delta$  144.67, 136.53, 135.01, 134.76, 134.16, 131.77, 131.70, 130.45, 128.81, 128.41, 127.05, 126.41, 124.41, 119.56, 119.53, 102.18, 78.10, 74.65. HRMS (MALDI-TOF,  $m/z$ ) calcd for  $\text{C}_{29}\text{H}_{13}\text{Cl}_5\text{O}$   $[\text{M}]^+$ , 553.9380; found: 553.9377 (error = -0.5 ppm).

## Synthesis of compound 2b

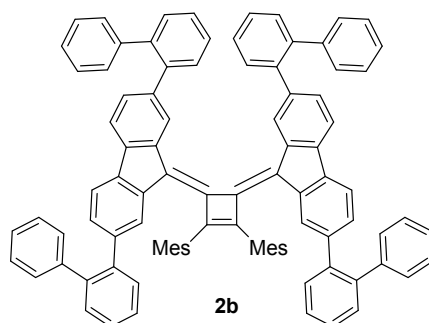

To a solution of compound **1b** (400.0 mg, 0.64 mmol) in dry DCM (100 mL), anhydrous SnCl<sub>2</sub> (603 mg, 3.18 mmol) was added at room temperature. The resulting mixture was kept stirring for 6 h, and monitored by TLC to confirm consumption of starting material. Upon completion, the mixture was evaporated to dryness. The residue was purified by column chromatography on silica gel (petroleum ether/CH<sub>2</sub>Cl<sub>2</sub> = 4:1) to afford compound **2b** (249 mg, 64% yield) as a yellow solid. <sup>1</sup>H NMR (400 MHz, CDCl<sub>3</sub>): δ 7.89 (s, 2H), 7.32 - 7.30 (m, 6H), 7.25 - 7.24 (m, 6H), 7.18 - 7.12 (m, 14H), 7.07 - 7.02 (m, 8H), 6.85 (d, *J* = 7.6 Hz, 2H), 6.81 - 6.79 (m, 4H), 6.72 - 6.66 (m, 6H), 6.58 - 6.56 (m, 2H), 5.91 (d, *J* = 7.7 Hz, 2H), 2.41 (s, 6H), 2.08 (s, 6H), 1.94 (s, 6H). <sup>13</sup>C NMR (100 MHz, CDCl<sub>3</sub>): δ 160.39, 146.22, 141.81, 141.77, 140.49, 140.18, 140.07, 139.84, 139.68, 139.17, 138.93, 138.79, 138.43, 138.24, 137.70, 135.93, 135.85, 131.31, 130.72, 130.43, 130.30, 130.16, 130.11, 129.84, 129.81, 129.76, 129.61, 128.82, 128.79, 127.89, 127.80, 127.23, 126.95, 126.87, 126.76, 126.25, 126.07, 124.90, 118.08, 117.70, 21.14, 20.92, 20.46. HRMS (MALDI-TOF, *m/z*) calcd for C<sub>96</sub>H<sub>70</sub> [M]<sup>+</sup>, 1222.5478; found: 1222.5474 (error = -0.3 ppm).

### Synthesis of target PBF-Mes and compound 3a

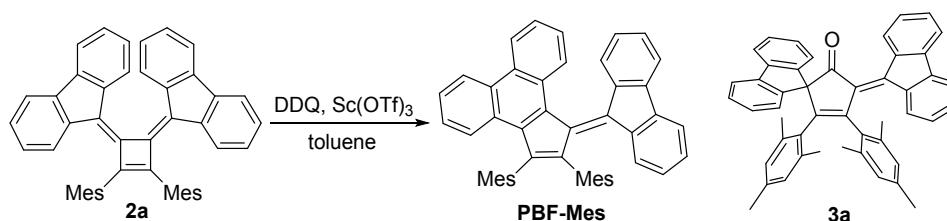

To a solution of compound **2a**<sup>1</sup> (150 mg, 0.24 mmol) in toluene (40 mL), DDQ (277 mg, 1.22 mmol) and Sc(OTf)<sub>3</sub> (600 mg, 1.22 mmol) were added under argon atmosphere. The reaction mixture was stirred at 120 °C, and monitored by TLC to confirm consumption of starting material. Upon completion and filtration, the organic solvents were evaporated to dryness. The residue was purified by column chromatography on silica gel (petroleum ether/CH<sub>2</sub>Cl<sub>2</sub> = 4:1) to afford compound **PBF-Mes** (129 mg, 86% yield) as a red solid. The same reaction could produce a yellowish **3a** (14 mg, 9% yield) when exposure to the air, while the major part is the ring-expansion compound **PBF-Mes**.

Compound **PBF-Mes**: <sup>1</sup>H NMR (400 MHz, CDCl<sub>3</sub>): δ 8.66 (d, *J* = 8.3 Hz, 1H), 8.61 (d, *J* = 8.3 Hz, 1H), 8.13 (d, *J* = 8.2 Hz, 1H), 7.54 - 7.48 (m, 3H), 7.39 - 7.36 (m, 2H), 7.28 (s, 1H), 7.23 - 7.19 (m, 2H), 7.15 - 7.07 (m, 2H), 6.87 - 6.83 (m, 2H), 6.80 - 6.75 (m, 2H), 6.65 - 6.59 (m, 2H), 6.34 (s, 1H), 2.30 (s, 3H), 2.26 (s, 3H), 2.09 (s, 3H), 2.03 (s, 3H), 1.97 (s, 3H), 1.63 (s, 3H). <sup>13</sup>C NMR (100 MHz, CDCl<sub>3</sub>): δ 147.04, 145.46, 145.16, 141.44, 141.24, 140.77, 139.57, 139.20, 137.79, 137.08, 136.93, 136.71, 136.59, 136.38, 135.76, 133.82, 133.59, 131.89, 130.53, 130.31, 130.24, 129.32, 129.17, 129.12, 128.78, 128.68, 128.44, 128.28, 128.18, 127.80, 127.70, 126.81, 126.75, 126.60, 126.36, 125.66, 124.08, 123.61, 123.56, 123.12, 119.23, 119.05, 21.90, 21.37, 21.29, 21.14, 20.98, 20.81. HRMS (MALDI-TOF, *m/z*) calcd for C<sub>48</sub>H<sub>38</sub> [M]<sup>+</sup>, 614.2974; found 614.2969 (error = -0.8 ppm).

Compound **3a**: <sup>1</sup>H NMR (400 MHz, CDCl<sub>3</sub>): δ 8.71 (d, *J* = 8.0 Hz, 1H), 7.72 (d, *J* = 7.5 Hz, 2H), 7.54 (d, *J* = 11.9 Hz, 1H), 7.52 (d, *J* = 7.5 Hz, 1H), 7.33 - 7.28 (m, 4H), 7.24 - 7.22 (m, 1H), 7.17 - 7.09 (m, 4H), 7.02 (d, *J* = 7.9 Hz, 1H), 6.79 (t, *J* = 7.6 Hz, 1H), 6.66 (s, 2H), 6.48 (s, 2H), 2.14 (s, 3H), 2.09 (s, 6H), 2.04 (s, 3H), 1.69 (s, 6H). <sup>13</sup>C NMR (100 MHz, CDCl<sub>3</sub>): δ 199.48, 152.14, 147.96, 143.88, 141.63, 141.15, 141.06, 138.65, 137.69, 137.34, 137.23, 136.96, 136.92, 136.74, 136.61,

132.84, 132.72, 129.57, 129.46, 129.28, 128.91, 128.85, 128.22, 127.55, 127.53, 126.57, 125.90, 124.20, 120.41, 119.19, 118.98, 22.86, 22.08, 20.88, 20.74. HRMS (MALDI-TOF,  $m/z$ ) calcd for  $C_{48}H_{38}O$   $[M]^+$ , 630.2923; found: 630.2906 (error = -2.7 ppm).

### Synthesis of compound **PBF-2b** and **3b**

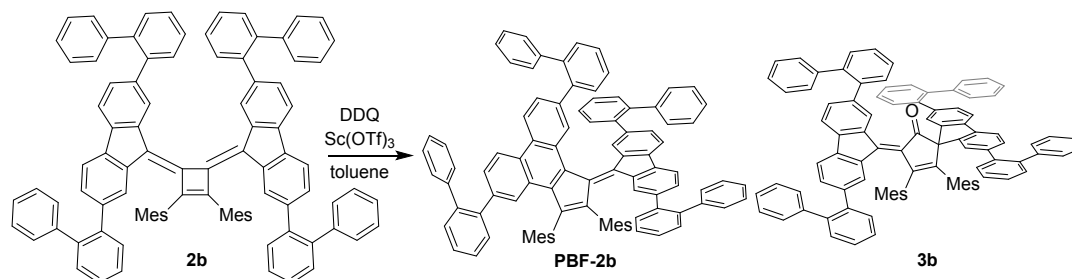

To a solution of compound **2b** (200 mg, 0.16 mmol) in toluene (40 mL), DDQ (185 mg, 0.82 mmol) and  $Sc(OTf)_3$  (402 mg, 0.82 mmol) were added under argon atmosphere. The reaction mixture was stirred at 120 °C. The reaction was monitored by TLC to confirm consumption of starting material. Upon completion and filtration, the red solvent was evaporated to dryness. The residue was purified by column chromatography on silica gel (petroleum ether/ $CH_2Cl_2$  = 3:1) to afford compound **PBF-2b** (172 mg, 86% yield) as a red solid. The same reaction could produce a yellowish **3b** (8 mg, 4% yield) when exposure to the air, while the major part is the ring-expansion compound **PBF-2b**.

Compound **PBF-2b**:  $^1H$  NMR (400 MHz,  $CDCl_3$ ):  $\delta$  8.25 (s, 1H), 8.16 (d,  $J$  = 8.1 Hz, 1H), 8.10 (d,  $J$  = 8.7 Hz, 1H), 7.48 (s, 1H), 7.36 - 7.29 (m, 9H), 7.21 - 7.06 (m, 21H), 7.00 - 6.89 (m, 9H), 6.86 - 6.84 (m, 2H), 6.75 (d,  $J$  = 8.7 Hz, 1H), 6.71 (s, 1H), 6.58 (d,  $J$  = 7.6 Hz, 1H), 6.54 - 6.52 (m, 2H), 6.34 (d,  $J$  = 7.7 Hz, 1H), 6.24 (s, 1H), 2.29 (s, 3H), 2.22 (s, 3H), 2.19 (s, 3H), 1.99 (s, 3H), 1.89 (s, 3H), 1.80 (s, 3H).  $^{13}C$  NMR (100 MHz,  $CDCl_3$ ):  $\delta$  146.68, 145.91, 145.50, 141.66, 141.52, 141.51, 141.43, 140.18, 140.14, 140.03, 139.85, 139.76, 139.71, 139.64, 139.58, 139.54, 139.36, 139.25, 137.15, 136.88, 136.80, 136.51, 135.85, 133.72, 132.63, 131.94, 131.18, 131.15, 130.90, 130.84, 130.53, 130.38, 130.35, 130.33, 130.26, 129.90, 129.86, 129.39, 128.79, 128.74, 128.33, 128.30, 128.25, 128.07, 127.94, 127.86, 127.79, 127.55, 127.52, 127.40, 127.28, 127.18, 127.07, 127.04, 126.49, 126.34, 126.31, 126.28, 124.20, 122.30, 122.00, 118.86, 118.45, 22.37, 21.59, 21.42, 21.03. HRMS (APCI,  $m/z$ ) calcd for  $C_{96}H_{70}$   $[M]^+$ , 1222.5478; found: 1222.5471 (error = -0.6 ppm).

Compound **3b**:  $^1H$  NMR (400 MHz,  $CDCl_3$ ):  $\delta$  8.76 (s, 1H), 7.54 (s, 1H), 7.52 (s, 1H), 7.41 - 7.38 (m, 5H), 7.35 - 7.34 (m, 3H), 7.32 - 7.28 (m, 7H), 7.24 - 7.18 (m, 6H), 7.16 - 7.12 (m, 6H), 7.10 - 7.05 (m, 4H), 7.02 - 6.96 (m, 7H), 6.90 - 6.85 (m, 6H), 6.75 - 6.73 (m, 1H), 6.52 (s, 2H), 6.48 (s, 2H), 1.88 (s, 9H), 1.67 (s, 9H).  $^{13}C$  NMR (100 MHz,  $CDCl_3$ ):  $\delta$  198.28, 152.34, 148.46, 141.91, 141.18, 141.14, 140.91, 140.78, 140.56, 140.53, 140.47, 139.97, 129.94, 139.72, 139.46, 139.40, 139.36, 138.37, 137.91, 137.14, 137.10, 137.08, 136.99, 136.88, 132.75, 132.56, 131.72, 131.36, 131.06, 130.59, 130.54, 130.46, 130.43, 130.35, 130.15, 130.00, 129.76, 129.62, 129.38, 128.72, 128.07, 127.81, 127.77, 127.74, 127.51, 127.47, 127.32, 127.13, 127.01, 126.31, 126.23, 125.57, 119.76, 118.57, 118.32, 78.48, 23.09, 22.69, 21.98, 20.98, 20.76. HRMS (MALDI-TOF,  $m/z$ ) calcd for  $C_{96}H_{70}O$   $[M]^+$ , 1238.5427; found: 1238.5430 (error = 0.2 ppm).

## Synthesis of target SBF-Mes

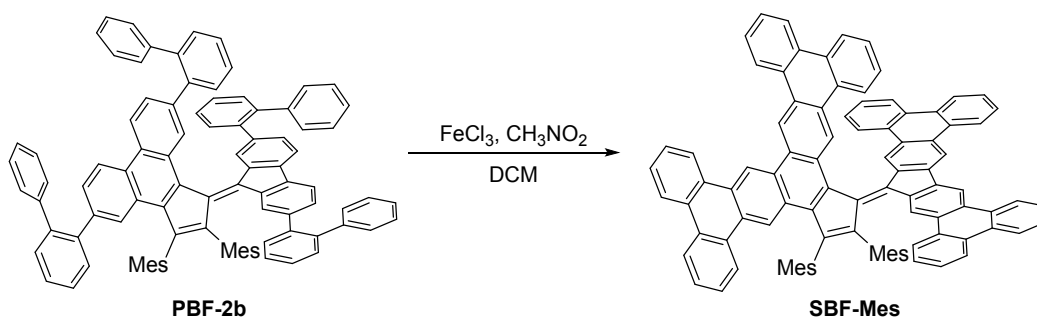

Ferric chloride (311 mg, 1.92 mmol) was dissolved in anhydrous nitromethane (3 mL), and was then slowly added to the solution **PBF-2b** (150 mg, 0.12 mmol) in anhydrous DCM (50 mL) under an argon atmosphere at 0 °C. The reaction mixture was stirred at room temperature, and monitored by TLC to confirm consumption of starting material. The reaction was quenched by water (5 mL). The organic layer was separated and evaporated to dryness. The residue was purified by column chromatography on silica gel (petroleum ether/CH<sub>2</sub>Cl<sub>2</sub> = 3:1) to afford **SBF-Mes** (130 mg, 86% yield) as a purple solid. <sup>1</sup>H NMR (400 MHz, CDCl<sub>3</sub>): δ 10.50 (s, 1H), 10.26 (s, 1H), 9.07 (d, *J* = 8.2 Hz, 1H), 9.04 (d, *J* = 8.0 Hz, 1H), 8.99 (s, 1H), 8.69 (d, *J* = 8.0 Hz, 1H), 8.64 (d, *J* = 8.1 Hz, 1H), 8.58 (d, *J* = 8.1 Hz, 1H), 8.52 (d, *J* = 7.7 Hz, 1H), 8.14 (s, 1H), 8.01 - 7.99 (m, 1H), 7.94 - 7.92 (m, 1H), 7.86 - 7.82 (m, 1H), 7.80 - 7.78 (m, 2H), 7.72 - 7.66 (m, 2H), 7.61 - 7.59 (m, 2H), 7.57 - 7.48 (m, 4H), 7.45 - 7.41 (m, 4H), 7.37 - 7.33 (m, 2H), 7.21 - 7.15 (m, 7H), 6.99 - 6.97 (m, 4H), 6.82 - 6.80 (m, 1H), 6.60 (s, 1H), 6.27 (s, 1H), 6.18 (s, 1H), 2.55 (s, 3H), 2.26 (s, 3H), 2.08 (s, 3H), 2.01 (s, 3H), 1.73 (s, 3H), 1.69 (s, 3H). <sup>13</sup>C NMR (100 MHz, CDCl<sub>3</sub>): δ 163.29, 161.59, 161.04, 150.49, 149.84, 148.27, 140.17, 139.58, 139.55, 139.34, 138.73, 138.65, 138.52, 138.24, 138.17, 137.83, 137.54, 136.20, 136.06, 135.93, 135.79, 135.52, 134.16, 134.11, 133.59, 132.89, 132.63, 132.49, 132.04, 131.79, 130.92, 130.34, 130.23, 129.67, 129.34, 129.23, 128.82, 128.76, 128.54, 128.27, 128.24, 128.19, 127.85, 127.72, 127.23, 126.53, 126.50, 126.33, 126.06, 125.54, 124.87, 124.52, 124.47, 124.18, 124.15, 123.71, 123.39, 122.60, 119.17, 118.80, 117.87, 21.24, 21.09, 20.95, 20.73, 20.60, 20.17. HRMS (APCI, *m/z*) calcd for C<sub>96</sub>H<sub>62</sub> [M]<sup>+</sup>, 1214.4852; found: 1214.4832 (error = -1.6 ppm).

## General procedure for synthesis of target NBF-Mes/ DCP/PCP

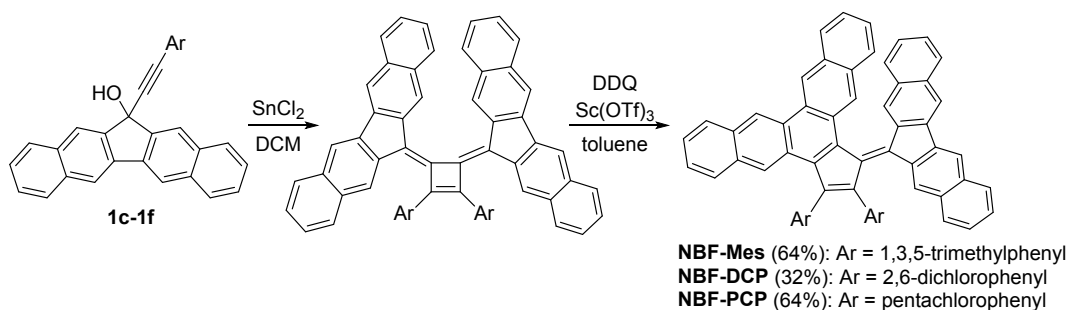

To a solution of compound **1c-1f** (0.47 mmol) in dry DCM (50 mL), anhydrous SnCl<sub>2</sub> (447 mg, 2.36 mmol) was added at room temperature. The resulting mixture was kept stirring for 6 h. The



---

reaction was monitored by TLC to confirm consumption of starting material. Upon completion, the mixture was filtered and evaporated to dryness. The resulting cyclobutene derivative was used in next step without further purification. To a solution of crude cyclobutene derivative in toluene (40 mL), DDQ (267 mg, 1.18 mmol) and Sc(OTf)<sub>3</sub> (580 mg, 1.18 mmol) were added under argon atmosphere. The reaction mixture was stirred at 120 °C, and monitored by TLC to confirm consumption of starting material. Upon completion, the mixture was evaporated to dryness. The residue was purified by column chromatography on silica gel (petroleum ether/CH<sub>2</sub>Cl<sub>2</sub>= 4:1) to afford the desired compounds.

Compound **NBF-Mes** (64% yield for two steps) was obtained as a purplish red solid. <sup>1</sup>H NMR (400 MHz, CDCl<sub>3</sub>): δ 9.27 (s, 1H), 9.19 (s, 1H), 8.64 (s, 1H), 8.16 (s, 1H), 8.12 - 8.09 (m, 3H), 8.01 (d, *J* = 8.3 Hz, 1H), 7.77 (t, *J* = 8.9 Hz, 2H), 7.62 (s, 1H), 7.57 (s, 1H), 7.54 - 7.50 (m, 1H), 7.40 - 7.29 (m, 8H), 7.17 (t, *J* = 7.7 Hz, 1H), 7.07 - 7.06 (m, 2H), 6.90 (s, 1H), 6.86 (s, 1H), 6.73 (s, 1H), 6.20 (s, 1H), 2.51 (s, 3H), 2.38 (s, 3H), 2.17 (s, 3H), 2.06 (s, 3H), 1.85 (s, 3H), 1.68 (s, 3H). <sup>13</sup>C NMR (100 MHz, CDCl<sub>3</sub>): δ 147.82, 142.01, 139.32, 139.25, 138.27, 137.39, 137.28, 137.11, 136.84, 136.52, 136.34, 135.73, 134.19, 134.06, 133.82, 133.41, 133.01, 132.38, 132.06, 131.73, 130.79, 130.16, 129.80, 129.74, 129.60, 128.85, 128.66, 128.49, 128.32, 128.27, 127.98, 127.84, 127.68, 127.40, 127.33, 127.21, 126.08, 125.71, 125.63, 125.55, 125.06, 123.16, 122.93, 122.33, 118.25, 118.00, 22.34, 21.85, 21.42, 21.25, 21.19, 20.51. HRMS (APCI, *m/z*) calcd for C<sub>64</sub>H<sub>47</sub><sup>+</sup> [M+H]<sup>+</sup>, 815.3672; found: 815.3677 (error = 0.6 ppm).

Compound **NBF-DCP** (32% yield for two steps) was obtained as a violet solid. <sup>1</sup>H NMR (400 MHz, CDCl<sub>3</sub>): δ 9.30 (s, 1H), 9.23 (s, 1H), 8.80 (s, 1H), 8.31 (s, 1H), 8.14 - 8.12 (m, 2H), 8.09 (s, 1H), 8.06 - 8.02 (m, 2H), 7.80 - 7.76 (m, 2H), 7.64 (s, 1H), 7.57 - 7.51 (m, 2H), 7.45 - 7.41 (m, 5H), 7.38 - 7.30 (m, 5H), 7.21 - 7.18 (m, 1H), 7.15 - 7.09 (m, 3H), 6.73 - 6.65 (m, 2H). <sup>13</sup>C NMR (100 MHz, THF-*d*<sub>8</sub>): δ 151.60, 139.55, 139.16, 139.01, 138.75, 138.22, 138.03, 137.41, 136.96, 136.58, 135.88, 135.30, 135.17, 133.49, 132.84, 132.74, 132.45, 132.30, 131.99, 131.16, 131.06, 130.53, 130.15, 129.82, 129.38, 128.92, 128.84, 128.69, 128.65, 128.56, 128.54, 128.50, 128.43, 128.35, 128.29, 128.24, 127.91, 127.40, 127.04, 126.67, 126.58, 126.34, 126.23, 125.97, 125.31, 124.58, 124.33, 123.89, 123.24, 122.78, 122.69, 122.29, 119.67, 119.37, 119.33. MS (MALDI-TOF, *m/z*) calcd for C<sub>54</sub>H<sub>30</sub>Cl<sub>4</sub> [M]<sup>+</sup>, 866.1102; found: 866.1085 (error = -2.0 ppm).

Compound **NBF-PCP** (64% yield for two steps) was obtained as a bluish violet solid. <sup>1</sup>H NMR (400 MHz, CDCl<sub>3</sub>): δ 9.32 (s, 1H), 9.25 (s, 1H), 8.84 (s, 1H), 8.28 (s, 1H), 8.15 (d, *J* = 8.2 Hz, 1H), 8.10 - 8.06 (m, 3H), 7.81 - 7.80 (m, 2H), 7.77 (d, *J* = 8.2 Hz, 1H), 7.58 - 7.48 (m, 6H), 7.46 - 7.45 (m, 1H), 7.43 - 7.34 (m, 4H), 7.10 (d, *J* = 6.2 Hz, 2H). <sup>13</sup>C NMR (100 MHz, THF-*d*<sub>8</sub>): δ 154.12, 153.77, 139.95, 139.57, 139.33, 139.26, 139.20, 138.19, 138.03, 137.92, 136.97, 136.87, 136.13, 136.01, 135.74, 135.40, 134.95, 134.70, 134.62, 134.38, 133.58, 133.44, 133.30, 133.25, 133.17, 133.04, 132.36, 132.20, 132.07, 131.90, 131.74, 131.24, 130.88, 130.60, 129.97, 129.68, 129.53, 129.44, 129.37, 129.12, 128.98, 128.85, 128.46, 128.19, 127.83, 127.46, 127.37, 127.09, 127.04, 126.88, 126.57, 126.53, 124.45, 124.07, 123.98, 122.37, 122.20, 120.20, 120.16. HRMS (MALDI-TOF, *m/z*) calcd for C<sub>58</sub>H<sub>24</sub>Cl<sub>10</sub> [M]<sup>+</sup>, 1073.8704; found: 1073.8743 (error = 3.6 ppm).

## Results and Discussion

## X-ray crystallography of compound 3a

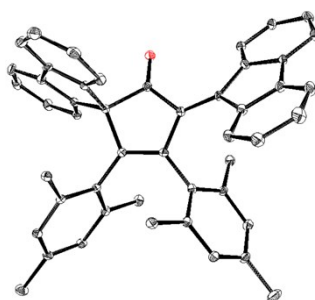

**Figure S1.** ORTEP plots of crystal structure **3a** (atoms: C, black; O, red). Thermal ellipsoids are shown at 30%, hydrogen atoms are omitted for clarity.

## Theoretical calculations of reaction pathways

Density functional theory (DFT) calculations were performed with the Gaussian 09 program.<sup>4</sup> All geometry optimizations were carried out at the B3LYP level of density functional theory with the 6-31G(d,p) basis set (*vide infra*). The nature of the stationary points was assessed by means of vibrational frequency analysis. The transition states of the reaction paths were confirmed by intrinsic reaction coordinate (IRC) calculations. In the implicit solvent model by using B3LYP/6-31G(d,p) method, the CPCM polarizable conductor calculation model was used to the polarizable continuum model (PCM) in the self-consistent reaction field (SCRF) procedure.

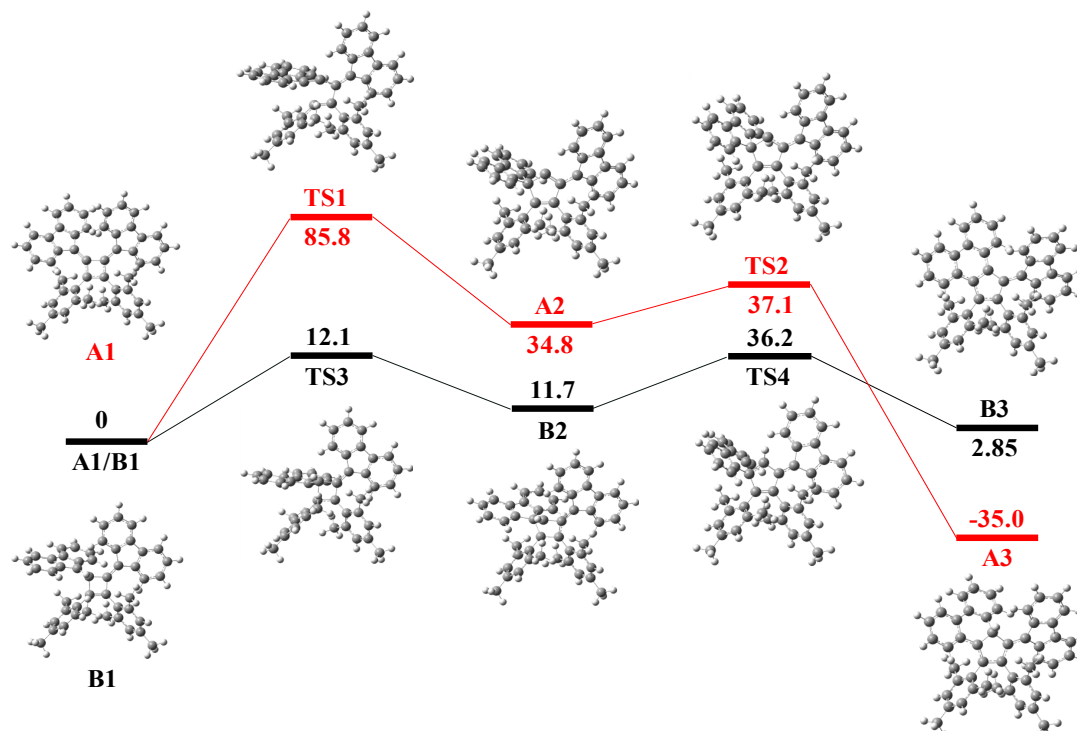

**Figure S2.** Optimized structures and relative energy (kcal/mol) associated with each transition state in the two possible reaction pathways (Path A: red; Path B: black).

**Table S1.** Summary of the control experiments.

| Entry | Condition                                | Temperature | Reaction time | Yield by HPLC |
|-------|------------------------------------------|-------------|---------------|---------------|
| 1     | DDQ (5 eq.)                              | 120 °C      | 3 days        | 1%            |
| 2     | Sc(OTf) <sub>3</sub> (5 eq.)             | 20 °C       | 3 days        | -             |
| 3     | Sc(OTf) <sub>3</sub> (5 eq.)             | 100 °C      | 3 days        | 23%           |
| 4     | Sc(OTf) <sub>3</sub> (5 eq.)             | 120 °C      | 2 days        | 23%           |
| 5     | Sc(OTf) <sub>3</sub> (5 eq.)/DDQ (1 eq.) | 120 °C      | 31 h          | 34%           |

### The aromatic proton resonances of NBF-Mes/DCP/PCP

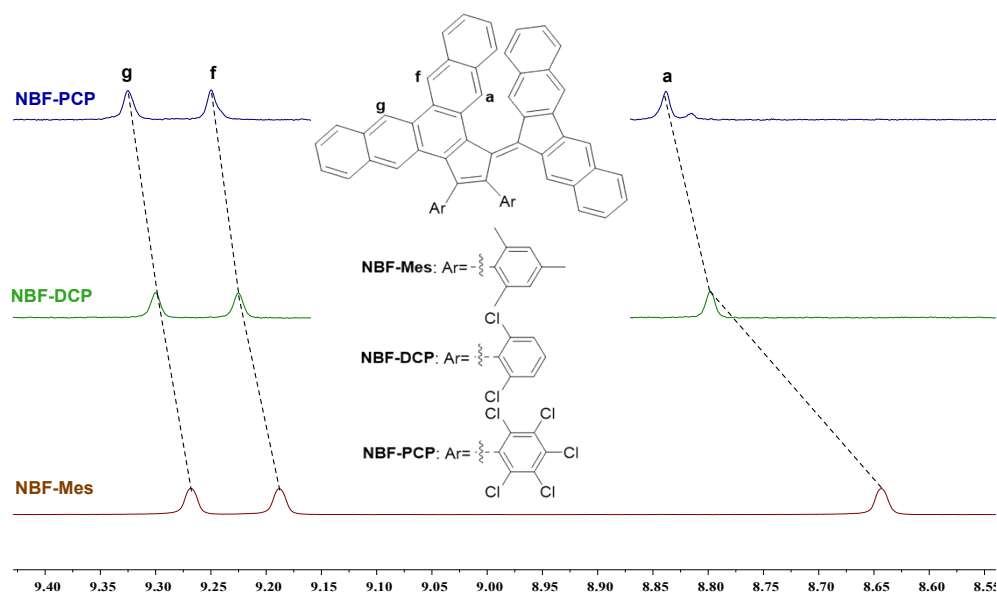

**Figure S3.** The downfield shifts for aromatic proton resonances from NBF-Mes to NBF-DCP, and to NBF-PCP.

### The photophysical and electrochemical properties of new compounds.

**Table S2.** Summary of the photophysical and electrochemical properties of new compounds.

| Cmpds                                           | PBF-Mes | NBF-Mes | SBF-Mes | NBF-DCP | NBF-PCP |
|-------------------------------------------------|---------|---------|---------|---------|---------|
| $\lambda_{\text{abs}}^{\text{max}}$ (nm)        | 488     | 545     | 555     | 560     | 570     |
| $\lambda_{\text{onset}}^{\text{max}}$ (nm)      | 586     | 667     | 755     | 747     | 789     |
| $E_{\text{g}}^{\text{opt}}$ (eV) <sup>[a]</sup> | 1.75    | 1.54    | 1.36    | 1.37    | 1.30    |
| $E_{\text{red}}^1$ (V) <sup>[b]</sup>           | -1.37   | -1.15   | -1.09   | -1.00   | -0.89   |
| $E_{\text{red}}^2$ (V) <sup>[b]</sup>           | -1.76   | -1.59   | -1.37   | -1.57   | -1.50   |
| $E_{\text{ox}}$ (V) <sup>[b]</sup>              | 0.49    | 0.47    | 0.51    | 0.57    | 0.65    |
| $E_{\text{g}}^{\text{cv}}$ (eV) <sup>[b]</sup>  | 1.86    | 1.62    | 1.60    | 1.57    | 1.54    |
| LUMO (eV) <sup>[c]</sup>                        | -3.43   | -3.65   | -3.71   | -3.80   | -3.91   |
| HOMO (eV) <sup>[c]</sup>                        | -5.29   | -5.27   | -5.31   | -5.37   | -5.45   |
| Dipole Moment (D) <sup>[d]</sup>                | 1.09    | 2.10    | 2.22    | 3.08    | 5.19    |

<sup>[a]</sup>Calculated from the onset of UV absorption. <sup>[b]</sup>Onset potentials vs Fc/Fc<sup>+</sup>, determined by cyclic voltammetric measurements in 0.10 M solution of *n*-Bu<sub>4</sub>N<sup>+</sup>PF<sub>6</sub><sup>-</sup> in CH<sub>2</sub>Cl<sub>2</sub>. <sup>[c]</sup>Estimated from onsets

of oxidative waves and reduction waves in CV measurements. <sup>[d]</sup>Obtained from DFT calculations at the B3LYP/6-31G(d,p) level on Gaussian 09 program.

### Crystal packing of compound PBF-Mes and NBF-Mes

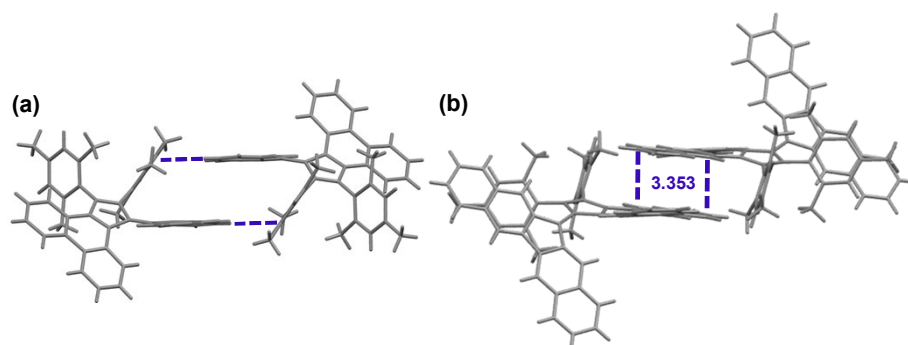

**Figure S4.** Crystal packing of small-sized **PBF-Mes** and larger-sized **NBF-Mes**.

### DFT and TD-DFT calculations

DFT and time-dependent DFT (TD-DFT) were performed using the Gaussian 09 software package. All calculations were carried out using the DFT method with Becke's three-parameter hybrid exchange functionals and the Lee-Yang-Parr correlation functional (B3LYP) employing the 6-31G(d,p) basis set for all atoms.

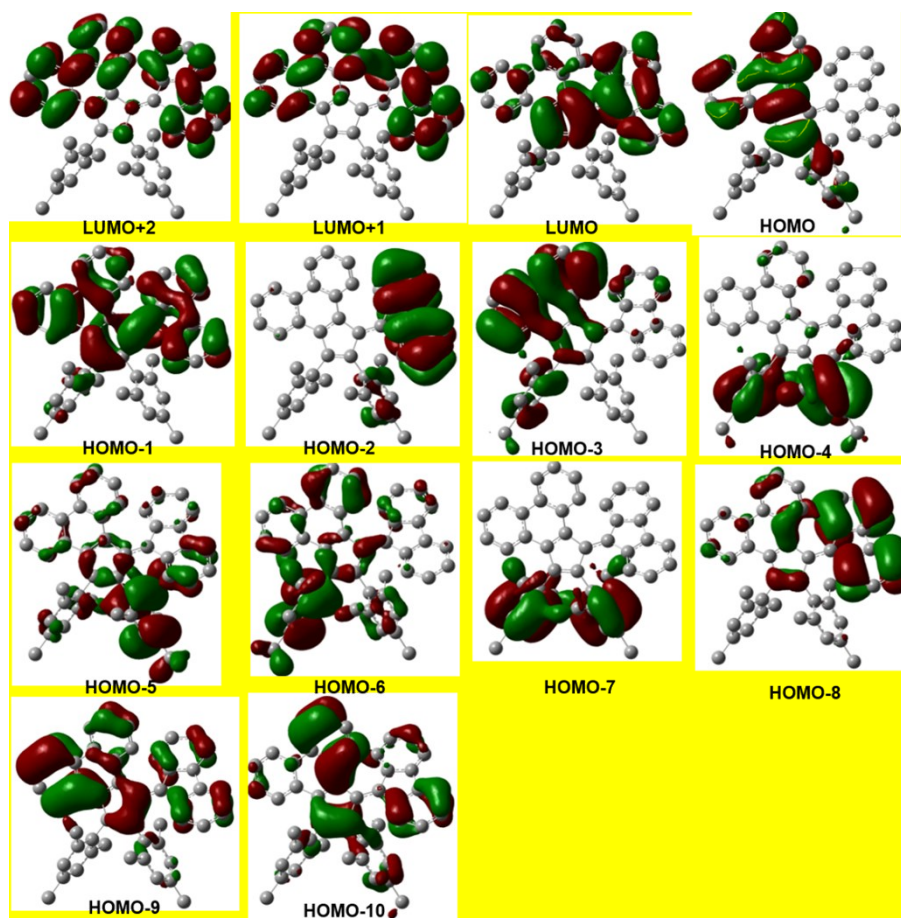

**Figure S5.** Calculated MOs profiles of **PBF-Mes** at the B3LYP/6-31G(d,p) level.

**Table S3.** Major electronic transitions of **PBF-Mes** calculated by TD-DFT.

| excited state | Energy (cm <sup>-1</sup> ) | Wavelength (nm) | Osc. Strength | Major contribs                            |
|---------------|----------------------------|-----------------|---------------|-------------------------------------------|
| 1             | 14687.45760                | 680.85303       | 0.0044        | H>L (99%)                                 |
| 2             | 20524.53232                | 487.22182       | 0.0539        | H-2>L (79%)<br>H-1>L (18%)                |
| 3             | 20987.49776                | 476.47414       | 0.2598        | H-2>L (20%)<br>H-1>L (65%)                |
| 4             | 22581.26032                | 442.84508       | 0.0623        | H-4>L (53%)<br>H-3>L (31%)                |
| 5             | 22882.91376                | 437.00728       | 0.0190        | H-4>L (36%)<br>H-3>L (55%)                |
| 6             | 23653.17856                | 422.77616       | 0.0058        | H-6>L (46%)<br>H-5>L (44%)                |
| 7             | 24225.02960                | 412.79619       | 0.1066        | H-6>L (42%)<br>H-5>L (47%)                |
| 8             | 25025.13712                | 399.59821       | 0.0282        | H-7>L (95%)                               |
| 9             | 28886.13984                | 346.18679       | 0.0488        | H-8>L (92%)                               |
| 10            | 30170.98992                | 331.44421       | 0.0642        | H>L+1 (76%)<br>H>L+2 (13%)<br>H-9>L (14%) |
| 11            | 31096.92080                | 321.57525       | 0.0052        | H>L+1 (20%)<br>H>L+2 (54%)                |
| 12            | 31300.98048                | 319.47881       | 0.0033        | H-10>L (74%)<br>H-9>L (19%)               |

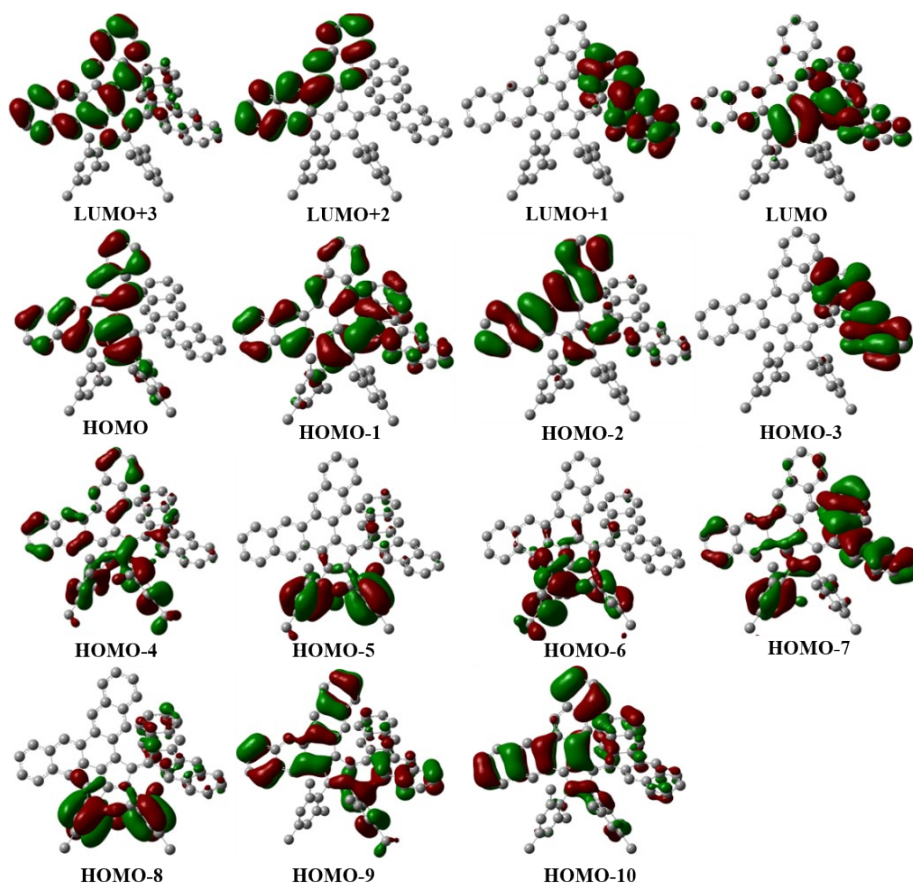

**Figure S6.** Calculated MOs profiles of **NBF-Mes** at the B3LYP/6-31G(d,p) level.



**Table S4.** Major electronic transitions of NBF-Mes calculated by TD-DFT method.

| excited state | Energy (cm <sup>-1</sup> ) | Wavelength (nm) | Osc. Strength | Major contribs                                 |
|---------------|----------------------------|-----------------|---------------|------------------------------------------------|
| 1             | 12429.89616                | 804.51195       | 0.0201        | H>L (96%)                                      |
| 2             | 17428.95504                | 573.75786       | 0.0242        | H-2>L (46%)<br>H-1>L (52%)                     |
| 3             | 18565.39808                | 538.63644       | 0.3641        | H-2>L (46%)<br>H-1>L (36%)                     |
| 4             | 18725.90352                | 534.01962       | 0.0390        | H-3>L (85%)                                    |
| 5             | 20620.51296                | 484.95398       | 0.1256        | H-4>L (86%)                                    |
| 6             | 22461.08288                | 445.21450       | 0.0064        | H-5>L (98%)                                    |
| 7             | 22874.0416                 | 437.17678       | 0.0299        | H-6>L (95%)                                    |
| 8             | 23057.13072                | 433.70530       | 0.0066        | H>L+1 (98%)                                    |
| 9             | 24279.06912                | 411.87740       | 0.0104        | H>L+2 (89%)                                    |
| 10            | 24498.45344                | 408.18903       | 0.0231        | H-8>L (10%)<br>H-7>L (80%)                     |
| 11            | 24788.00848                | 403.42087       | 0.0161        | H-8>L (76%)<br>H-7>L (14%)<br>H-9>L (31%)      |
| 12            | 25940.58272                | 385.49635       | 0.0211        | H-2>L+1 (10%)<br>H-1>L+1 (49%)<br>H-10>L (33%) |
| 13            | 26126.09152                | 382.75912       | 0.0072        | H-9>L (38%)<br>H-1>L+1 (18%)                   |

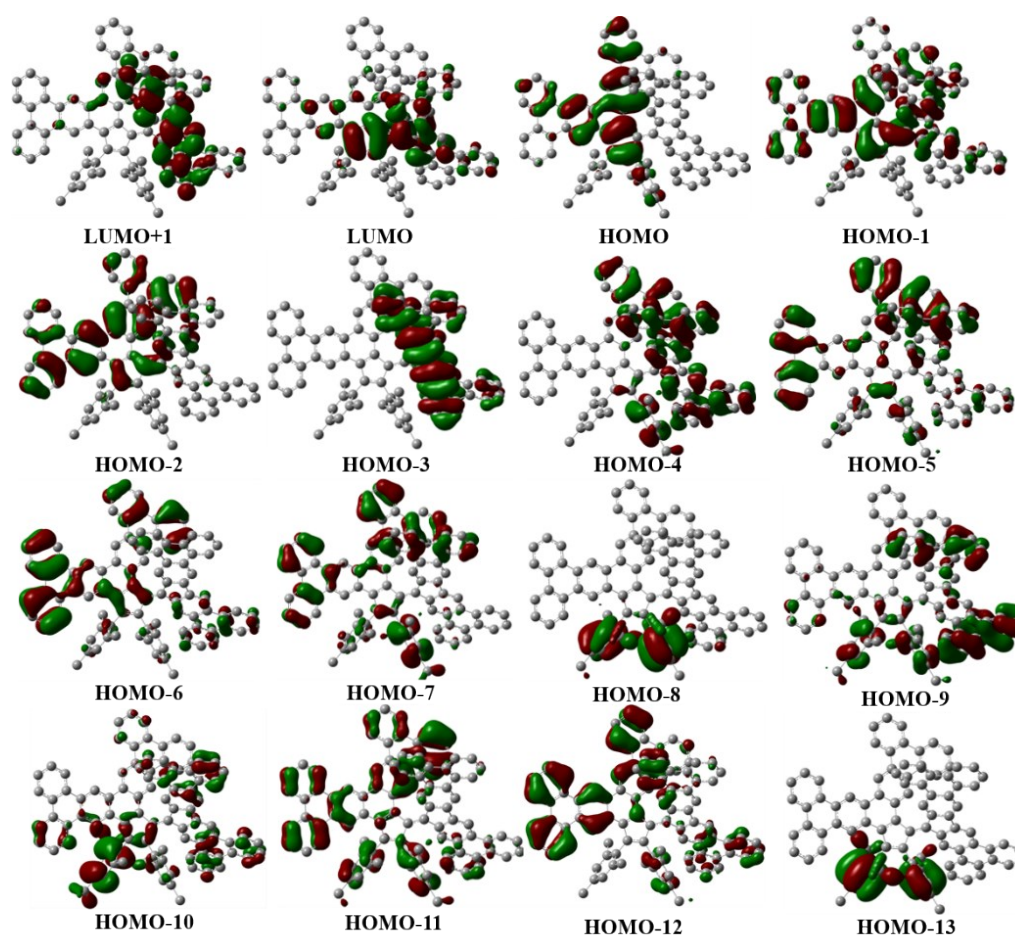**Figure S7.** Calculated MOs profiles of SBF-Mes at the B3LYP/6-31G(d,p) level.

**Table S5.** Major electronic transitions of **SBF-Mes** calculated by TD-DFT method.

| excited state | Energy (cm <sup>-1</sup> ) | Wavelength (nm) | Osc. Strength | Major contribs                              |
|---------------|----------------------------|-----------------|---------------|---------------------------------------------|
| 1             | 11734.64144                | 852.17772       | 0.0203        | H>L (97%)                                   |
| 2             | 16097.32448                | 621.22125       | 0.2446        | H-2>L (18%)<br>H-1>L (80%)                  |
| 3             | 16447.37152                | 607.99989       | 0.0006        | H-3>L (98%)                                 |
| 4             | 17449.11904                | 573.09484       | 0.3539        | H-2>L (79%)<br>H-1>L (17%)                  |
| 5             | 20066.40624                | 498.34534       | 0.0531        | H-7>L (12%)<br>H-4>L (72%)                  |
| 6             | 20972.17312                | 476.82231       | 0.1068        | H-5>L (74%)                                 |
| 7             | 21234.30512                | 470.93606       | 0.0117        | H-8>L (88%)<br>H-10>L (10%)                 |
| 8             | 21446.43040                | 466.27806       | 0.0286        | H-7>L (12%)<br>H-6>L (50%)<br>H-7>L (55%)   |
| 9             | 22023.12080                | 454.06825       | 0.0213        | H-6>L (21%)<br>H-5>L (16%)<br>H-10>L (27%)  |
| 10            | 22152.17040                | 451.42304       | 0.0172        | H-9>L (47%)<br>H-6>L (12%)<br>H-11>L (23%)  |
| 11            | 22940.98608                | 435.90105       | 0.0354        | H-10>L (34%)<br>H-9>L (31%)<br>H-11>L (61%) |
| 12            | 23191.01968                | 431.20139       | 0.0081        | H-10>L (22%)                                |
| 13            | 23926.60240                | 417.94484       | 0.0113        | H-13>L (80%)                                |

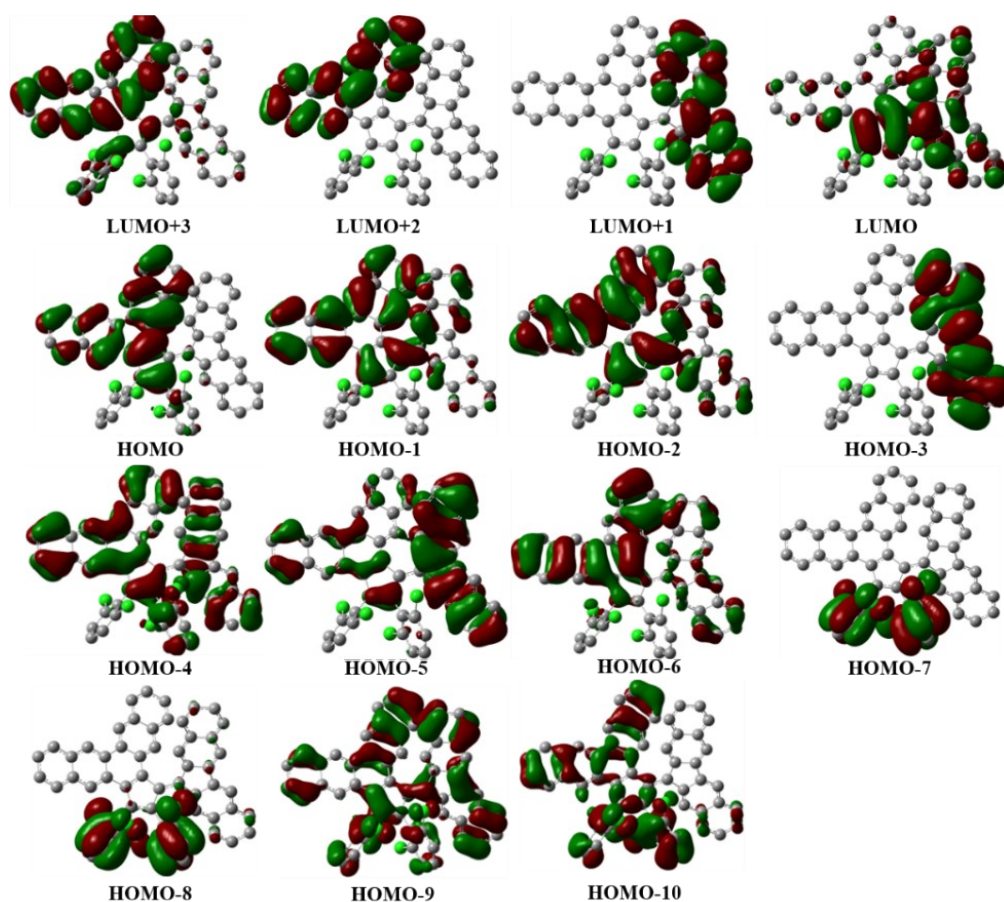**Figure S8.** Calculated MOs profiles of **NBF-DCP** at the B3LYP/6-31G(d,p) level.

**Table S6.** Major electronic transitions of NBF-DCP calculated by TD-DFT method.

| excited state | Energy (cm <sup>-1</sup> ) | Wavelength (nm) | Osc. Strength | Major contribs                                |
|---------------|----------------------------|-----------------|---------------|-----------------------------------------------|
| 1             | 11329.74832                | 882.63214       | 0.0207        | H>L (95%)                                     |
| 2             | 15551.28336                | 643.03375       | 0.0178        | H-2>L (28%)<br>H-1>L (71%)                    |
| 3             | 17381.36800                | 575.32871       | 0.4049        | H-2>L (64%)<br>H-1>L (24%)                    |
| 4             | 17879.82208                | 559.28968       | 0.0888        | H-3>L (87%)                                   |
| 5             | 22567.54880                | 443.11414       | 0.0381        | H-4>L (88%)                                   |
| 6             | 22806.29056                | 438.47552       | 0.0850        | H-5>L (87%)                                   |
| 7             | 23132.94736                | 432.28387       | 0.0076        | H>L+1 (97%)                                   |
| 8             | 24463.77136                | 408.76772       | 0.0010        | H>L+2 (87%)                                   |
| 9             | 25032.39616                | 399.48233       | 0.0151        | H-6>L (77%)<br>H-8>L (27%)                    |
| 10            | 25301.78720                | 395.22900       | 0.0042        | H-7>L (69%)<br>H-9>L (13%)                    |
| 11            | 25755.07392                | 388.27301       | 0.0154        | H-2>L+1 (20%)<br>H-1>L+1 (45%)                |
| 12            | 26153.51456                | 382.35779       | 0.0014        | H-8>L (61%)<br>H-7>L (27%)<br>H-9>L (59%)     |
| 13            | 26834.25120                | 372.65806       | 0.0071        | H-1>L+1 (13%)<br>H>L+3 (12%)<br>H-2>L+1 (30%) |
| 14            | 27102.02912                | 368.97606       | 0.0236        | H-1>L+1 (17%)<br>H>L+3 (38%)                  |
| 15            | 27277.85920                | 366.59768       | 0.0055        | H-10>L (67%)<br>H-2>L+1 (15%)                 |

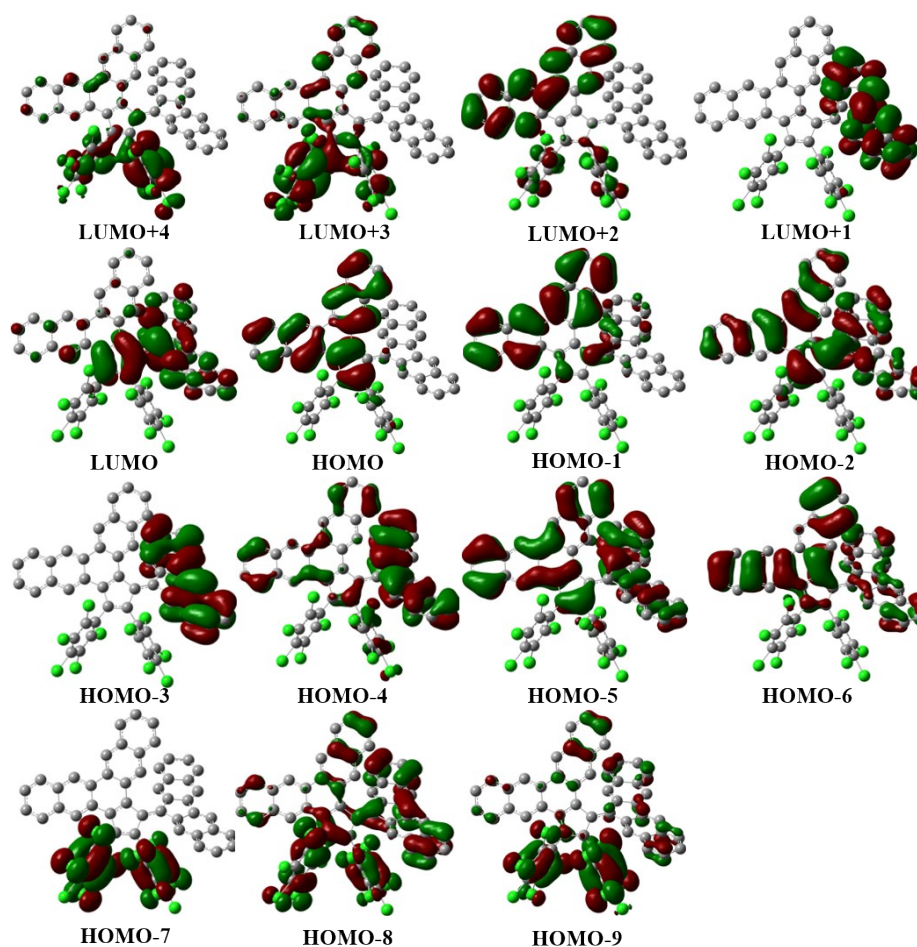**Figure S9.** Calculated MOs profiles of NBF-PCP at the B3LYP/6-31G(d,p) level.



**Table S7.** Major electronic transitions of **NBF-PCP** calculated by TD-DFT method.

| excited state | Energy (cm <sup>-1</sup> ) | Wavelength (nm) | Osc. Strength | Major contribs                            |
|---------------|----------------------------|-----------------|---------------|-------------------------------------------|
| 1             | 11091.81312                | 901.56586       | 0.0210        | H>L (95%)                                 |
| 2             | 14749.56272                | 677.98620       | 0.0136        | H-1>L (90%)                               |
| 3             | 16937.76000                | 590.39684       | 0.2002        | H-3>L (47%)<br>H-2>L (46%)                |
| 4             | 17261.19056                | 579.33431       | 0.2878        | H-3>L (49%)<br>H-2>L (43%)                |
| 5             | 22182.01312                | 450.81571       | 0.0889        | H-4>L (90%)                               |
| 6             | 22349.77760                | 447.43175       | 0.0433        | H-5>L (90%)                               |
| 7             | 23528.16176                | 425.02258       | 0.0158        | H>L+1 (98%)                               |
| 8             | 24354.88576                | 410.59523       | 0.0189        | H-6>L (84%)                               |
| 9             | 24929.15648                | 401.13672       | 0.0020        | H>L+2 (85%)                               |
| 10            | 25384.86288                | 393.93555       | 0.0286        | H>L+3 (92%)<br>H-9>L (26%)                |
| 11            | 25476.81072                | 392.51381       | 0.0014        | H-8>L (18%)<br>H-7>L (54%)<br>H-8>L (39%) |
| 12            | 25818.79216                | 387.31479       | 0.0032        | H-2>L+1 (22%)<br>H-1>L+1 (18%)            |
| 13            | 26175.29168                | 382.03968       | 0.0012        | H-9>L (45%)<br>H-7>L (37%)                |
| 14            | 26330.15120                | 379.79273       | 0.0681        | H>L+4 (91%)<br>H-9>L (15%)                |
| 15            | 26682.61792                | 374.77582       | 0.0419        | H-8>L (23%)<br>H-1>L+1 (39%)              |

### Differential pulse voltammograms

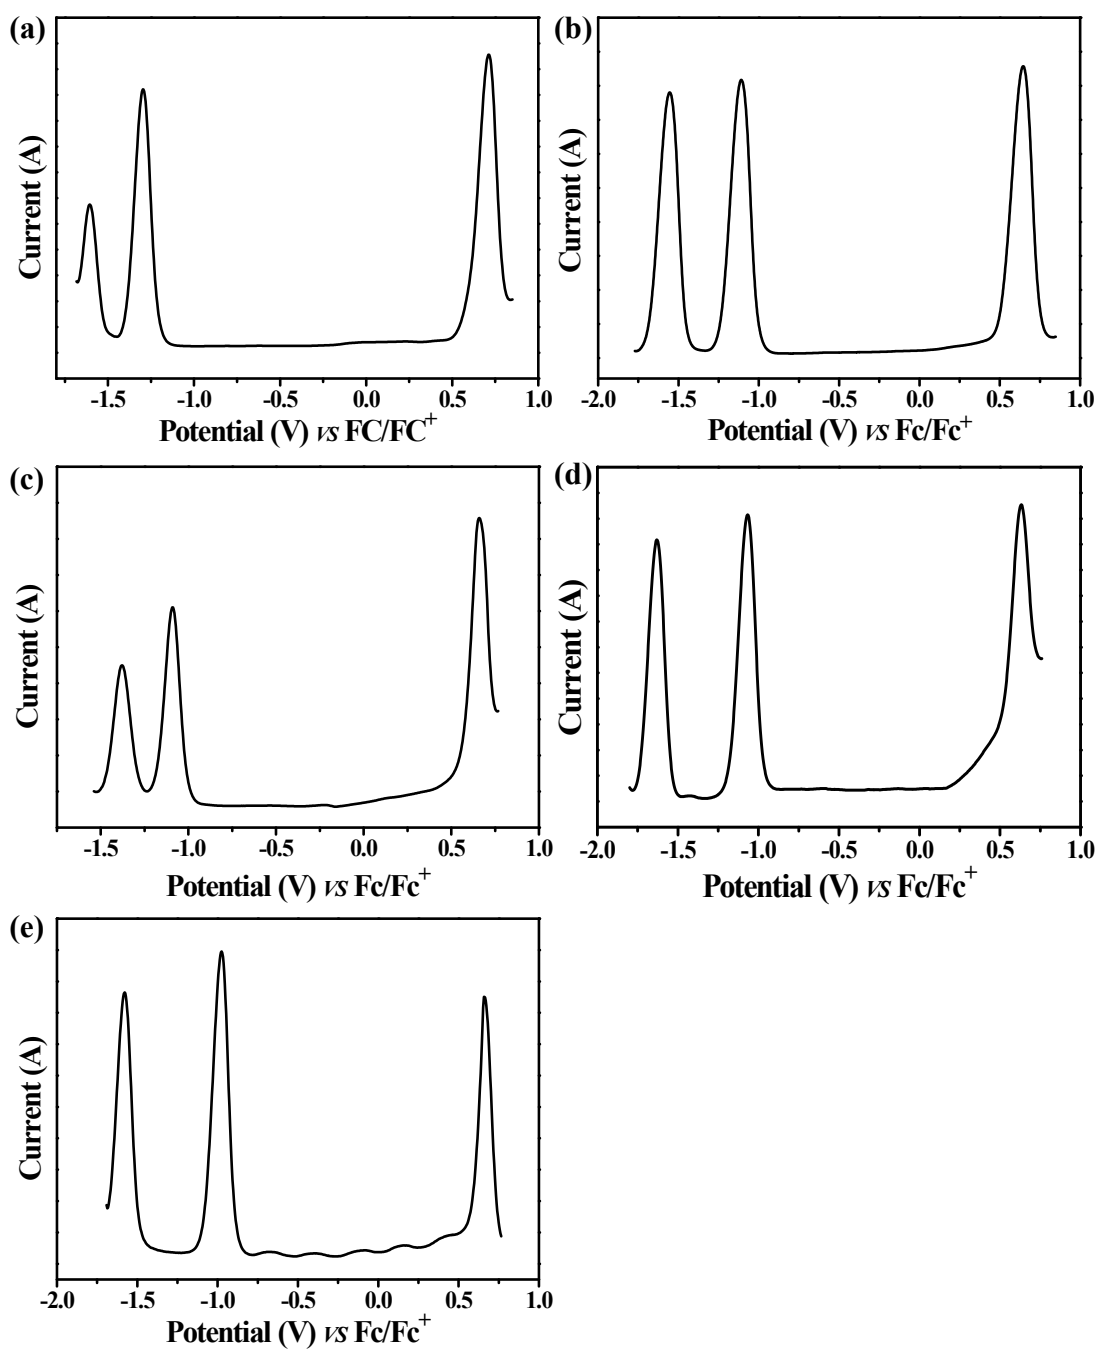

**Figure S10.** Differential pulse voltammograms of **PBF-Mes**, **NBF-Mes**, **SBF-Mes**, **NBF-DCP** and **NBF-PCP** in DCM (1.0 mM); redox potentials were determined by using 0.10 M *n*-Bu<sub>4</sub>N<sup>+</sup>PF<sub>6</sub><sup>-</sup> as a supporting electrolyte; the electrode potential was externally calibrated by the ferrocene/ferrocenium redox couple.

## Characterization of NBF-PCP radical ions

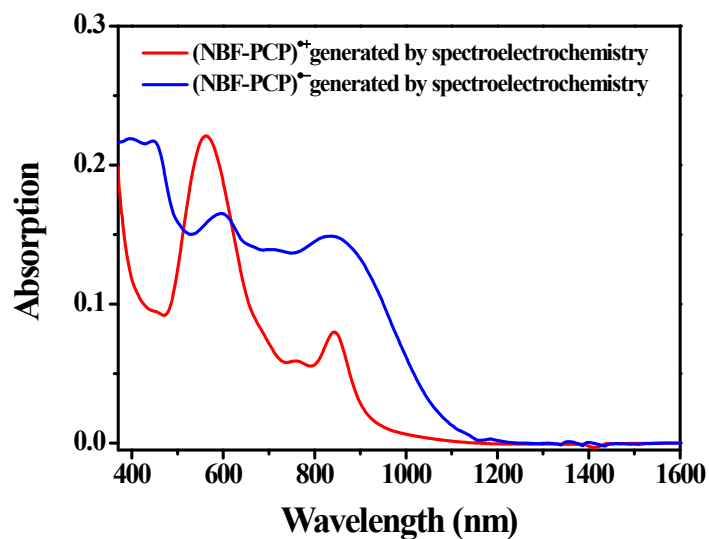

**Figure S11.** UV-*vis*-NIR spectra of (NBF-PCP)<sup>•+</sup> and (NBF-PCP)<sup>•-</sup> by in-situ measurement of one-electron oxidation and reduction of NBF-PCP through the electrochemistry (DCM solution containing 0.10 M *n*-Bu<sub>4</sub><sup>+</sup>NPF<sub>6</sub><sup>-</sup>).

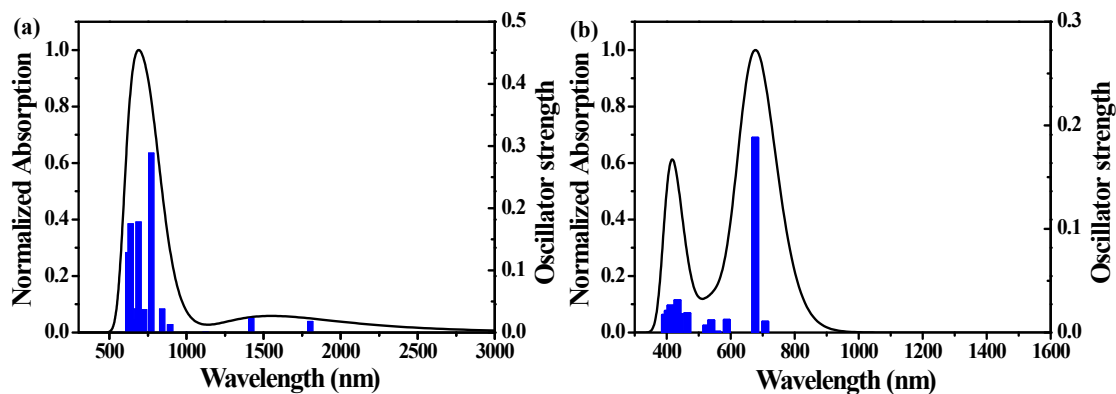

**Figure S12.** Calculated absorption spectra of (NBF-PCP)<sup>•+</sup> at the UM06/6-31G(d,p) level (a) and (NBF-PCP)<sup>•-</sup> at the CAM-B3LYP/6-31G(d,p) level (b).

**Table S8.** Major electronic transitions of (NBF-PCP)<sup>•+</sup> calculated by TD-DFT method.

| excited state | Energy (cm <sup>-1</sup> ) | Wavelength (nm) | Osc. Strength | Major contribs                                                |
|---------------|----------------------------|-----------------|---------------|---------------------------------------------------------------|
| 1             | 5546.71312                 | 1802.86952      | 0.0179        | H-2(B)>L(B) (19%)<br>H(B)>L(B) (75%)                          |
| 2             | 7044.49504                 | 1419.54816      | 0.0227        | H-2(B)>L(B) (77%)<br>H(B)>L(B) (20%)<br>H-2(A)>L(A) (29%)     |
| 3             | 8899.58304                 | 1123.64815      | 0.0010        | H-1(A)>L(A) (13%)<br>H-2(B)>L+1(B) (20%)<br>H(B)>L+1(B) (29%) |
| 4             | 10000.53744                | 999.94626       | 0.0003        | H-1(B)>L(B) (85%)                                             |

|    |             |           |        |                                                                                       |
|----|-------------|-----------|--------|---------------------------------------------------------------------------------------|
| 5  | 11188.60032 | 893.76684 | 0.0128 | H-1(A)>L(A) (36%)<br>H(A)>L(A) (31%)<br>H-1(B)>L(B) (10%)<br>H-1(B)>L+1(B) (14%)      |
| 6  | 11879.01568 | 841.82059 | 0.0379 | H-3(A)>L(A) (19%)<br>H-2(A)>L(A) (11%)<br>H(A)>L(A) (45%)<br>H-2(A)>L(A) (14%)        |
| 7  | 12966.25856 | 771.2325  | 0.2887 | H-4(B)>L(B) (56%)<br>H(B)>L+1(B) (16%)<br>H-4(A)>L(A) (20%)                           |
| 8  | 13807.50064 | 724.24404 | 0.0372 | H-1(A)>L(A) (12%)<br>H-1(B)>L+1(B) (48%)<br>H-4(A)>L(A) (16%)                         |
| 9  | 14013.17344 | 713.61423 | 0.0055 | H-3(B)>L(B) (33%)<br>H-3(B)>L+1(B) (21%)<br>H-1(B)>L+1(B) (13%)<br>H-3(A)>L(A) (25%)  |
| 10 | 14514.85376 | 688.94941 | 0.1779 | H-1(A)>L(A) (18%)<br>H(A)>L(A) (12%)<br>H-4(B)>L(B) (12%)<br>H(B)>L+1(B) (18%)        |
| 11 | 14767.30704 | 677.17154 | 0.0379 | H-3(A)>L(A) (27%)<br>H-2(A)>L(A) (21%)<br>H-4(B)>L(B) (12%)<br>H-3(B)>L(B) (10%)      |
| 12 | 15347.22368 | 651.58365 | 0.0200 | H(B)>L+1(B) (20%)<br>H-4(A)>L(A) (13%)<br>H-3(A)>L(A) (11%)<br>H-3(B)>L(B) (42%)      |
| 13 | 15690.01168 | 637.34816 | 0.1751 | H-3(B)>L+1(B) (11%)<br>H-2(A)>L(A) (12%)<br>H-2(B)>L+1(B) (59%)<br>H-10(B)>L(B) (14%) |
| 14 | 16073.12768 | 622.15645 | 0.1288 | H-8(B)>L(B) (17%)<br>H-5(B)>L(B) (50%)<br>H-5(A)>L(A) (20%)                           |
| 15 | 17703.18544 | 564.87009 | 0.0004 | H-6(B)>L(B) (26%)<br>H-4(B)>L+1(B) (12%)                                              |

**Table S9.** Major electronic transitions of (NBF-PCP)<sup>-</sup> calculated by TD-DFT method.

| excited state | Energy (cm <sup>-1</sup> ) | Wavelength (nm) | Osc. Strength | Major contribs                                                |
|---------------|----------------------------|-----------------|---------------|---------------------------------------------------------------|
| 1             | 14,131.73776               | 707.62706       | 0.0105        | H-1(B)>L(B) (15%)<br>H(B)>L(B) (53%)                          |
| 2             | 14,781.82512               | 676.50645       | 0.1880        | H-1(B)>L(B) (75%)<br>H(B)>L(B) (10%)                          |
| 3             | 17,019.22256               | 587.57090       | 0.0121        | H-3(A)>L+1(A) (16%)<br>H-2(B)>L+2(B) (10%)<br>H(B)>L(B) (28%) |
| 4             | 17,897.56640               | 558.73518       | 0.0007        | H-4(A)>L(A) (21%)<br>H-4(B)>L(B) (16%)<br>H-3(B)>L+1(B) (14%) |
| 5             | 18,550.07344               | 539.08142       | 0.0116        | H-1(A)>L+1(A) (15%)<br>H(B)>L+2(B) (12%)                      |
| 6             | 19,100.95392               | 523.53406       | 0.0066        | H(A)>L(A) (69%)                                               |

|    |              |           |        |                                        |
|----|--------------|-----------|--------|----------------------------------------|
| 7  | 21,549.67008 | 464.04423 | 0.0185 | H-3(B)>L(B) (69%)                      |
| 8  | 22,723.21488 | 440.07857 | 0.0177 | H(A)>L+1(A) (24%)<br>H(A)>L+2(A) (22%) |
| 9  | 23,067.61600 | 433.50817 | 0.0310 | H(A)>L+1(A) (16%)<br>H(A)>L+2(A) (24%) |
| 10 | 24,505.71248 | 408.06812 | 0.0120 | H-4(A)>L(A) (15%)<br>H-4(B)>L(B) (61%) |
| 11 | 24,796.07408 | 403.28965 | 0.0208 | H(A)>L+4(A) (30%)<br>H(A)>L+1(A) (20%) |
| 12 | 25,346.14800 | 394.53727 | 0.0170 | H(B)>L+1(B) (11%)<br>H(B)>L+2(B) (14%) |

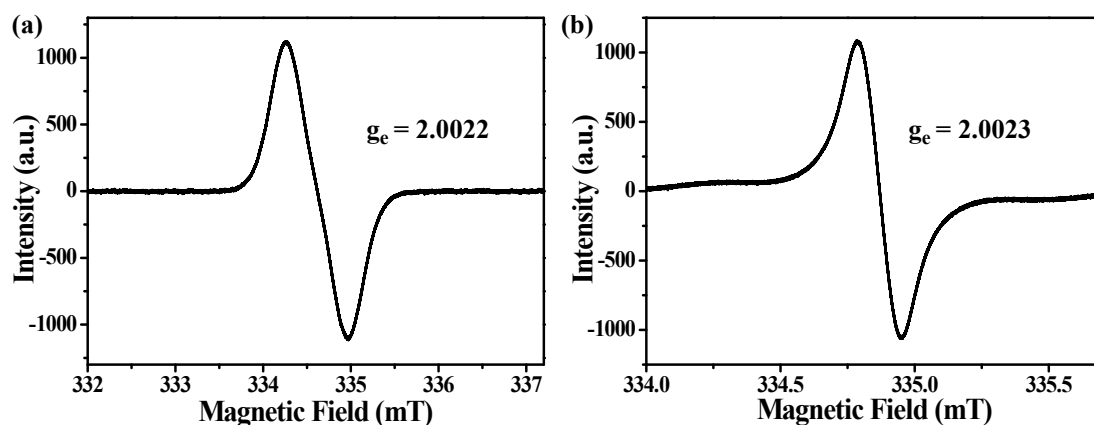

**Figure S13.** ESR spectra of (NBF-PCP)<sup>+</sup>[SbF<sub>6</sub><sup>-</sup>] (a) and (NBF-PCP)<sup>-</sup>[CoCp<sub>2</sub><sup>+</sup>] (b) recorded in air-degassed DCM solution at room temperature.

## OFET devices

### Thin film deposition and device fabrication

Heavily doped silicon substrates with a 300 nm SiO<sub>2</sub> dielectric modified with octadecyl trichlorosilane (OTS) through thermal vapor at 150 °C were used for the device fabrication. A homogeneous layer of NBF-PCP was spin-coated from chlorobenzene solution (5 mg mL<sup>-1</sup>). Source and drain gold electrodes were thermal vapor deposited at a thickness of 50 nm. The channel length and width were estimated as 20 μm and 1000 μm, respectively.

### The parameters of charge carrier mobilities

The charge carrier mobilities of OFETs were calculated in the saturation regime from a plot of the square root of the drain current vs. gate voltage using the following equation:

$$I_{DS} = \frac{WC_i}{2L} \mu (V_G - V_T)^2$$

where  $I_{DS}$  is the drain-source current,  $C_i$  is the capacitance per unit area of the gate dielectric (10 nF/cm<sup>2</sup>),  $L$  is the channel length,  $W$  is the channel width,  $V_G$  and  $V_T$  are the gate-source voltage and threshold voltage, respectively.

---

## Crystal data and Structural Refinement

**Table S10.** Crystal data and structure refinement for **PBF-Mes** (CCDC:1975936).

---

|                                   |                                             |
|-----------------------------------|---------------------------------------------|
| Identification code               | <b>PBF-Mes</b>                              |
| Empirical formula                 | C <sub>48</sub> H <sub>38</sub>             |
| Formula weight                    | 614.78                                      |
| Temperature                       | 296.15 K                                    |
| Wavelength                        | 0.71073 Å                                   |
| Crystal system                    | Monoclinic                                  |
| Space group                       | P 1 2/n 1                                   |
| a                                 | 17.963(3) Å                                 |
| b                                 | 8.2911(13) Å                                |
| c                                 | 25.855(4) Å                                 |
| α                                 | 90°                                         |
| β                                 | 104.810(3)°                                 |
| γ                                 | 90°                                         |
| Volume                            | 3722.7(10) Å <sup>3</sup>                   |
| Z                                 | 4                                           |
| Density (calculated)              | 1.097 Mg/m <sup>3</sup>                     |
| Absorption coefficient            | 0.062 mm <sup>-1</sup>                      |
| F(000)                            | 1304                                        |
| Crystal size                      | 0.1 x 0.05 x 0.03 mm <sup>3</sup>           |
| Theta range for data collection   | 1.629 to 25.500°.                           |
| Index ranges                      | -14<=h<=21, -10<=k<=9, -31<=l<=31           |
| Reflections collected             | 24085                                       |
| Independent reflections           | 6895 [R(int) = 0.0910]                      |
| Completeness to theta = 25.242°   | 99.70%                                      |
| Absorption correction             | Semi-empirical from equivalents             |
| Max. and min. transmission        | 0.7456 and 0.6133                           |
| Refinement method                 | Full-matrix least-squares on F <sup>2</sup> |
| Data / restraints / parameters    | 6895/1/440                                  |
| Goodness-of-fit on F <sup>2</sup> | 0.999                                       |
| Final R indices [I>2σ(I)]         | R1 = 0.0652, wR2 = 0.1468                   |
| R indices (all data)              | R1 = 0.1575, wR2 = 0.1906                   |
| Extinction coefficient            | 0.0041(7)                                   |
| Largest diff. peak and hole       | 0.277 and -0.178 e.Å <sup>-3</sup>          |

---

**Table S11.** Crystal data and structure refinement for compound **3a** (CCDC:1975939).

---

|                     |                                   |
|---------------------|-----------------------------------|
| Identification code | <b>3a</b>                         |
| Empirical formula   | C <sub>48</sub> H <sub>38</sub> O |
| Formula weight      | 630.78                            |
| Temperature         | 293(2) K                          |
| Wavelength          | 0.71073 Å                         |
| Crystal system      | Triclinic                         |
| Space group         | P -1                              |
| a                   | 11.2454(12) Å                     |
| b                   | 17.5859(19) Å                     |
| c                   | 19.671(2) Å                       |
| α                   | 87.747(3)°                        |
| β                   | 66.860(3)°                        |
| γ                   | 61.993(2)°                        |
| Volume              | 3516.0(7) Å <sup>3</sup>          |

---

|                                   |                                             |
|-----------------------------------|---------------------------------------------|
| Z                                 | 4                                           |
| Density (calculated)              | 1.192 Mg/m <sup>3</sup>                     |
| Absorption coefficient            | 0.069 mm <sup>-1</sup>                      |
| F(000)                            | 1336                                        |
| Crystal size                      | 0.200 x 0.150 x 0.100 mm <sup>3</sup>       |
| Theta range for data collection   | 1.863 to 24.999°                            |
| Index ranges                      | -13<=h<=13, -20<=k<=13, -23<=l<=18          |
| Reflections collected             | 19643                                       |
| Independent reflections           | 12381 [R(int) = 0.0533]                     |
| Completeness to theta = 25.242°   | 97.30%                                      |
| Absorption correction             | Semi-empirical from equivalents             |
| Max. and min. transmission        | 0.7456 and 0.6347                           |
| Refinement method                 | Full-matrix least-squares on F <sup>2</sup> |
| Data / restraints / parameters    | 12381/387/1157                              |
| Goodness-of-fit on F <sup>2</sup> | 1.032                                       |
| Final R indices [I>2sigma(I)]     | R1 = 0.0950, wR2 = 0.2394                   |
| R indices (all data)              | R1 = 0.2185, wR2 = 0.3045                   |
| Extinction coefficient            | 0.0015(8)                                   |
| Largest diff. peak and hole       | 0.357 and -0.262 e.Å <sup>-3</sup>          |

**Table S12.** Crystal data and structure refinement for **NBF-Mes** (CCDC:1975937)

|                                   |                                             |
|-----------------------------------|---------------------------------------------|
| Identification code               | <b>NBF-Mes</b>                              |
| Empirical formula                 | C <sub>64</sub> H <sub>46</sub>             |
| Formula weight                    | 815.01                                      |
| Temperature                       | 173(2) K                                    |
| Wavelength                        | 0.71073 Å                                   |
| Crystal system                    | Triclinic                                   |
| Space group                       | P-1                                         |
| a                                 | 17.0406(16) Å                               |
| b                                 | 17.1796(17) Å                               |
| c                                 | 21.2035(19) Å                               |
| α                                 | 87.747(3)°                                  |
| β                                 | 66.860(3)°                                  |
| γ                                 | 61.993(2)°                                  |
| Volume                            | 4958.2(8) Å <sup>3</sup>                    |
| Z                                 | 4                                           |
| Density (calculated)              | 1.092 Mg/m <sup>3</sup>                     |
| Absorption coefficient            | 0.062 mm <sup>-1</sup>                      |
| F(000)                            | 1720                                        |
| Crystal size                      | 0.18 x 0.16 x 0.10 mm <sup>3</sup>          |
| Theta range for data collection   | 1.542 to 25.000°                            |
| Index ranges                      | -20<=h<=20, -20<=k<=20, -25<=l<=25          |
| Reflections collected             | 74625                                       |
| Independent reflections           | 17409 [R(int) = 0.1218]                     |
| Completeness to theta = 25.242°   | 96.90%                                      |
| Absorption correction             | Semi-empirical from equivalents             |
| Max. and min. transmission        | 0.7456 and 0.4347                           |
| Refinement method                 | Full-matrix least-squares on F <sup>2</sup> |
| Data / restraints / parameters    | 17409/0/1162                                |
| Goodness-of-fit on F <sup>2</sup> | 1.083                                       |
| Final R indices [I>2sigma(I)]     | R1 = 0.0716, wR2 = 0.1811                   |
| R indices (all data)              | R1 = 0.1219, wR2 = 0.2134                   |
| Extinction coefficient            | 0.0048(6)                                   |

|                             |                                    |
|-----------------------------|------------------------------------|
| Largest diff. peak and hole | 0.313 and -0.260 e.Å <sup>-3</sup> |
|-----------------------------|------------------------------------|

**Table S13.** Crystal data and structure refinement for **SBF-Mes** (CCDC:1975938)

|                                   |                                             |
|-----------------------------------|---------------------------------------------|
| Identification code               | <b>SBF-Mes</b>                              |
| Empirical formula                 | C <sub>9</sub> H <sub>62</sub>              |
| Formula weight                    | 1215.45                                     |
| Temperature                       | 99.8(8) K                                   |
| Wavelength                        | 1.54184 Å                                   |
| Crystal system                    | Orthorhombic                                |
| Space group                       | Pccn                                        |
| a                                 | 14.9085(6) Å                                |
| b                                 | 32.282(2) Å                                 |
| c                                 | 28.907(2) Å                                 |
| α                                 | 90°                                         |
| β                                 | 90°                                         |
| γ                                 | 90°                                         |
| Volume                            | 13912.3(14) Å <sup>3</sup>                  |
| Z                                 | 8                                           |
| Density (calculated)              | 1.161 Mg/m <sup>3</sup>                     |
| Absorption coefficient            | 0.499 mm <sup>-1</sup>                      |
| F(000)                            | 5104                                        |
| Crystal size                      | 0.3x0.3x0.1 mm <sup>3</sup>                 |
| Theta range for data collection   | 3.606 to 66.598°                            |
| Index ranges                      | -16<=h<=18, -39<=k<=39, -35<=l<=35          |
| Reflections collected             | 12306                                       |
| Independent reflections           | 12306 [R(int) = 0.2086]                     |
| Completeness to theta = 66.598°   | 100.00%                                     |
| Absorption correction             | Semi-empirical from equivalents             |
| Max. and min. transmission        | 1.00000 and 0.50474                         |
| Refinement method                 | Full-matrix least-squares on F <sup>2</sup> |
| Data / restraints / parameters    | 12306/484/871                               |
| Goodness-of-fit on F <sup>2</sup> | 0.982                                       |
| Final R indices [I>2sigma(I)]     | R1 = 0.0890, wR2 = 0.2353                   |
| R indices (all data)              | R1 = 0.1568, wR2 = 0.2712                   |
| Extinction coefficient            | n/a                                         |
| Largest diff. peak and hole       | 1.006 and -0.281 e.Å <sup>-3</sup>          |

**Table S14.** Crystal data and structure refinement for **NBF-PCP** (CCDC:1975940).

|                      |                          |
|----------------------|--------------------------|
| Empirical formula    | <b>NBF-PCP</b>           |
| Formula weight       | 1075.27                  |
| Temperature          | 293(2) K                 |
| Wavelength           | 1.54184 Å                |
| Crystal system       | Triclinic                |
| Space group          | P-1                      |
| a                    | 8.4481(5) Å              |
| b                    | 17.6335(7) Å             |
| c                    | 19.2134(8) Å             |
| α                    | 103.740(4)               |
| β                    | 95.972(4)                |
| γ                    | 92.279(4)                |
| Volume               | 2759.2(2) Å <sup>3</sup> |
| Z                    | 2                        |
| Density (calculated) | 1.294 Mg/m <sup>3</sup>  |



|                                   |                                             |
|-----------------------------------|---------------------------------------------|
| Absorption coefficient            | 4.902 mm <sup>-1</sup>                      |
| F(000)                            | 1084                                        |
| Theta range for data collection   | 4.844 to 66.595°                            |
| Reflections collected             | 9697                                        |
| Completeness to theta = 66.595°   | 99.90%                                      |
| Refinement method                 | Full-matrix least-squares on F <sup>2</sup> |
| Data / restraints / parameters    | 9697/0/613                                  |
| Goodness-of-fit on F <sup>2</sup> | 1.089                                       |
| Final R indices [I > 2σ(I)]       | R1 = 0.1002, wR2 = 0.2773                   |
| R indices (all data)              | R1 = 0.1396, wR2 = 0.3293                   |
| Extinction coefficient            | n/a                                         |
| Largest diff. peak and hole       | 1.521 and -0.611 Å <sup>-3</sup>            |

### NMR/mass spectra for new compounds

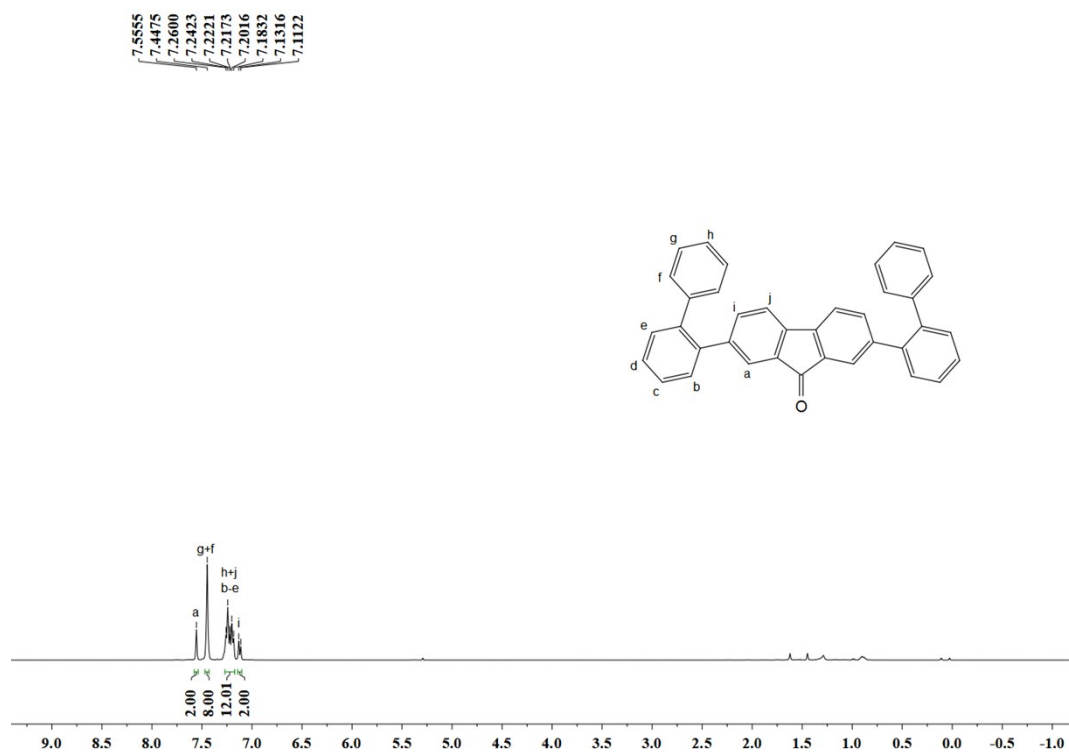

**Figure S14.** <sup>1</sup>H NMR spectrum (400 MHz) of compound S-3 in CDCl<sub>3</sub> at 298 K.

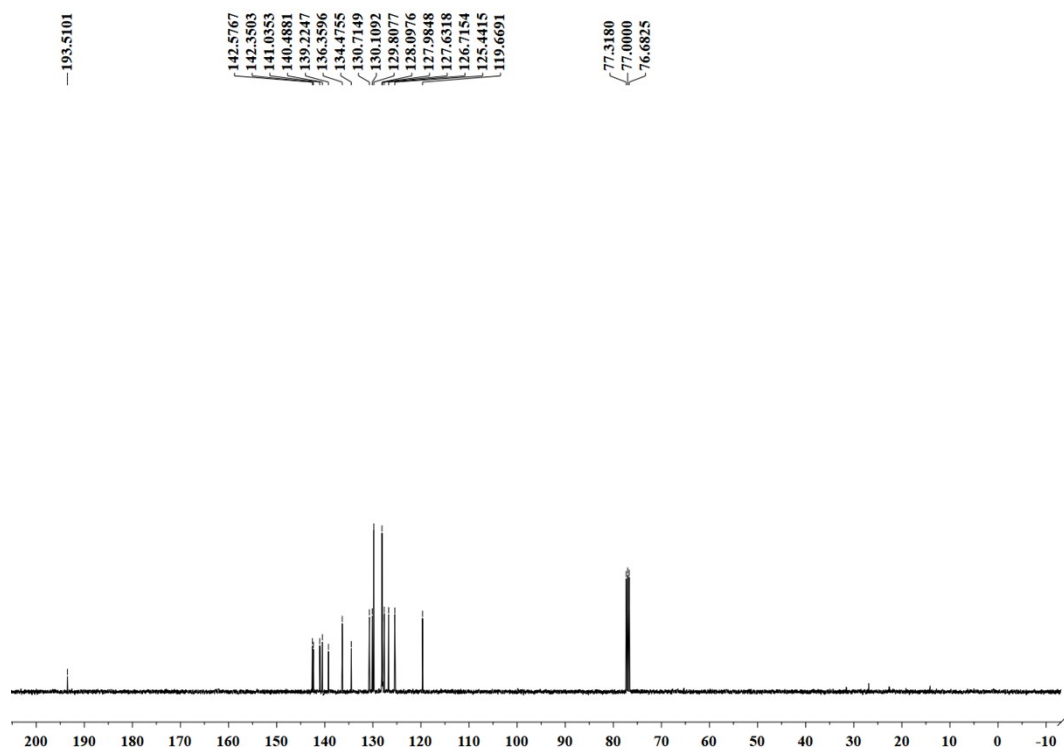

**Figure S15.**  $^{13}\text{C}$  NMR spectrum (100 MHz) of compound **S-3** in  $\text{CDCl}_3$  at 298 K.

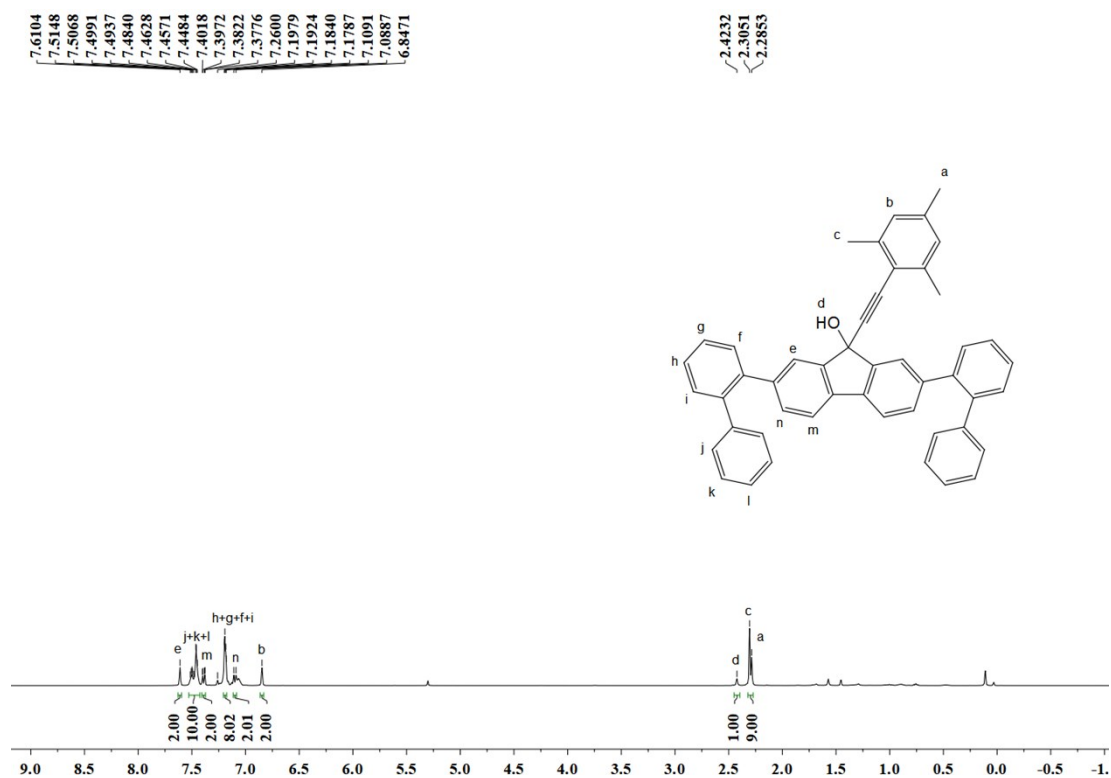

**Figure S16.**  $^1\text{H}$  NMR spectrum (400 MHz) of compound **1b** in  $\text{CDCl}_3$  at 298 K.

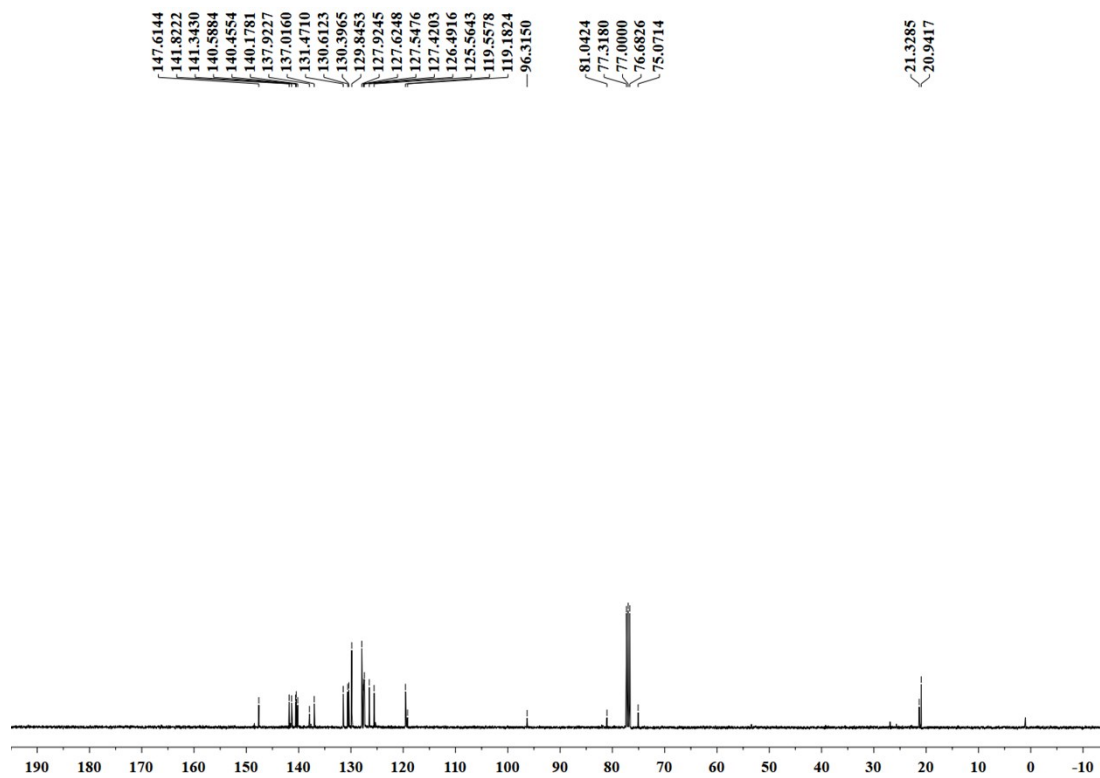

**Figure S17.**  $^{13}\text{C}$  NMR spectrum (100 MHz) of compound **1b** in  $\text{CDCl}_3$  at 298 K.

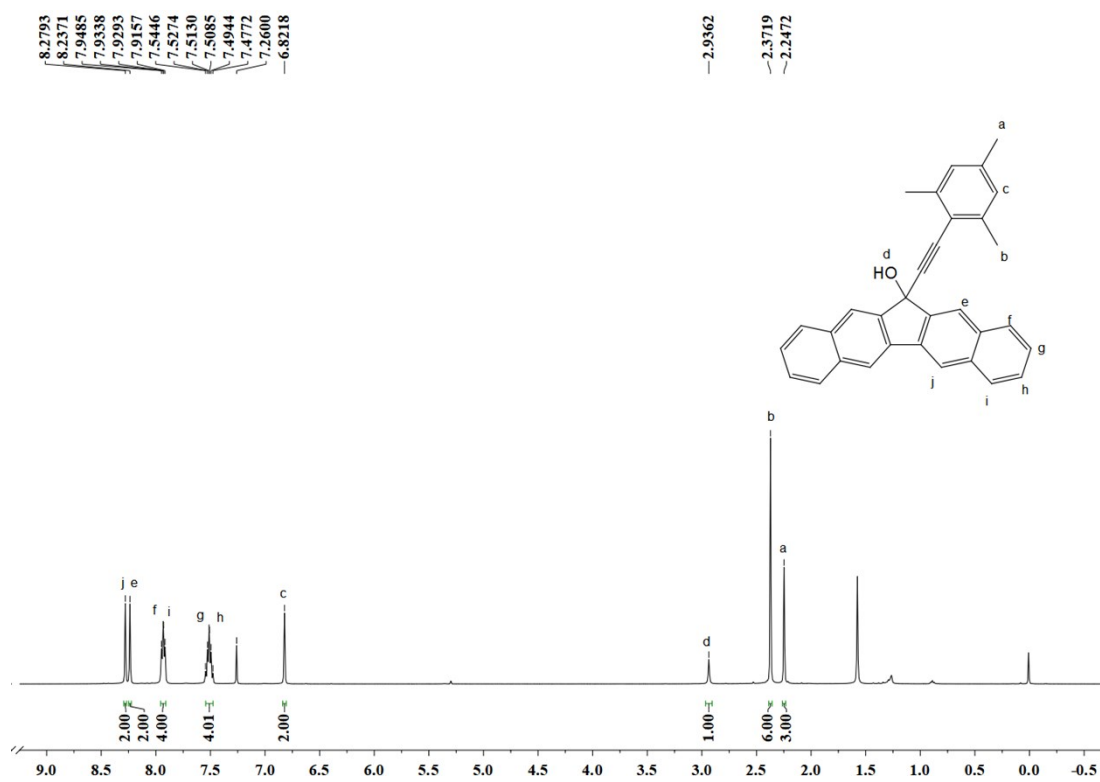

**Figure S18.**  $^1\text{H}$  NMR spectrum (400 MHz) of compound **1c** in  $\text{CDCl}_3$  at 298 K.

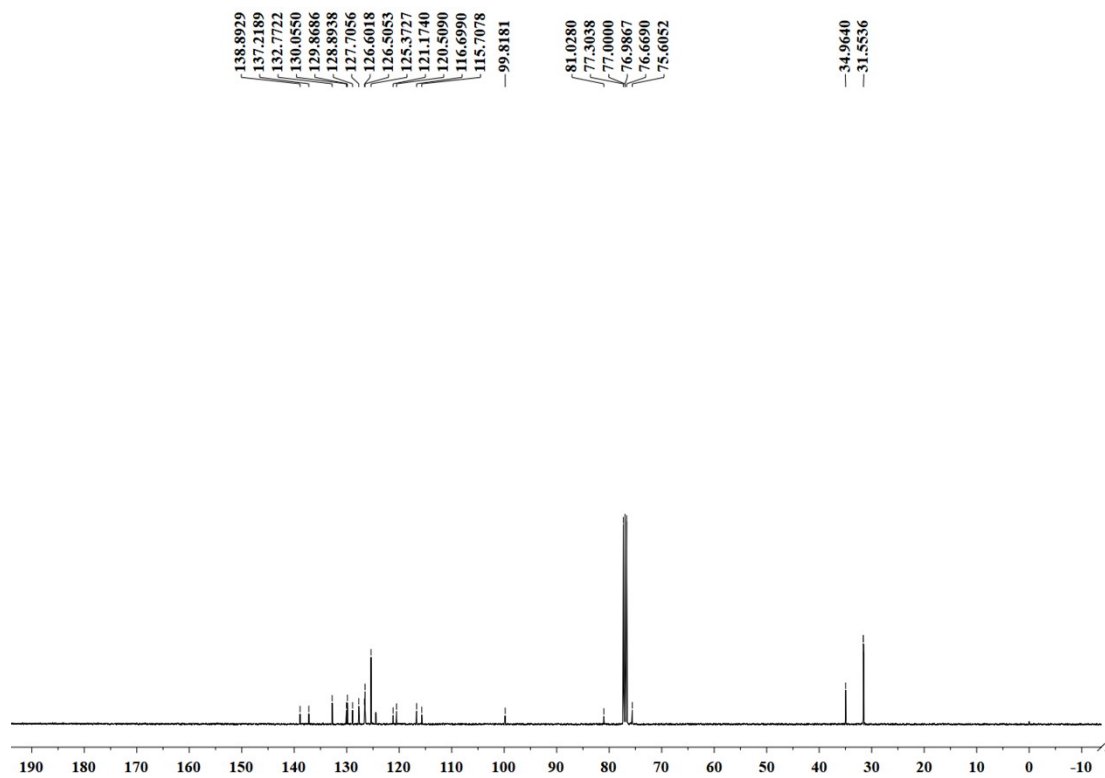

**Figure S19.**  $^{13}\text{C}$  NMR spectrum (100 MHz) of compound **1c** in  $\text{CDCl}_3$  at 298 K.

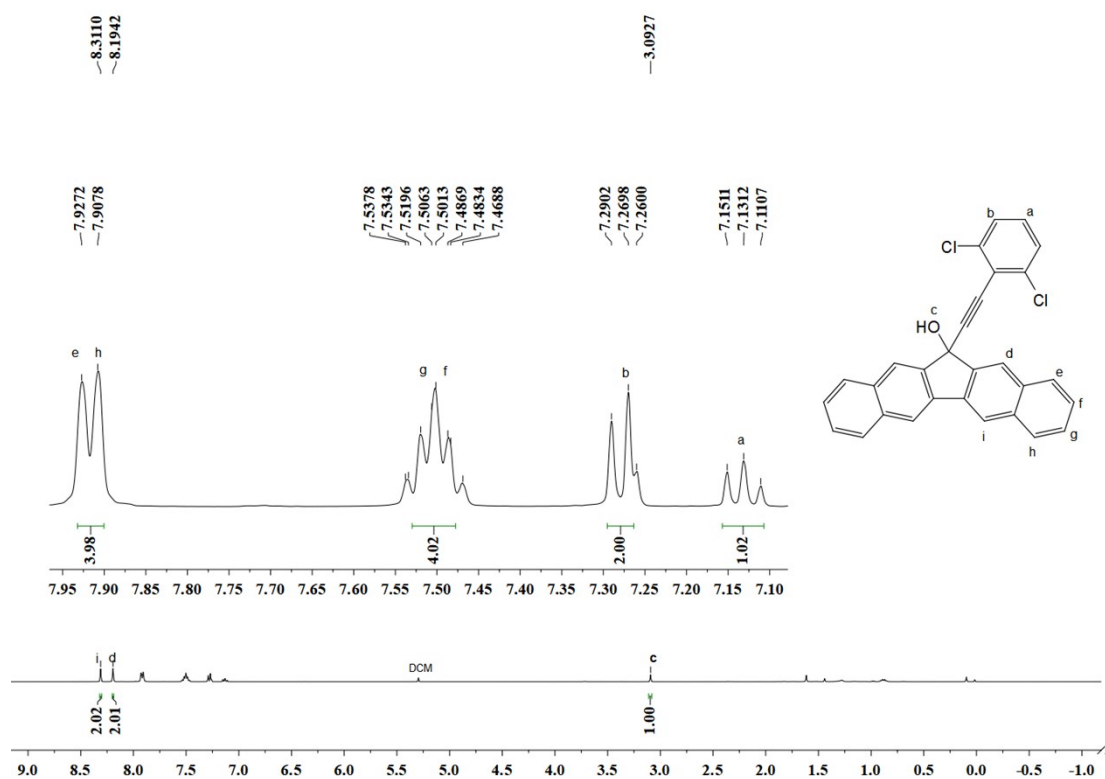

**Figure S20.**  $^1\text{H}$  NMR spectrum (400 MHz) of compound **1d** in  $\text{CDCl}_3$  at 298 K.

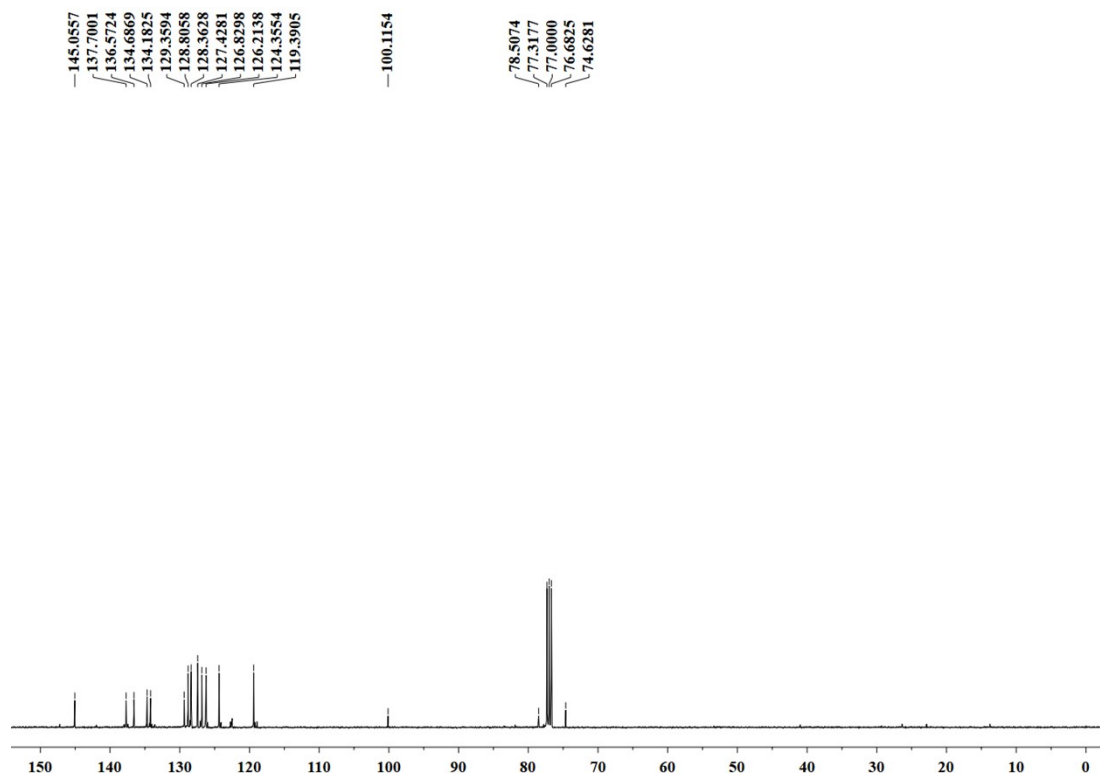

**Figure S21.**  $^{13}\text{C}$  NMR spectrum (100 MHz) of compound **1d** in  $\text{CDCl}_3$  at 298 K.

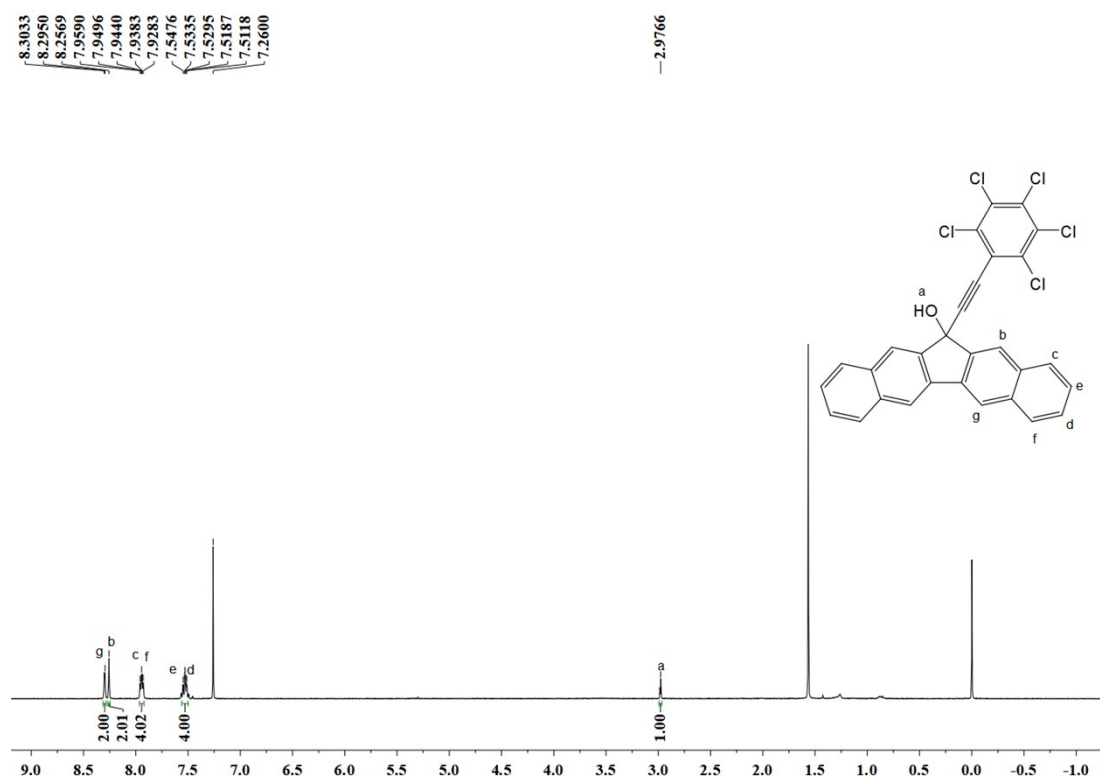

**Figure S22.**  $^1\text{H}$  NMR spectrum (400 MHz) of compound **1e** in  $\text{CDCl}_3$  at 298 K.

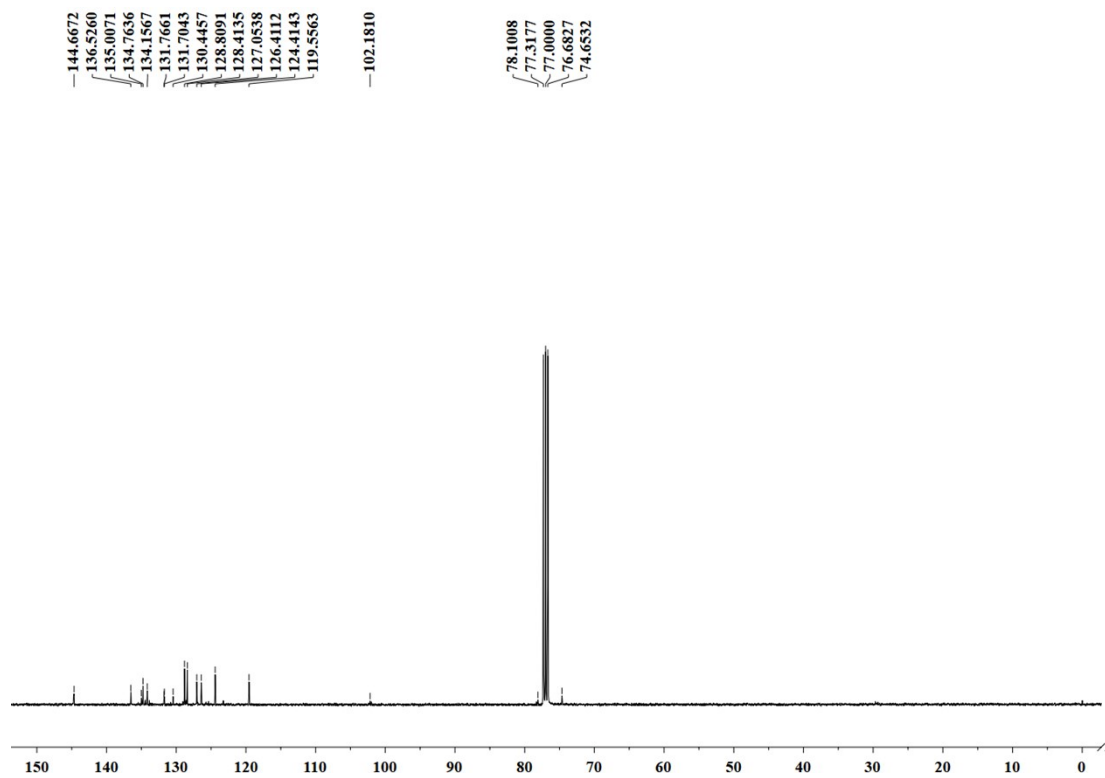

**Figure S23.**  $^{13}\text{C}$  NMR spectrum (100 MHz) of compound **1e** in  $\text{CDCl}_3$  at 298 K.

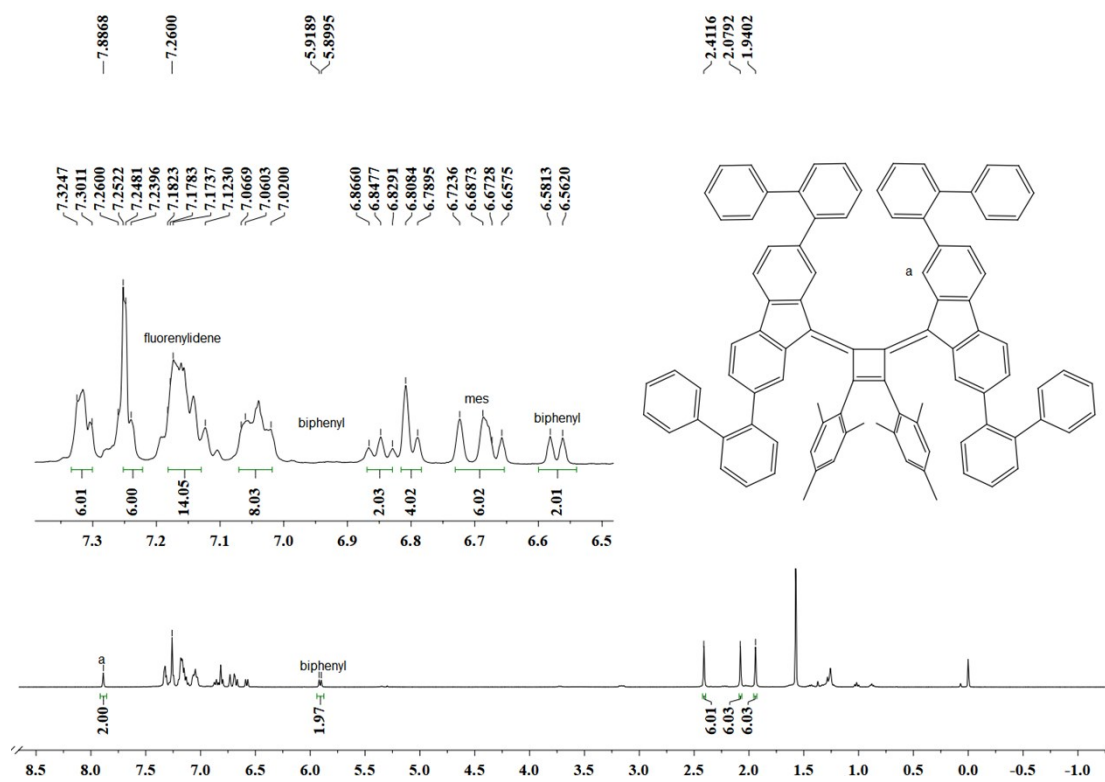

**Figure S24.**  $^1\text{H}$  NMR spectrum (400 MHz) of compound **2b** in  $\text{CDCl}_3$  at 298 K.

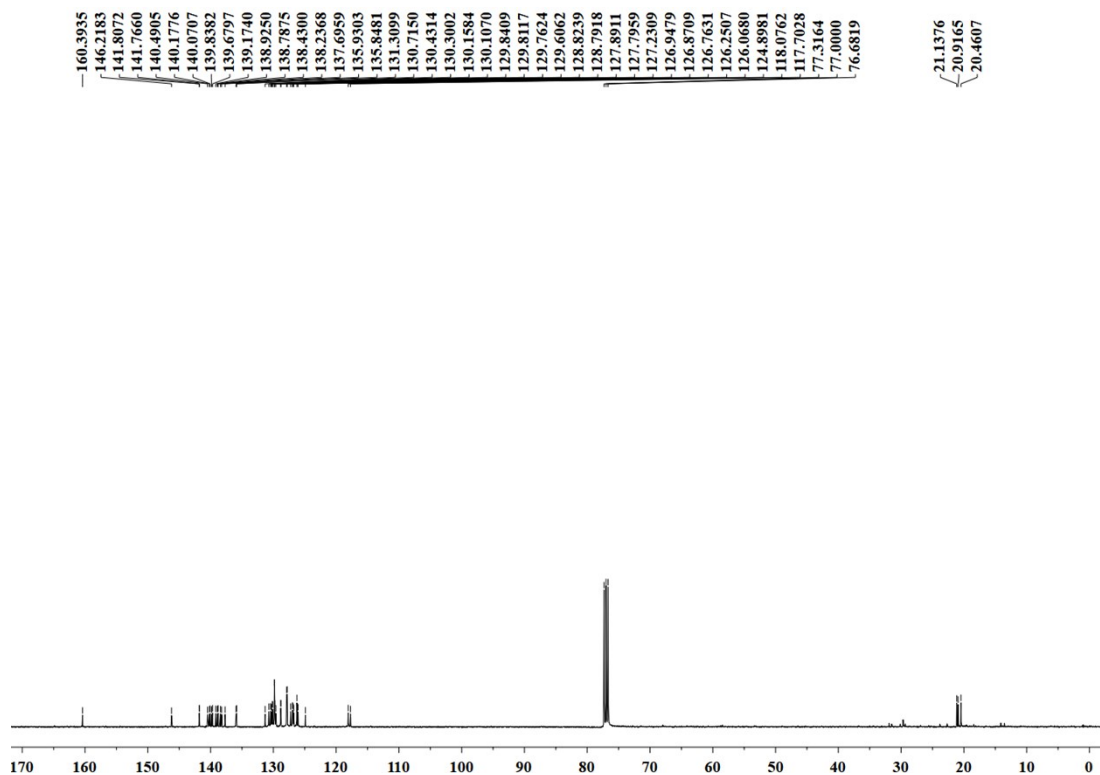

Figure S25.  $^{13}\text{C}$  NMR spectrum (100 MHz) of compound **2b** in  $\text{CDCl}_3$  at 298 K.

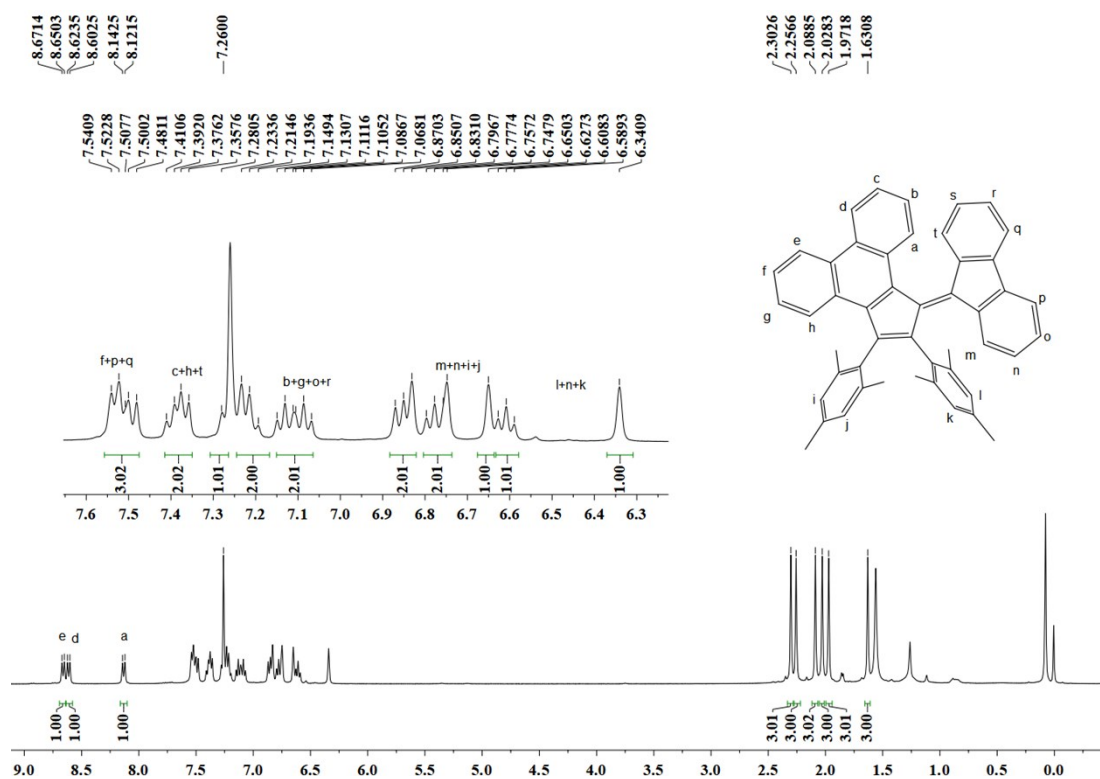

Figure S26.  $^1\text{H}$  NMR spectrum (400 MHz) of compound **PBF-Mes** in  $\text{CDCl}_3$  at 298 K.

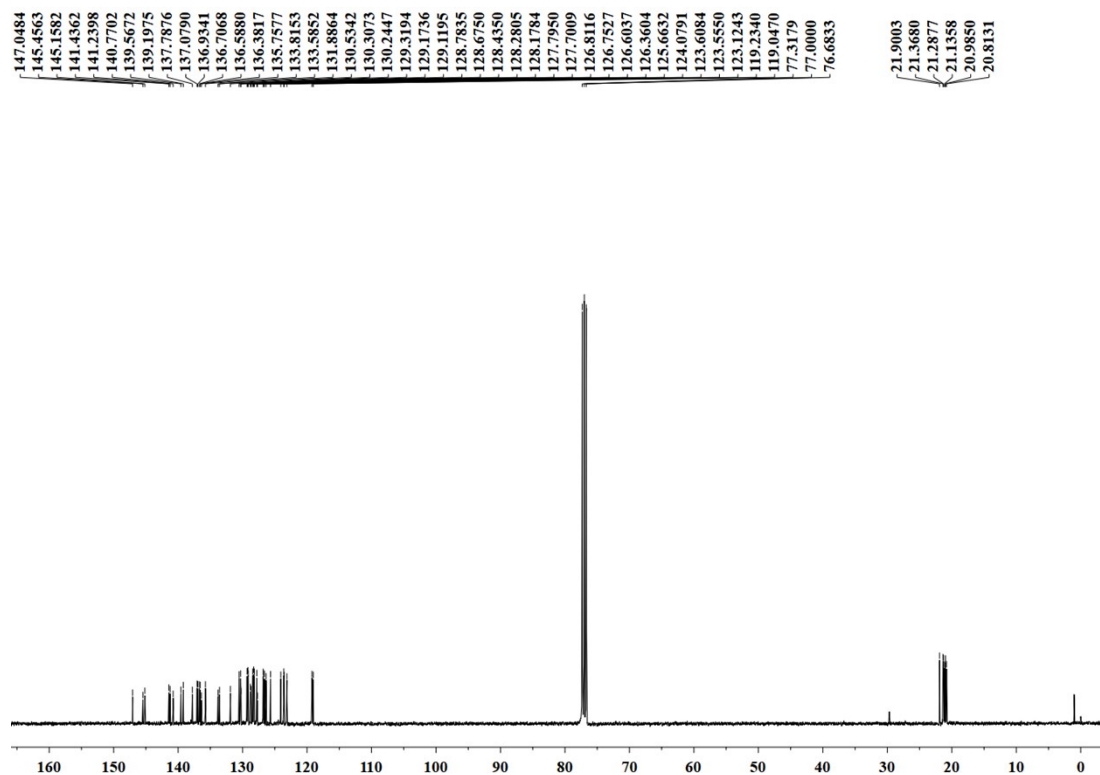

**Figure S27.**  $^{13}\text{C}$  NMR spectrum (100 MHz) of compound **PBF-Mes** in  $\text{CDCl}_3$  at 298 K.

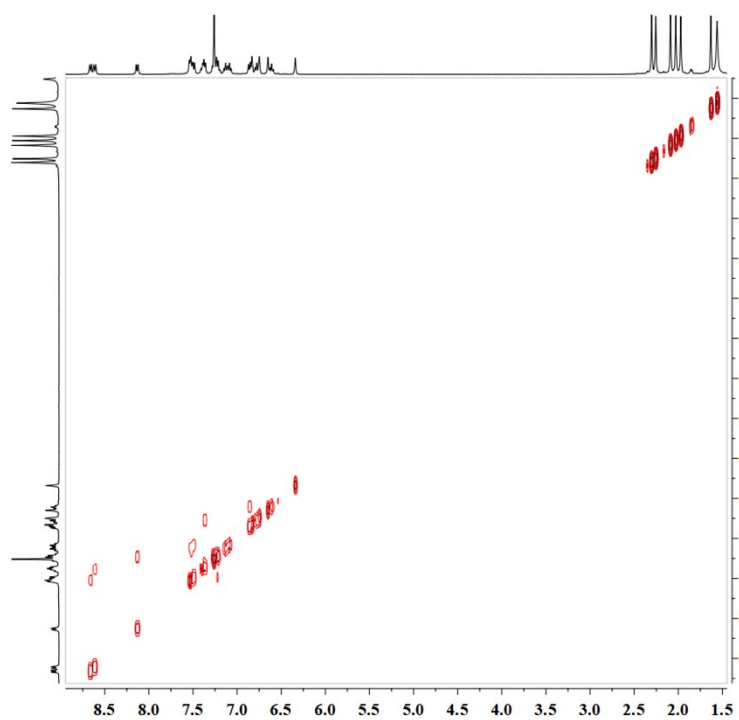

**Figure S28.** COSY spectrum (400 MHz) of compound **PBF-Mes** in  $\text{CDCl}_3$  at 298 K.



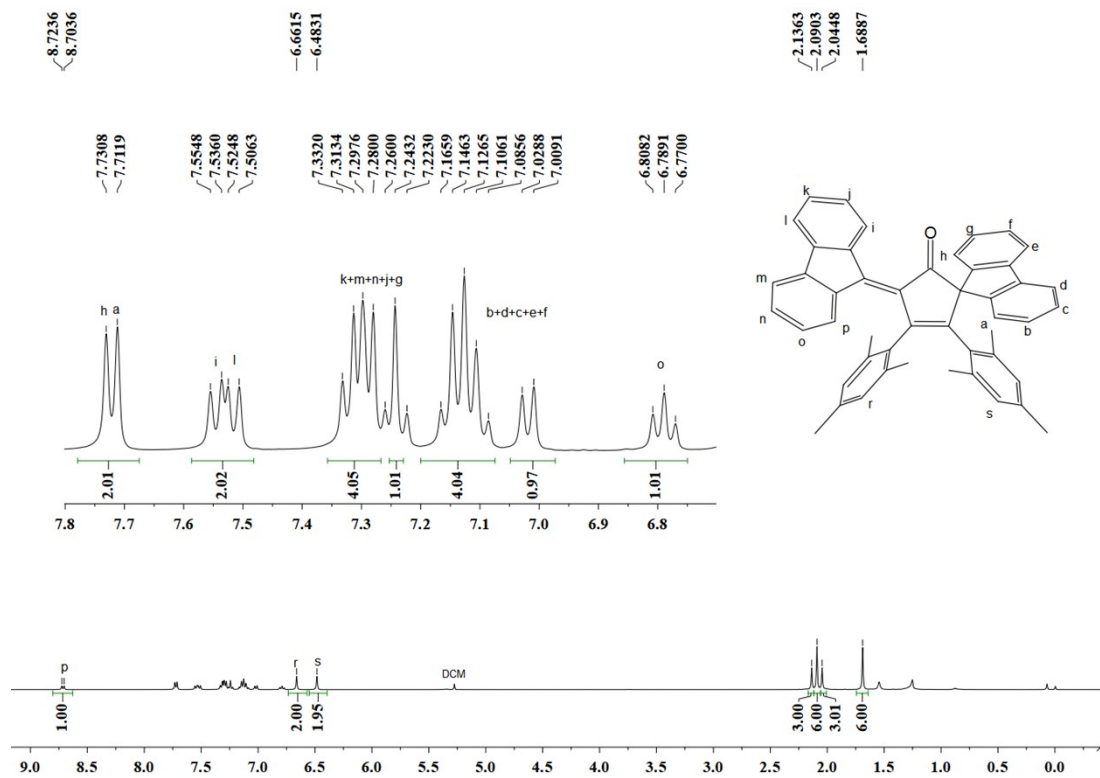

**Figure S29.** <sup>1</sup>H NMR spectrum (400 MHz) of compound **3a** in CDCl<sub>3</sub> at 298 K.

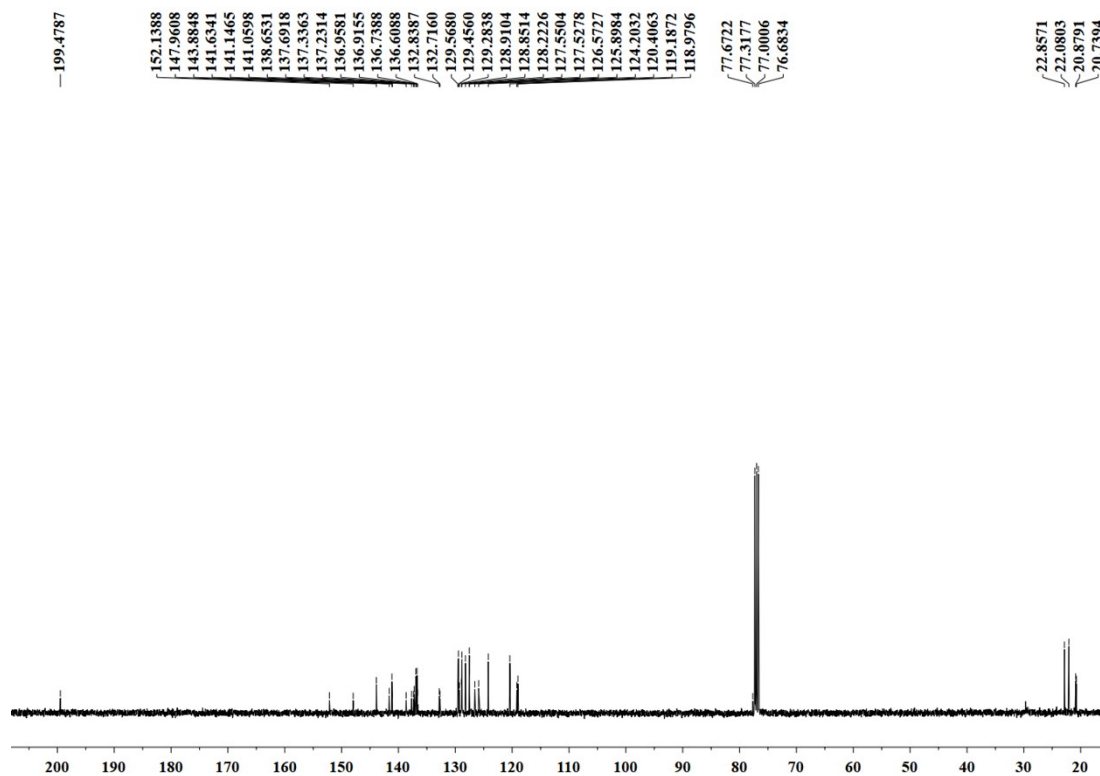

**Figure S30.** <sup>13</sup>C NMR spectrum (100 MHz) of compound **3a** in CDCl<sub>3</sub> at 298 K.

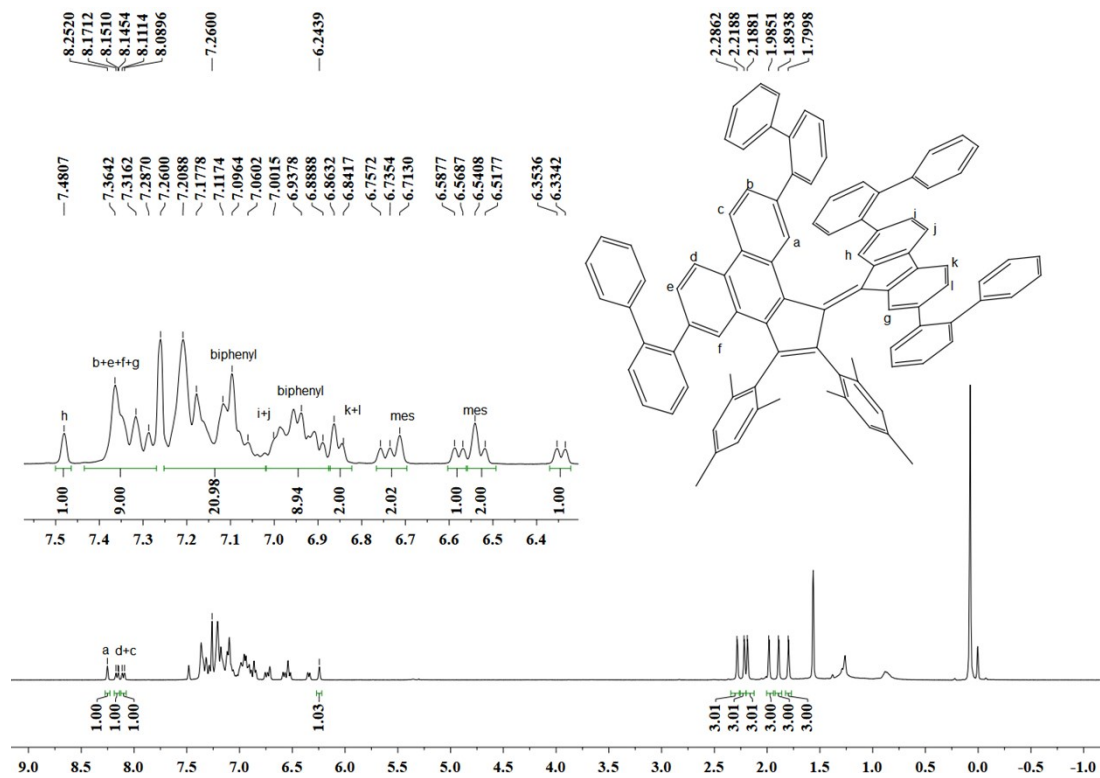

**Figure S31.**  $^1\text{H}$  NMR spectrum (400 MHz) of compound **PBF-2b** in  $\text{CDCl}_3$  at 298 K.

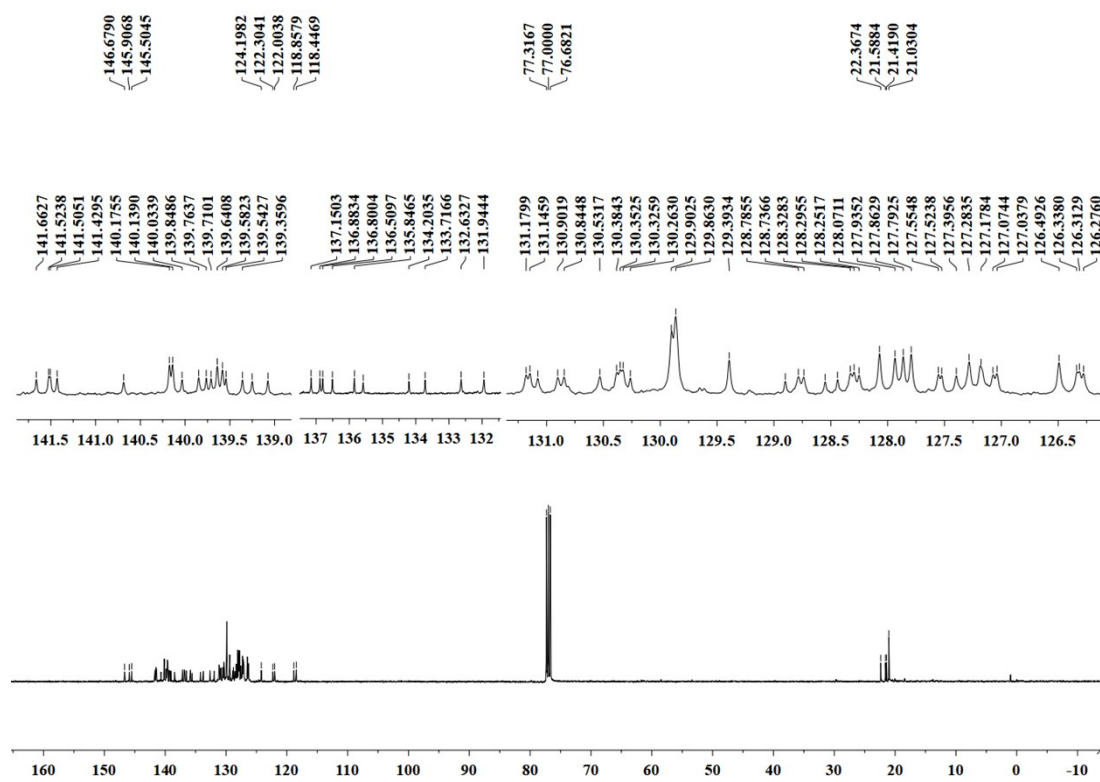

**Figure S32.**  $^{13}\text{C}$  NMR spectrum (100 MHz) of compound **PBF-2b** in  $\text{CDCl}_3$  at 298 K.

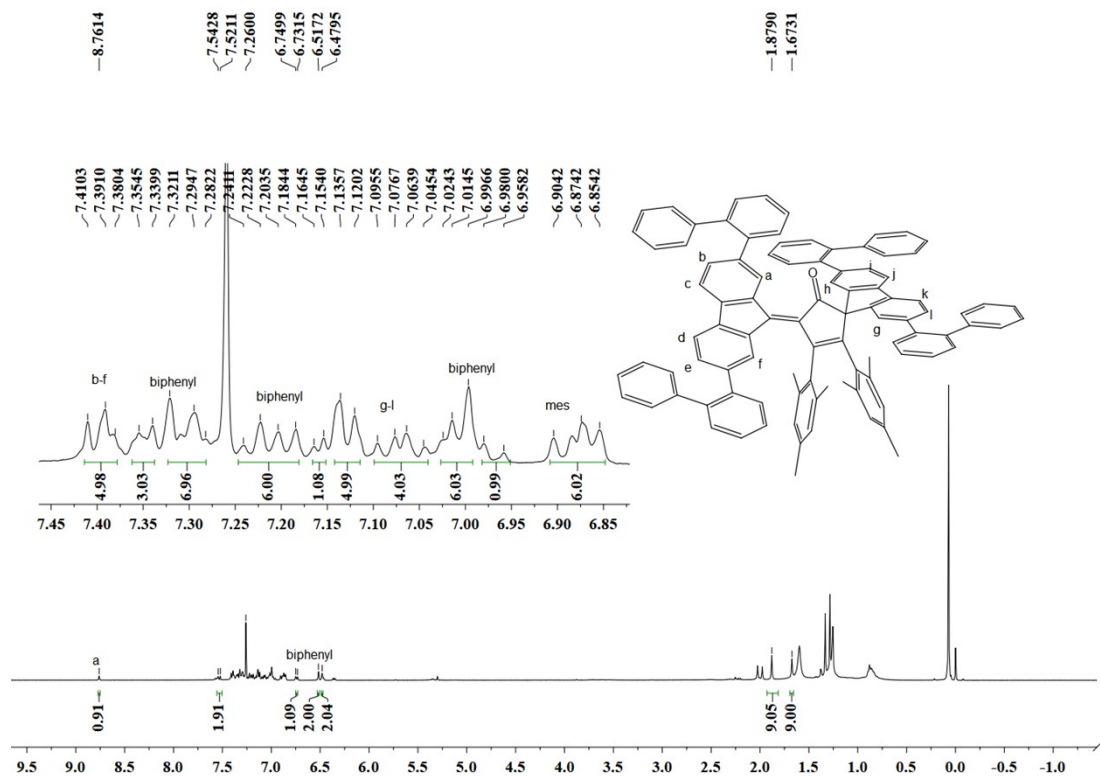

**Figure S33.**  $^1\text{H}$  NMR spectrum (400 MHz) of compound **3b** in  $\text{CDCl}_3$  at 298 K.

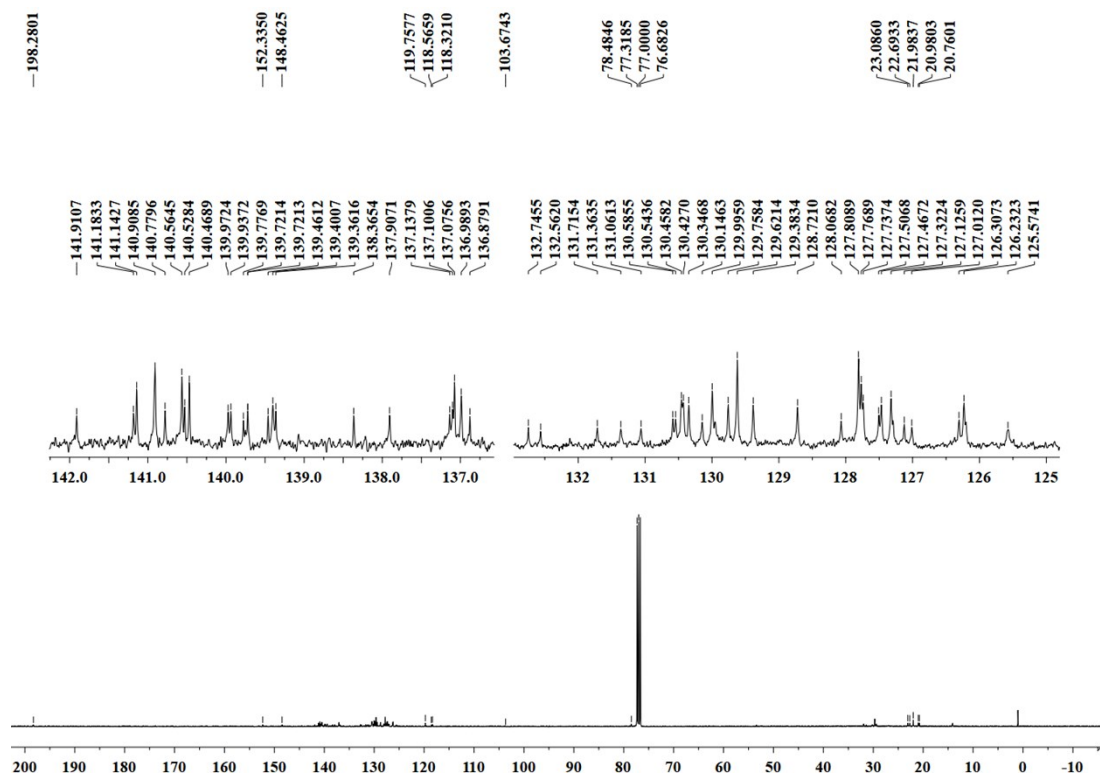

**Figure S34.**  $^{13}\text{C}$  NMR spectrum (100 MHz) of **3b** in  $\text{CDCl}_3$  at 298 K.



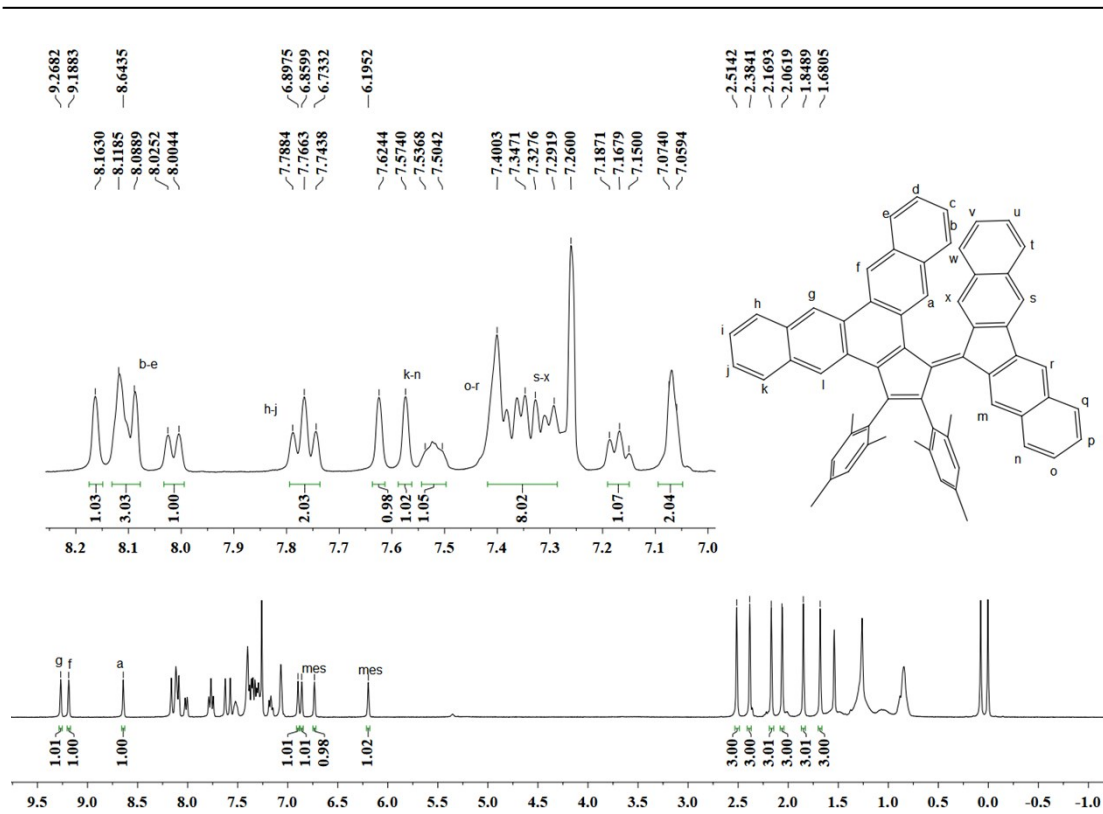

Figure S37. <sup>1</sup>H NMR spectrum (400 MHz) of compound NBF-Mes in CDCl<sub>3</sub> at 298 K.

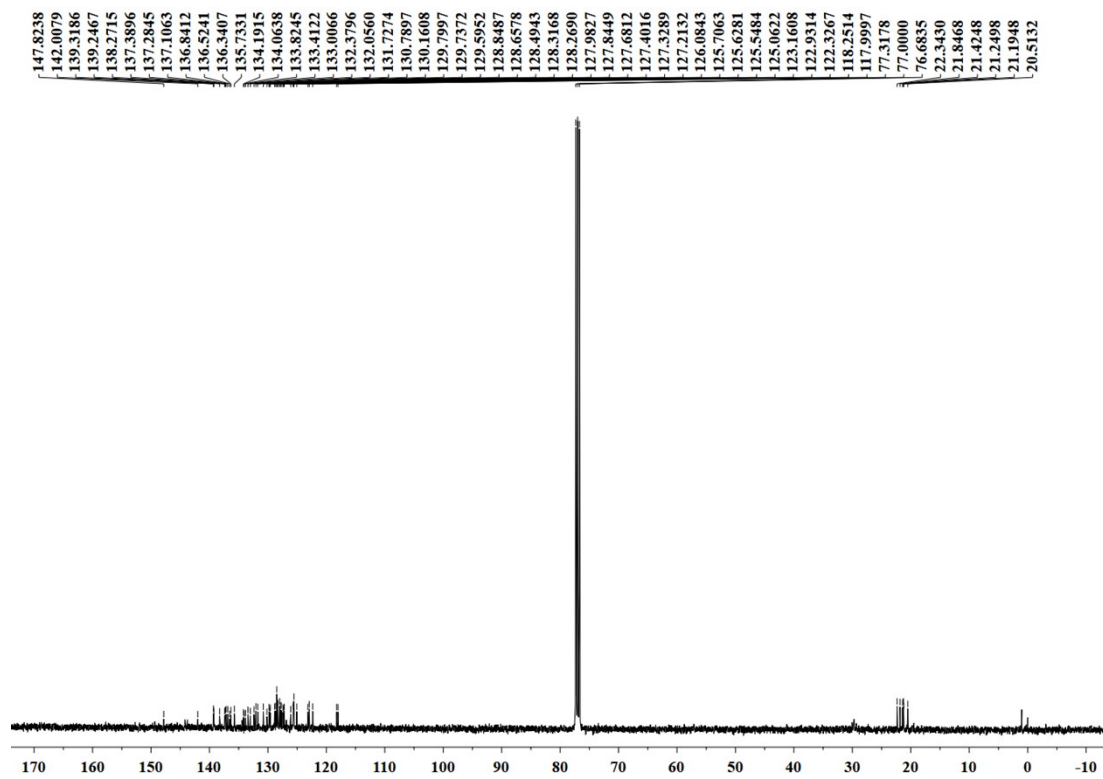

Figure S38. <sup>13</sup>C NMR spectrum (100 MHz) of compound NBF-Mes in CDCl<sub>3</sub> at 298 K.

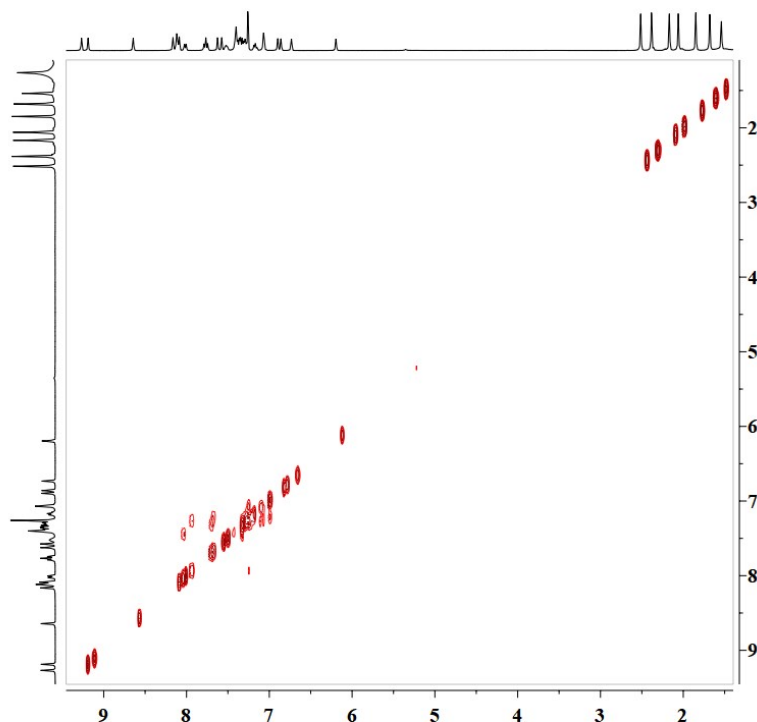

Figure S39. COSY spectrum (400 MHz) of NBF-Mes in  $\text{CDCl}_3$  at 298 K

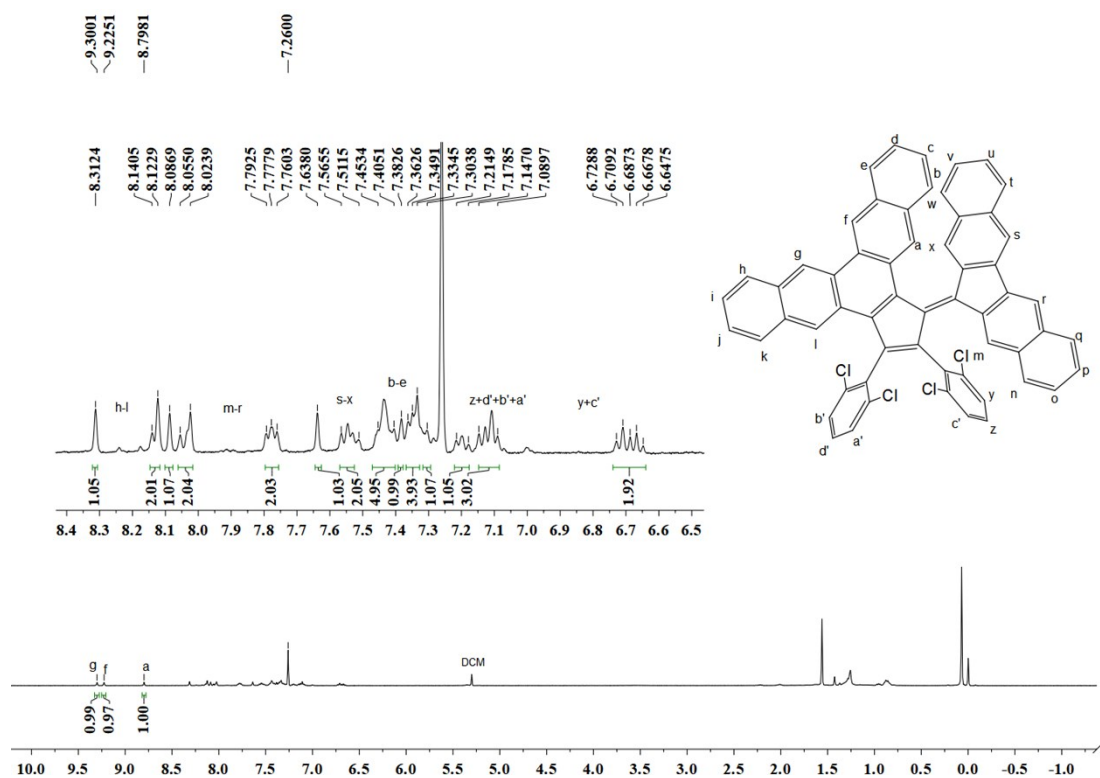

Figure S40.  $^1\text{H}$  NMR spectrum (400 MHz) of compound NBF-DCP in  $\text{CDCl}_3$  at 298 K.



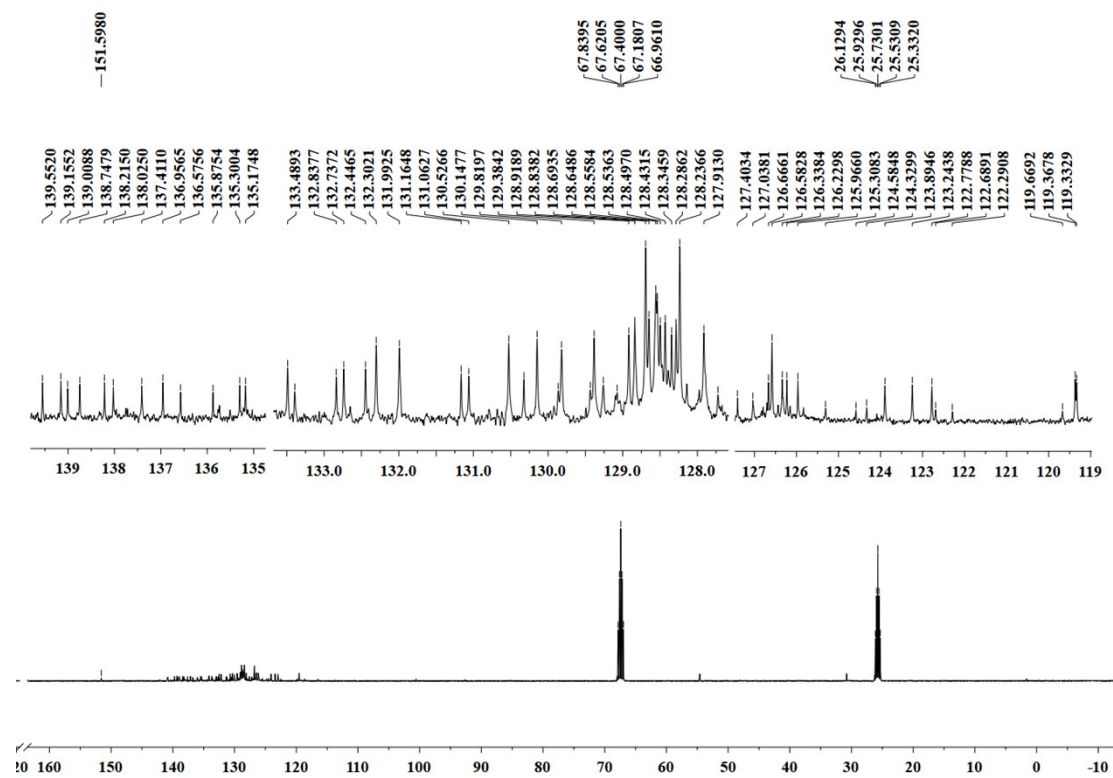

**Figure S41.**  $^{13}\text{C}$  NMR spectrum (100 MHz) of compound **NBF-DCP** in  $\text{THF-}d_8$  at 298 K

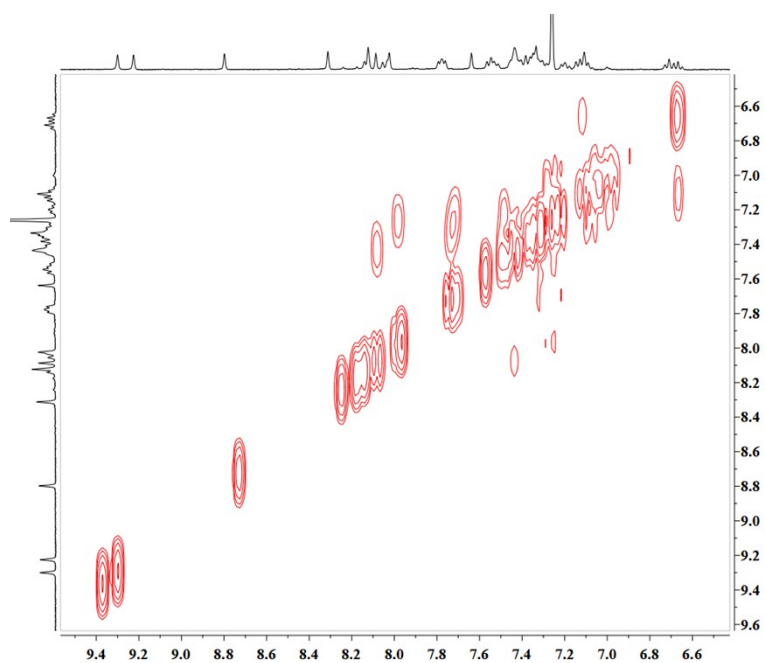

**Figure S42.** COSY spectrum (400 MHz) of compound **NBF-DCP** in  $\text{CDCl}_3$  at 298 K.

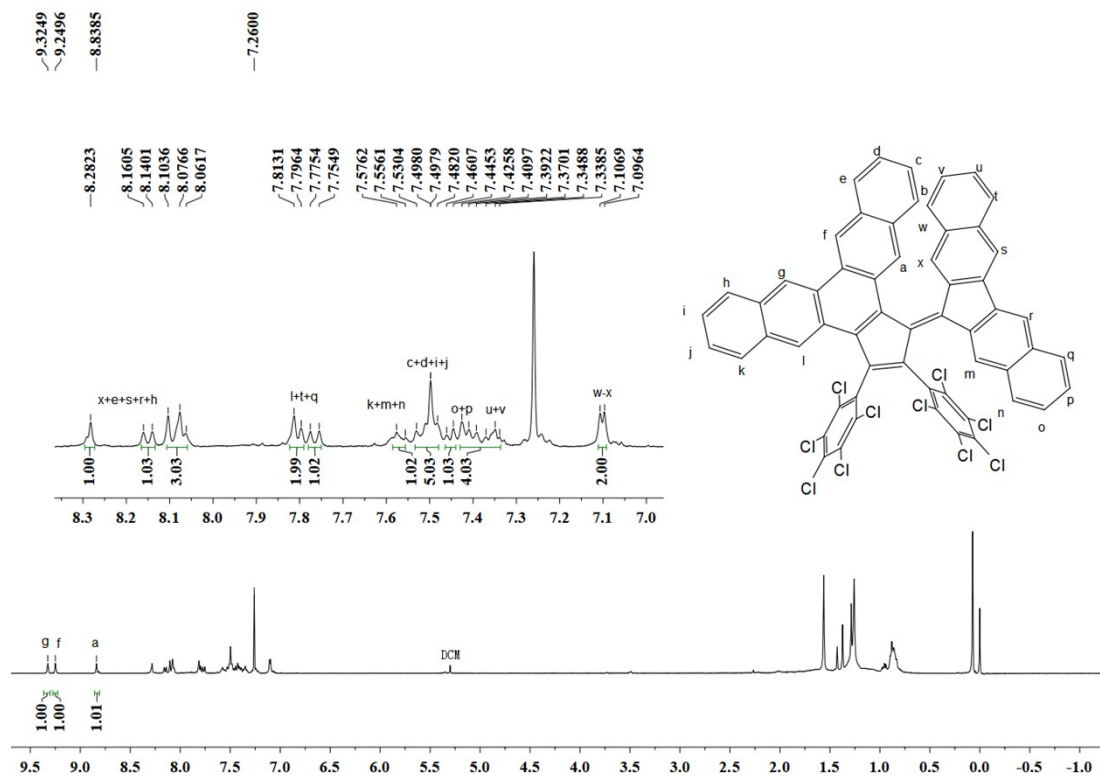

**Figure S43.**  $^1\text{H}$  NMR spectrum (400 MHz) of **NBF-PCP** in  $\text{CDCl}_3$  at 298 K.

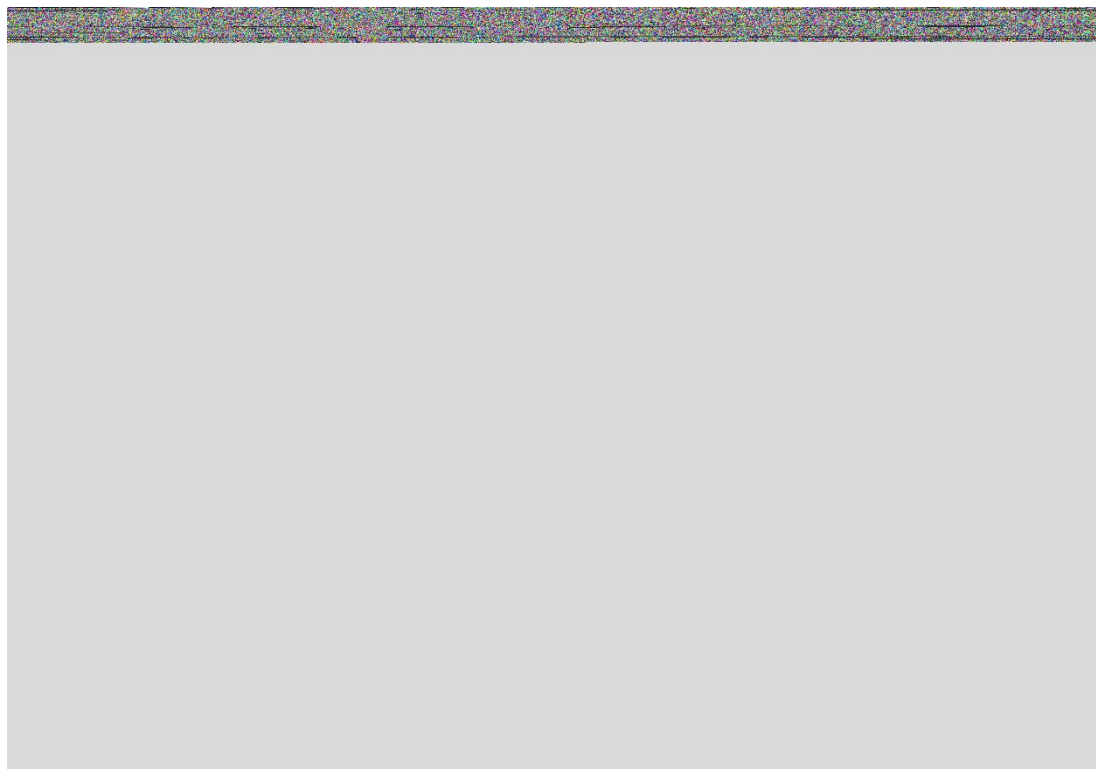

**Figure S44.**  $^{13}\text{C}$  NMR spectrum (100 MHz) of compound **NBF-PCP** in  $\text{THF-}d_8$  at 298 K



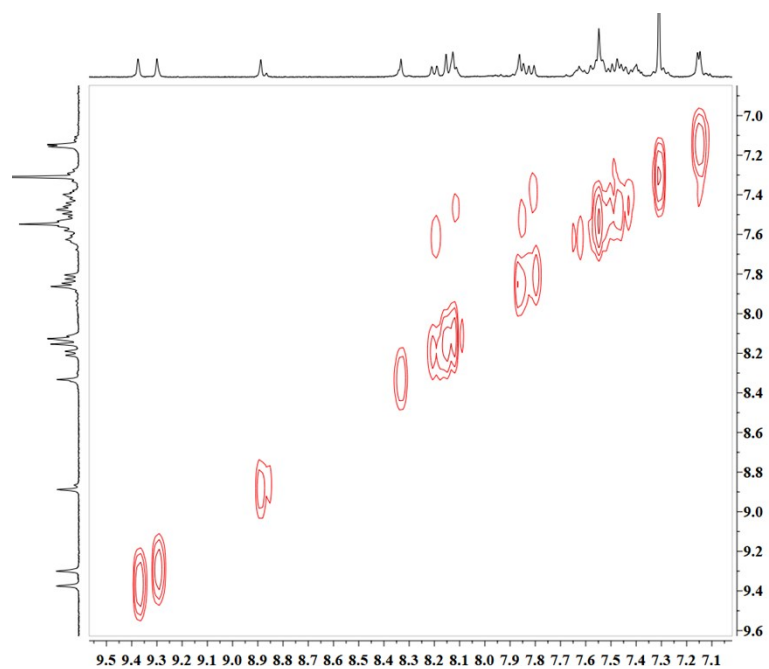

**Figure S45.** COSY spectrum (400 MHz) of compound **NBF-PCP** in  $\text{CDCl}_3$  at 298 K.

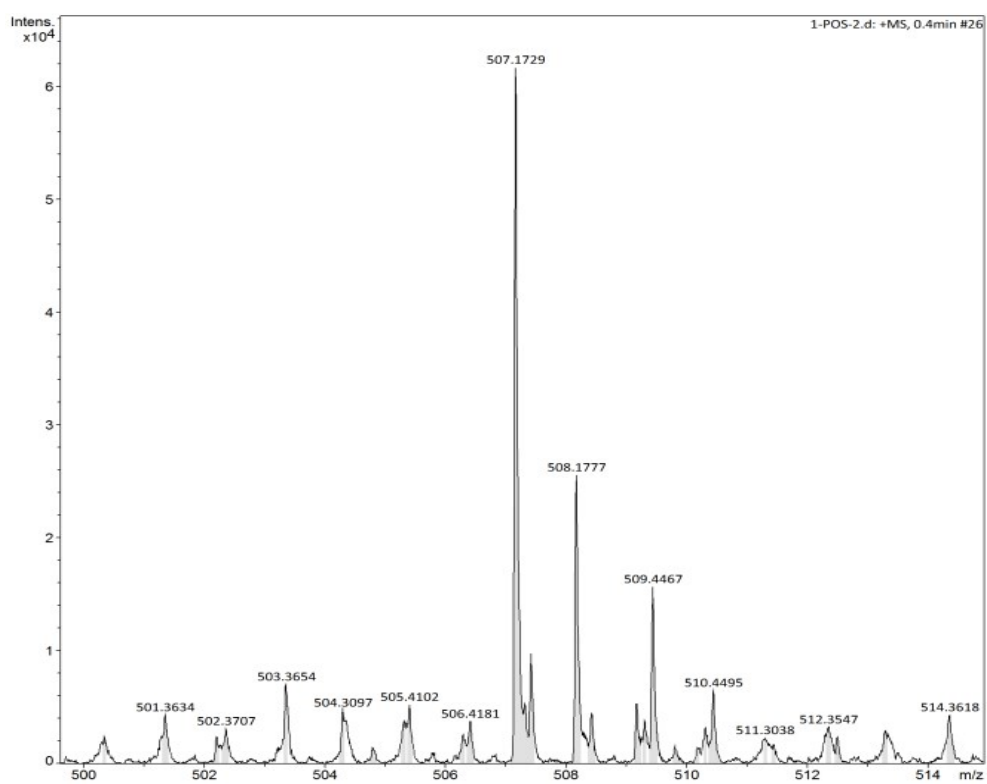

**Figure S46.** HR (APCI) mass spectrum of compound **S-3**.

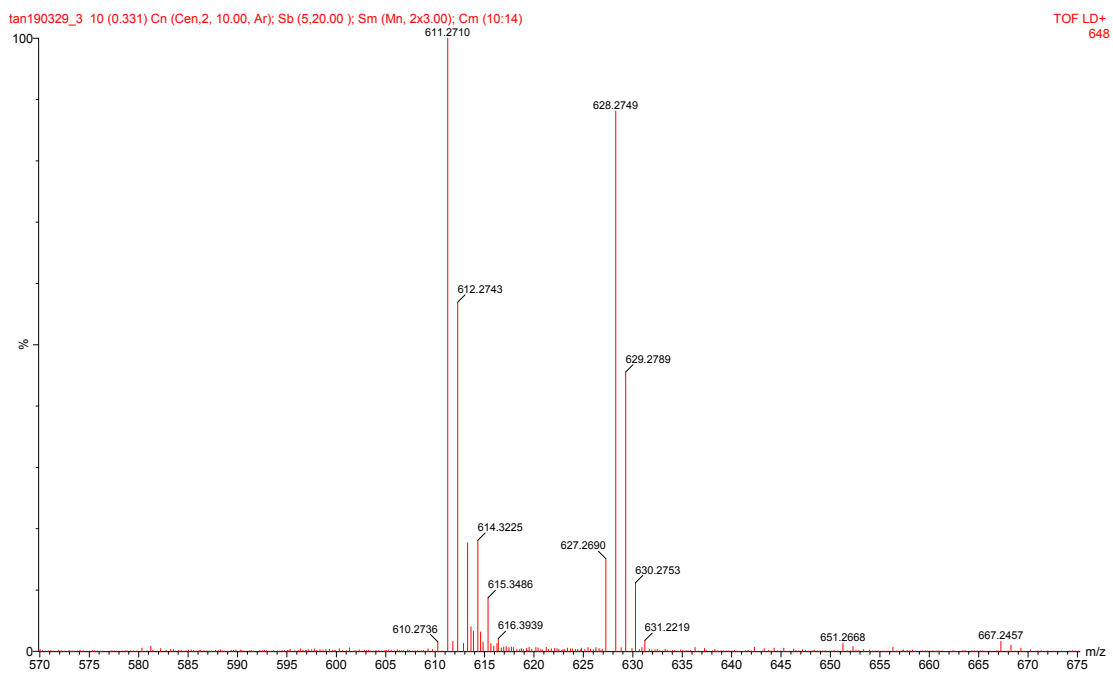

Figure S47. HR (MALDI-TOF) mass spectrum of compound **1b**.

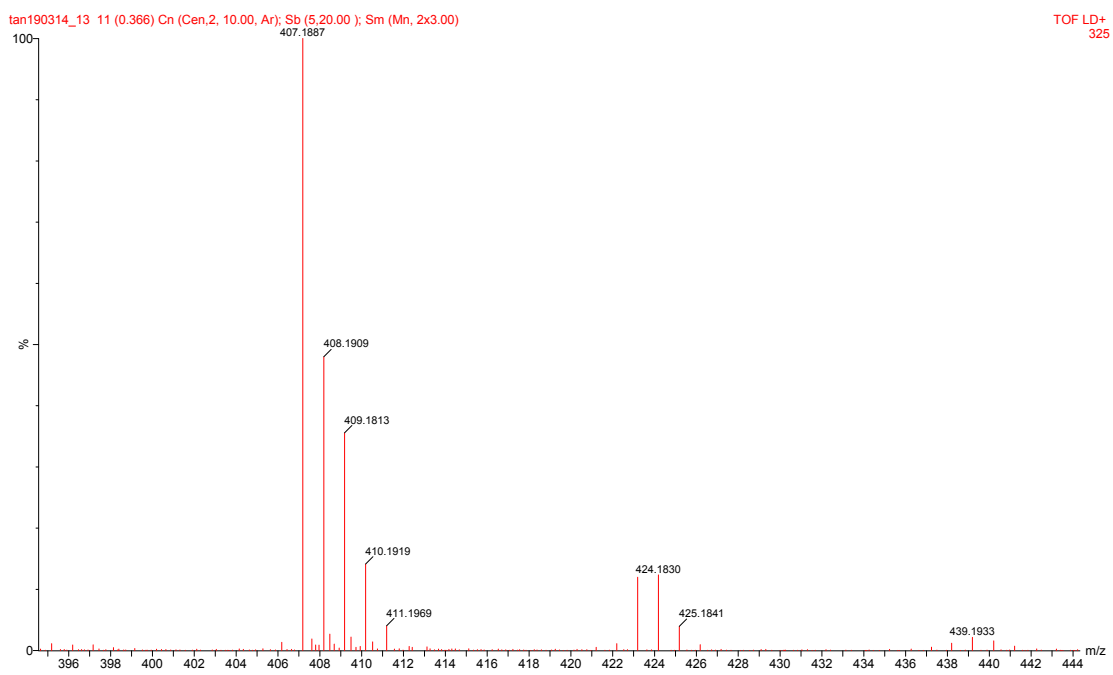

Figure S48. HR (MALDI-TOF) mass spectrum of compound **1c**.

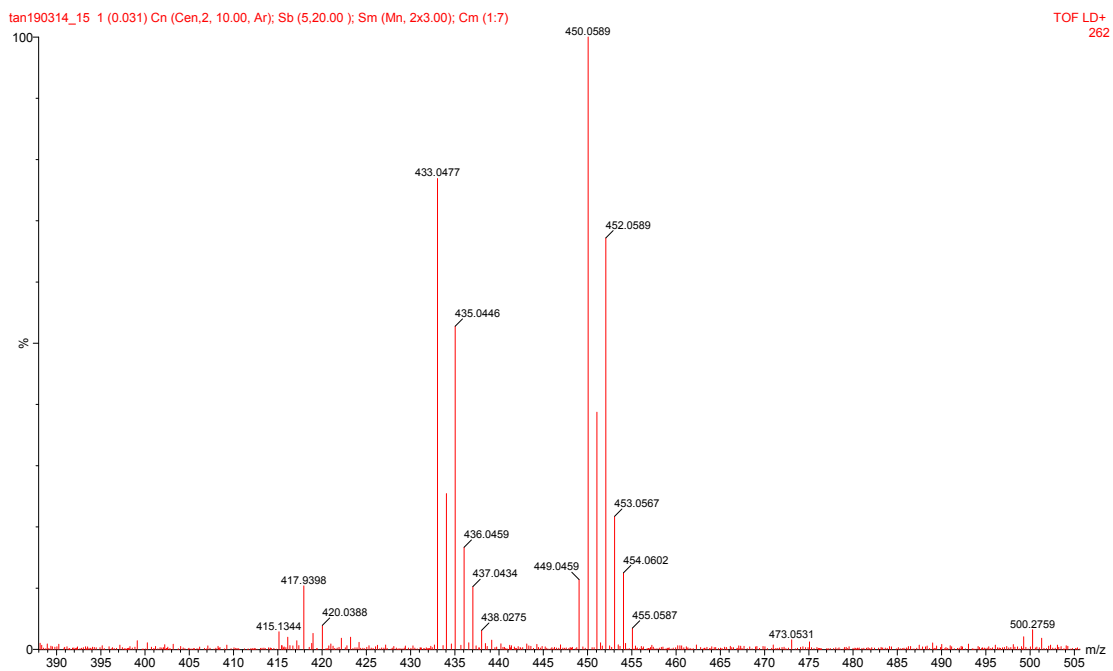

Figure S49. HR (MALDI-TOF) mass spectrum of compound 1d.

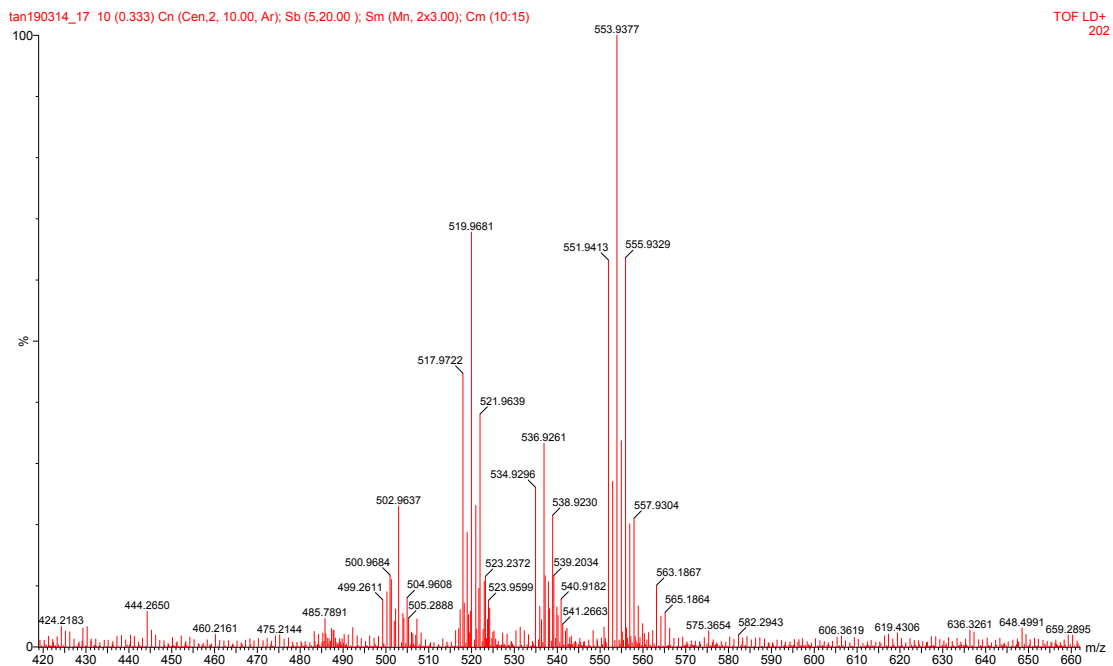

Figure S50. HR (MALDI-TOF) mass spectrum of compound 1e.

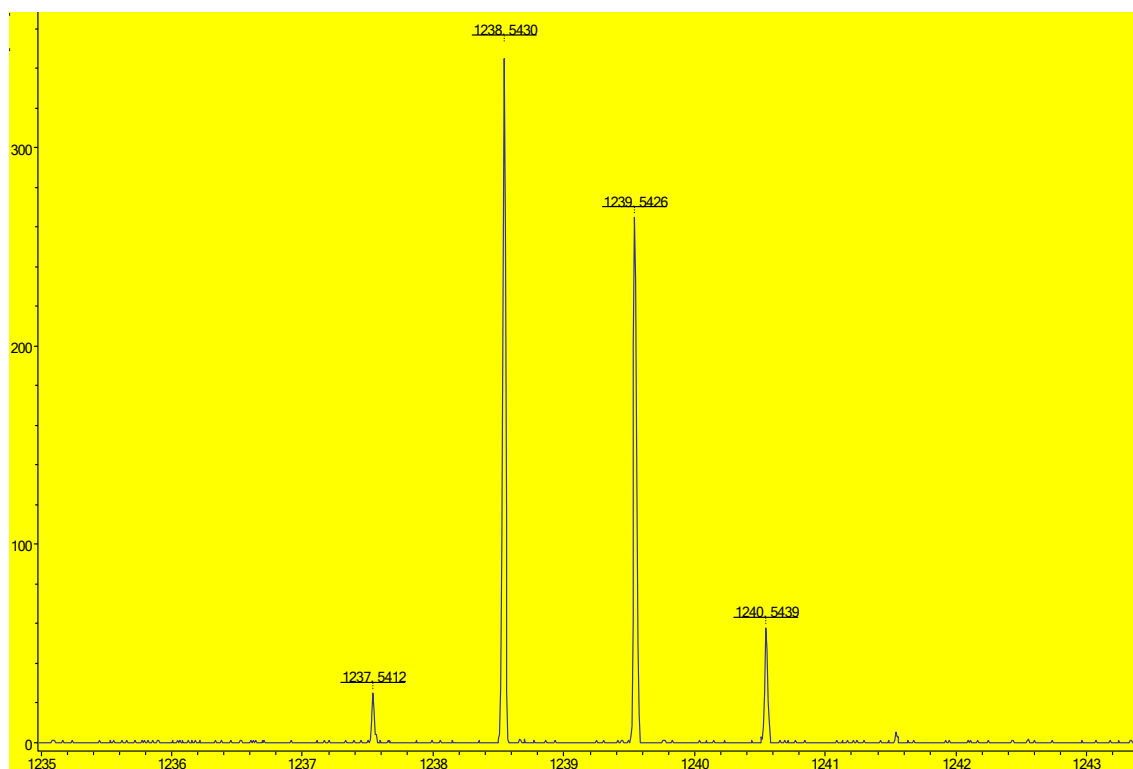

**Figure S51.** HR (MALDI-TOF) mass spectrum of compound **2b**.

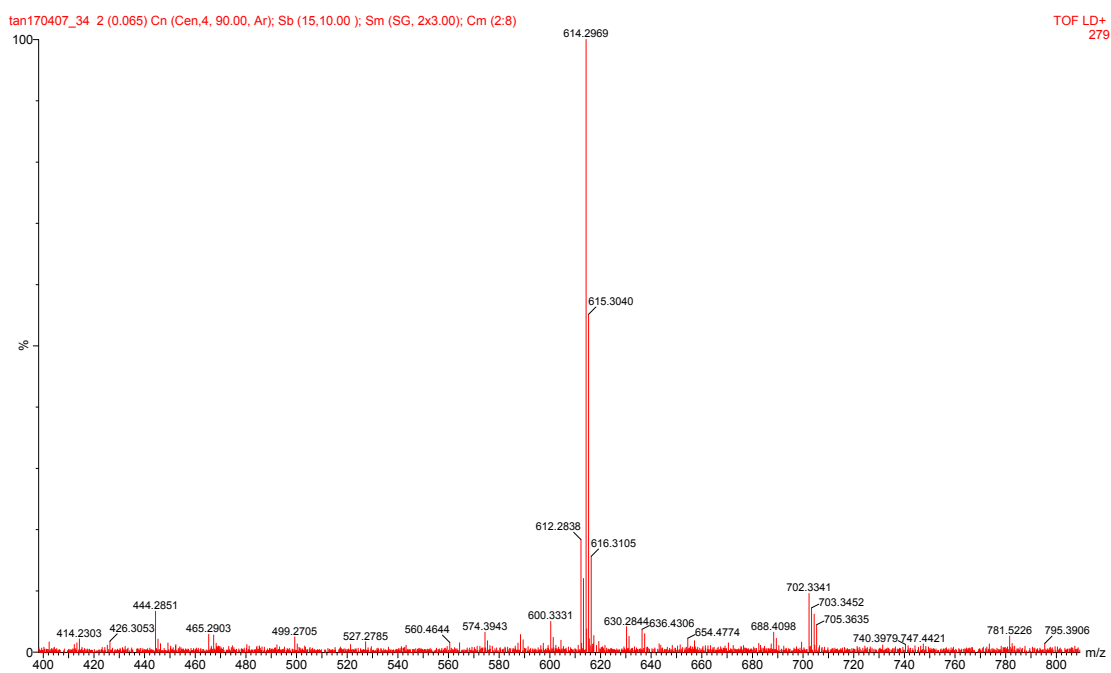

**Figure S52.** HR (MALDI-TOF) mass spectrum of compound **PBF-Mes**.

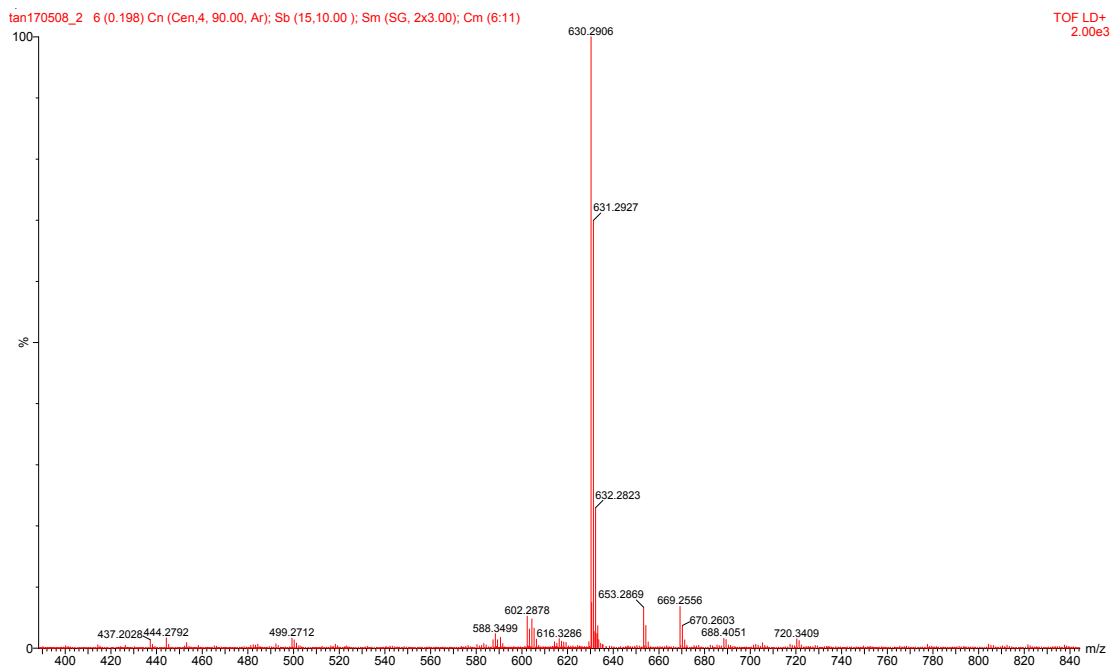

**Figure S53.** HR (MALDI-TOF) mass spectrum of compound **3a**.

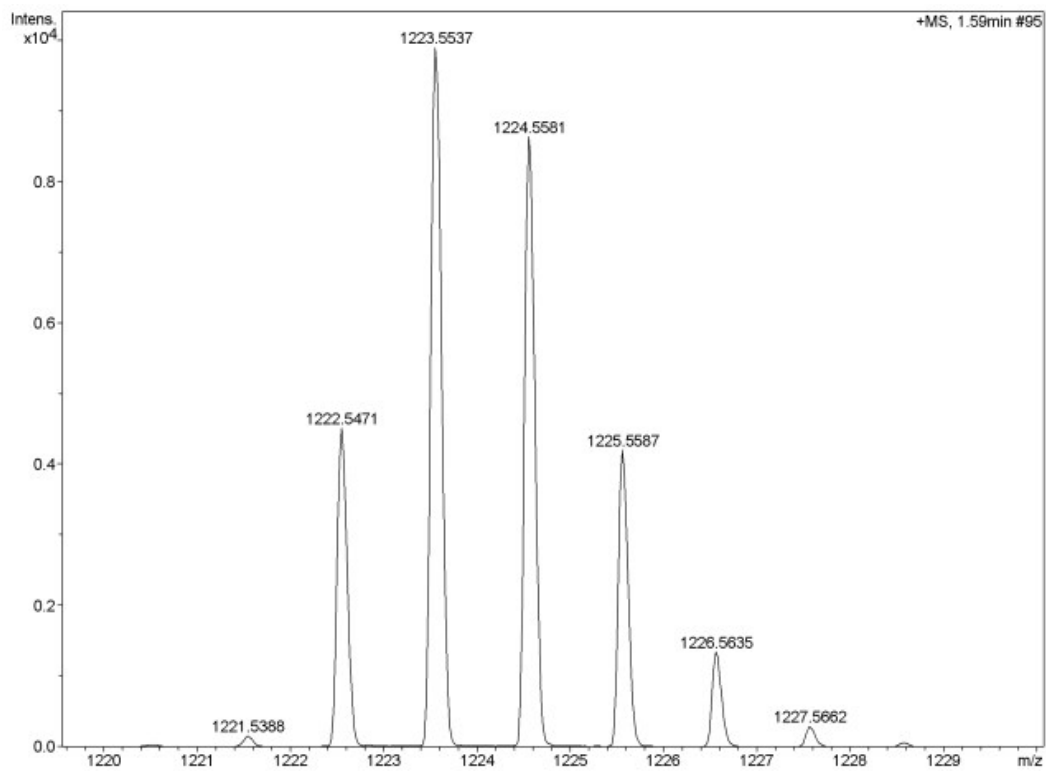

**Figure S54.** HR (ACPI) mass spectrum of compound **PBF-2b**.

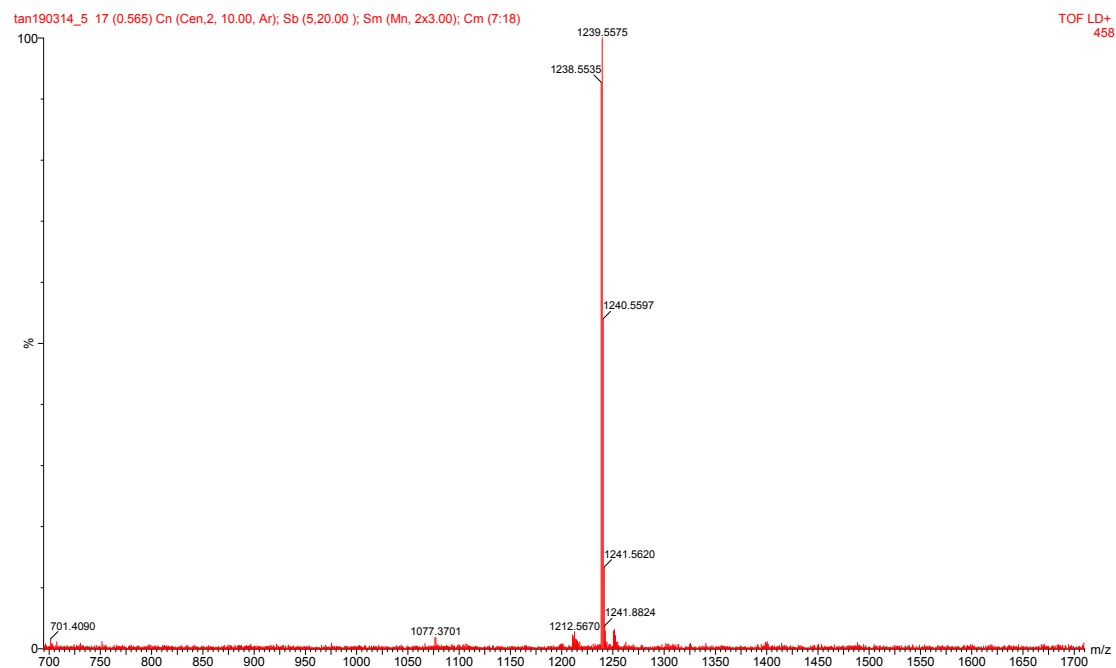

**Figure S55.** HR (MALDI-TOF) mass spectrum of compound **3b**.

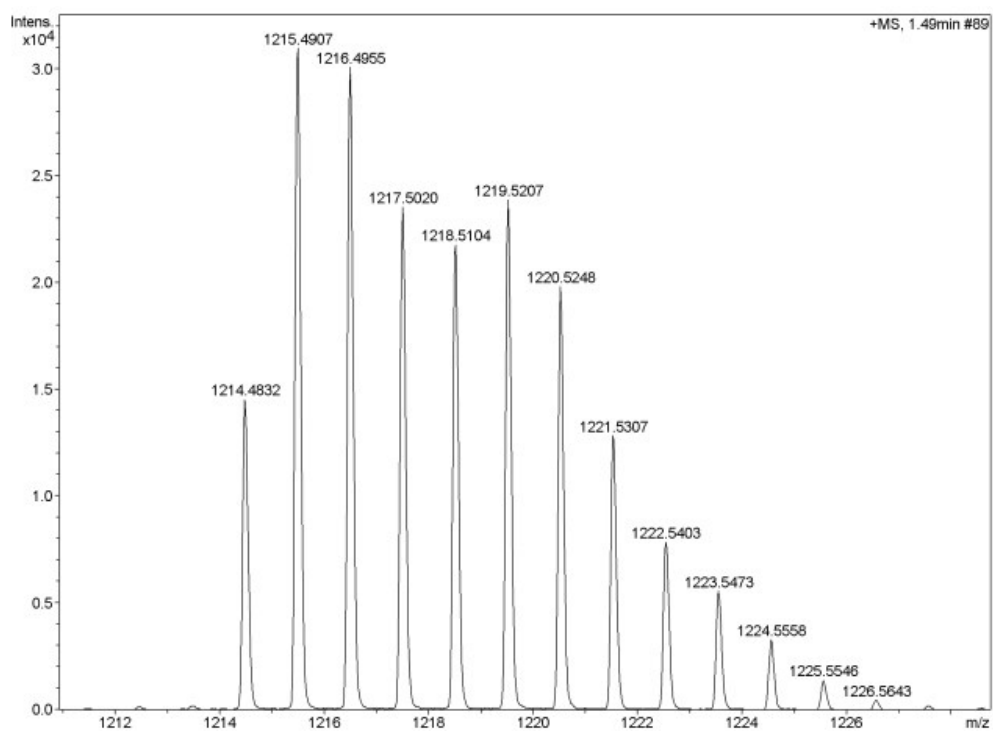

**Figure S56.** HR (APCI) mass spectrum of compound **SBF-Mes**.

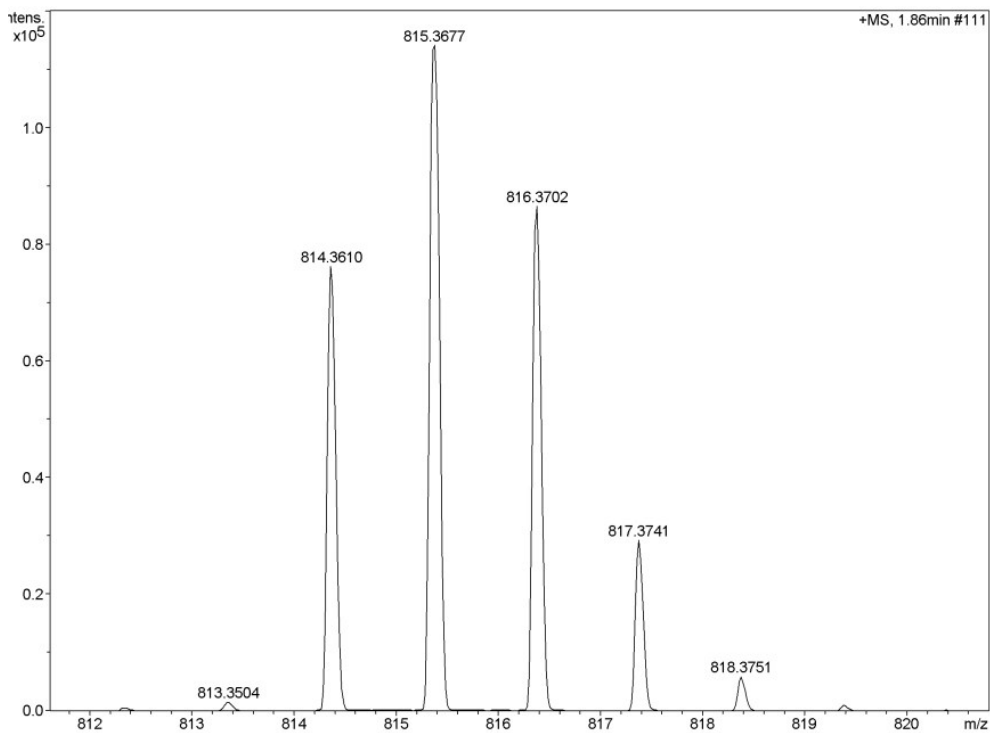

**Figure S57.** HR (APCI) mass spectrum of compound NBF-Mes.

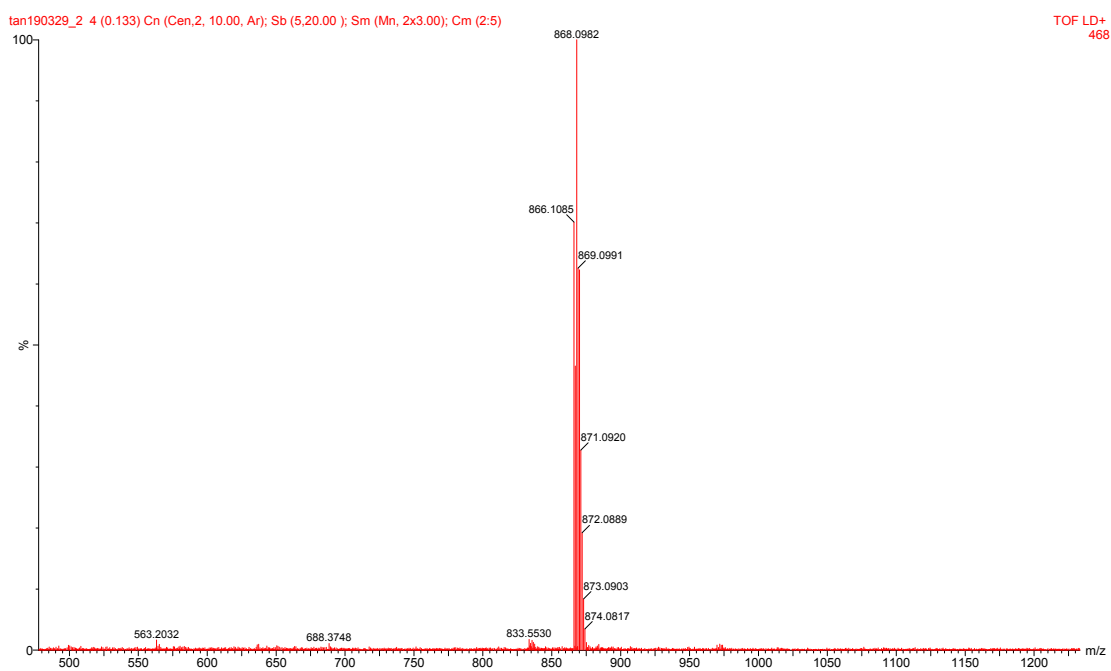

**Figure S58.** HR (MALDI-TOF) mass spectrum of compound NBF-DCP.

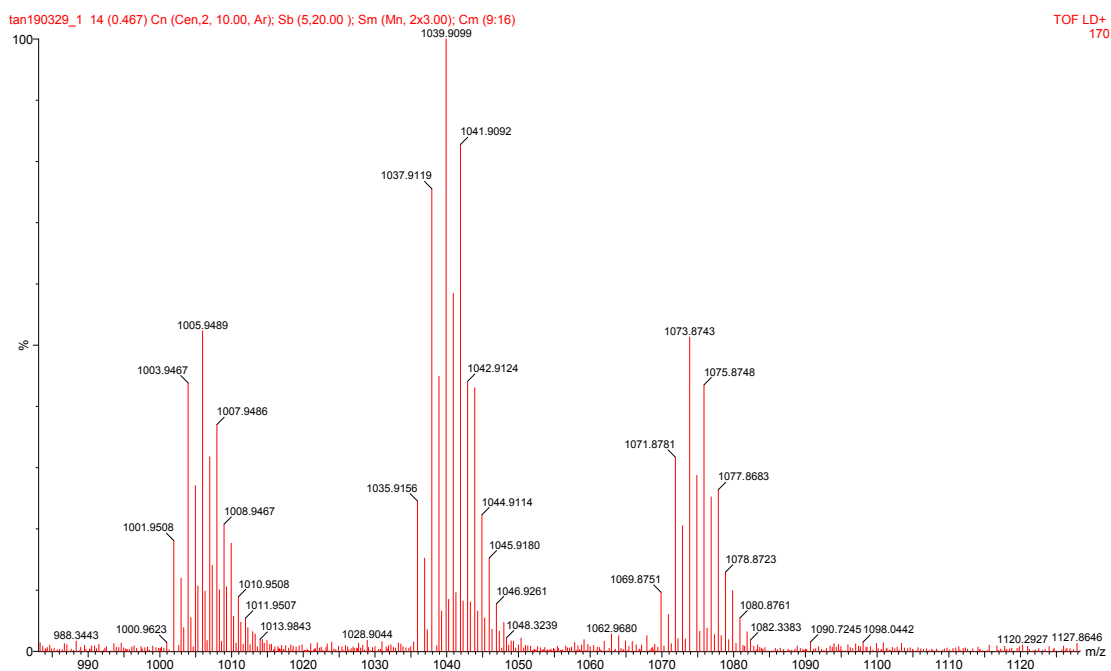

**Figure S59.** HR (MALDI-TOF) mass spectrum of compound **NBF-PCP**.

## Computational results

### Cartesian coordinates for optimized geometry A1 in the proposed radical cation mechanism (path A).

|   |             |             |             |
|---|-------------|-------------|-------------|
| C | -0.02228600 | 0.13821300  | -1.75512300 |
| C | -0.65555300 | -0.78396900 | -0.83790200 |
| C | 0.10631100  | -0.26837500 | 0.27350900  |
| C | 0.75666100  | 0.70897900  | -0.57057300 |
| C | -0.02650600 | 0.28770300  | -3.13135100 |
| C | 1.58500000  | 1.79211500  | -0.32794200 |
| C | -1.13038300 | -0.03441000 | -4.05660200 |
| C | -0.70449400 | 0.24696800  | -5.38155700 |
| C | 0.68900900  | 0.70656700  | -5.32818100 |



---

|   |             |             |             |
|---|-------------|-------------|-------------|
| C | 1.08761300  | 0.75961900  | -3.96477000 |
| C | 2.56253100  | 1.93283300  | 0.76834900  |
| C | 3.17132100  | 3.21163400  | 0.66809300  |
| C | 2.56126800  | 3.92292400  | -0.46248200 |
| C | 1.62531900  | 3.05127200  | -1.08312300 |
| C | 3.02150700  | 1.01707600  | 1.72026000  |
| C | 4.04138900  | 1.40208200  | 2.59566000  |
| C | 4.61414800  | 2.67348300  | 2.51054900  |
| C | 4.18822500  | 3.58631200  | 1.53537000  |
| C | 2.73453600  | 5.22024300  | -0.92115000 |
| C | 1.95879500  | 5.66500300  | -2.00323500 |
| C | 1.01122200  | 4.82746800  | -2.59597000 |
| C | 0.83178700  | 3.51922900  | -2.13833600 |
| C | -2.45435900 | -0.41598400 | -3.81863800 |
| C | -3.32336800 | -0.56492300 | -4.90364300 |
| C | -2.88808500 | -0.31553900 | -6.20749300 |
| C | -1.57341900 | 0.10369800  | -6.45467200 |
| C | 1.58358700  | 1.01750800  | -6.34147200 |
| C | 2.89743000  | 1.37306500  | -5.99897100 |
| C | 3.30823200  | 1.39222900  | -4.66414000 |
| C | 2.41148400  | 1.08030500  | -3.63861500 |
| C | -1.60604800 | -1.88993100 | -0.95362000 |
| C | -1.31829000 | -2.99255500 | -1.80581100 |

---

|   |             |             |             |
|---|-------------|-------------|-------------|
| C | -2.22986400 | -4.04628500 | -1.86235800 |
| C | -3.42917100 | -4.04117700 | -1.14067100 |
| C | -3.69572300 | -2.94046100 | -0.32084500 |
| C | -2.80762600 | -1.87129900 | -0.19578800 |
| C | -3.18863500 | -0.71118600 | 0.69653300  |
| C | -0.04625400 | -3.09556300 | -2.61645800 |
| C | -4.41030500 | -5.17863300 | -1.26315600 |
| C | 0.09620300  | -0.57769300 | 1.70355100  |
| C | -0.26751000 | 0.42036700  | 2.64841000  |
| C | -0.29988600 | 0.07797000  | 4.00071700  |
| C | 0.03988500  | -1.19861500 | 4.46007500  |
| C | 0.41440300  | -2.15797700 | 3.51279900  |
| C | 0.43390000  | -1.88612600 | 2.14515800  |
| C | 0.87535600  | -2.97342100 | 1.19135100  |
| C | -0.65975800 | 1.82593500  | 2.25326200  |
| C | -0.02077100 | -1.53835000 | 5.92708100  |
| H | 2.60190200  | 0.02136200  | 1.79064100  |
| H | 4.39570500  | 0.70072400  | 3.34395400  |
| H | 5.40812000  | 2.95301300  | 3.19585300  |
| H | 4.65828100  | 4.56179200  | 1.45729100  |
| H | 3.44429800  | 5.89090500  | -0.44680800 |
| H | 2.08686200  | 6.67778400  | -2.37222000 |
| H | 0.40624400  | 5.19446300  | -3.41839100 |

---

|   |             |             |             |
|---|-------------|-------------|-------------|
| H | 0.08038400  | 2.88921900  | -2.59628600 |
| H | -2.81492900 | -0.59782800 | -2.81407400 |
| H | -4.34951900 | -0.87063100 | -4.72763300 |
| H | -3.57827700 | -0.43233800 | -7.03705700 |
| H | -1.25110500 | 0.32278200  | -7.46794900 |
| H | 1.28464500  | 0.97372900  | -7.38416800 |
| H | 3.60617700  | 1.62011200  | -6.78314200 |
| H | 4.33322800  | 1.64974200  | -4.41884100 |
| H | 2.75055000  | 1.08162500  | -2.61075400 |
| H | -1.99338400 | -4.90281100 | -2.48862100 |
| H | -4.62615900 | -2.91136700 | 0.24007700  |
| H | -2.67725800 | -0.76128700 | 1.66282600  |
| H | -2.94482000 | 0.25563300  | 0.24581400  |
| H | -4.26305300 | -0.72076100 | 0.89397200  |
| H | 0.81455700  | -2.65471900 | -2.10786600 |
| H | 0.18738300  | -4.14293600 | -2.82167800 |
| H | -0.14952300 | -2.58975200 | -3.58231000 |
| H | -3.89740100 | -6.14287500 | -1.32381800 |
| H | -5.09934400 | -5.20816900 | -0.41552100 |
| H | -5.01241200 | -5.07595500 | -2.17418800 |
| H | -0.60289200 | 0.83510500  | 4.71948500  |
| H | 0.70371900  | -3.14999800 | 3.84973300  |
| H | 1.37339600  | -3.77847900 | 1.73628600  |

---

|   |             |             |            |
|---|-------------|-------------|------------|
| H | 0.02534200  | -3.41290600 | 0.66061900 |
| H | 1.57710400  | -2.60186200 | 0.43786400 |
| H | 0.21783700  | 2.47808700  | 2.18923300 |
| H | -1.16768500 | 1.86701500  | 1.28687500 |
| H | -1.32982800 | 2.25595700  | 3.00157900 |
| H | 0.16340000  | -0.65960400 | 6.55084200 |
| H | -1.01183000 | -1.92556800 | 6.19391800 |
| H | 0.70965900  | -2.30792900 | 6.19078200 |

**Cartesian coordinates for optimized structural geometry relative to transition state TS1 in the proposed radical cation mechanism (Path A).**

|   |             |             |             |
|---|-------------|-------------|-------------|
| C | 1.57933900  | 0.42393600  | -1.39684500 |
| C | 0.46730700  | -0.01771100 | -2.10762400 |
| C | -0.35676800 | -0.49829200 | -0.95592500 |
| C | 0.18193900  | 0.00440300  | 0.19022900  |
| C | 1.58780800  | 1.35154400  | -0.36787800 |
| C | 0.98292000  | 2.73078300  | -0.51037800 |
| C | 1.67029600  | 3.60391200  | 0.35961300  |
| C | 2.71438900  | 2.84911900  | 1.07105800  |
| C | 2.68257600  | 1.50850400  | 0.63259300  |
| C | -0.03431500 | 3.19142300  | -1.33688500 |
| C | -0.38770200 | 4.54452800  | -1.27058700 |
| C | 0.28017800  | 5.41239400  | -0.40128700 |
| C | 1.31707300  | 4.95022300  | 0.41608400  |

---

|   |             |             |             |
|---|-------------|-------------|-------------|
| C | 3.66313700  | 3.25828000  | 2.00451400  |
| C | 4.57760100  | 2.31717400  | 2.48993900  |
| C | 4.55146600  | 0.99183800  | 2.04377100  |
| C | 3.60038200  | 0.57688600  | 1.10557300  |
| C | 0.33128400  | -0.02918400 | -3.49958000 |
| C | 1.45279500  | 0.20673900  | -4.41705600 |
| C | 0.96339400  | 0.17517300  | -5.74830400 |
| C | -0.48458100 | -0.06462700 | -5.69265700 |
| C | -0.86803500 | -0.19248900 | -4.32614600 |
| C | -1.42717700 | -0.14559400 | -6.70616700 |
| C | -2.77362400 | -0.34500700 | -6.36543700 |
| C | -3.16257100 | -0.44758100 | -5.02776600 |
| C | -2.21882600 | -0.36537800 | -3.99947300 |
| C | 2.81533600  | 0.40216300  | -4.17328700 |
| C | 3.67629200  | 0.59722100  | -5.25786200 |
| C | 3.18545700  | 0.57748000  | -6.56637500 |
| C | 1.82242000  | 0.36112900  | -6.82149000 |
| C | -1.44776000 | -1.51276000 | -0.99363700 |
| C | -1.22287500 | -2.77339600 | -1.60980600 |
| C | -2.25613800 | -3.71286100 | -1.61199500 |
| C | -3.50932500 | -3.45399900 | -1.04931900 |
| C | -3.71446900 | -2.19875100 | -0.47415200 |
| C | -2.71381900 | -1.22348100 | -0.42568000 |

---

|   |             |             |             |
|---|-------------|-------------|-------------|
| C | -3.05177400 | 0.10708300  | 0.20746100  |
| C | 0.07342100  | -3.15592900 | -2.29434500 |
| C | -4.59486400 | -4.50162000 | -1.05275900 |
| C | 0.22746900  | -0.29894200 | 1.59103500  |
| C | 0.77722200  | -1.55239600 | 2.02114400  |
| C | 0.81581200  | -1.83993200 | 3.37925200  |
| C | 0.32929800  | -0.94818800 | 4.34656500  |
| C | -0.19603300 | 0.27197100  | 3.91392700  |
| C | -0.24298600 | 0.63085000  | 2.56750500  |
| C | -0.81756100 | 1.98403700  | 2.22485300  |
| C | 1.30066100  | -2.57672900 | 1.04787100  |
| C | 0.36022400  | -1.31071300 | 5.80795600  |
| H | -0.54863600 | 2.52736500  | -2.02522400 |
| H | -1.18183900 | 4.92284200  | -1.90694900 |
| H | -0.00262900 | 6.46033700  | -0.36694900 |
| H | 1.84034800  | 5.63545000  | 1.07697600  |
| H | 3.70537200  | 4.28887200  | 2.34506700  |
| H | 5.32433900  | 2.62292900  | 3.21693000  |
| H | 5.27798200  | 0.28045100  | 2.42455800  |
| H | 3.59066400  | -0.44947900 | 0.75103400  |
| H | -1.13619400 | -0.04919500 | -7.74821800 |
| H | -3.52098700 | -0.40920600 | -7.15082200 |
| H | -4.20991100 | -0.58932400 | -4.77952500 |

---

|   |             |             |             |
|---|-------------|-------------|-------------|
| H | -2.54452300 | -0.44058300 | -2.97025200 |
| H | 3.21199700  | 0.39011800  | -3.16111300 |
| H | 4.73553500  | 0.75559600  | -5.08090700 |
| H | 3.86823500  | 0.72390000  | -7.39811900 |
| H | 1.45551100  | 0.34066100  | -7.84368500 |
| H | -2.07460100 | -4.67938400 | -2.07689100 |
| H | -4.68722000 | -1.96399900 | -0.04816200 |
| H | -4.13283900 | 0.27259200  | 0.18687500  |
| H | -2.73889800 | 0.14213000  | 1.25704000  |
| H | -2.57433000 | 0.94818000  | -0.30413700 |
| H | 0.95736200  | -2.71584800 | -1.82814100 |
| H | 0.19931900  | -4.24262700 | -2.28218200 |
| H | 0.06975900  | -2.84470600 | -3.34597400 |
| H | -4.45641800 | -5.21042600 | -0.22595300 |
| H | -5.58614300 | -4.05325000 | -0.93635200 |
| H | -4.58845800 | -5.08306900 | -1.98058200 |
| H | 1.23688300  | -2.78944700 | 3.70081000  |
| H | -0.57825500 | 0.97339700  | 4.65183800  |
| H | -1.73966800 | 2.15782700  | 2.79006100  |
| H | -0.11773500 | 2.77943900  | 2.50406700  |
| H | -1.03925300 | 2.09999800  | 1.16481400  |
| H | 1.92724800  | -2.13162700 | 0.26794900  |
| H | 1.89528600  | -3.33231500 | 1.56813700  |

---

|   |             |             |            |
|---|-------------|-------------|------------|
| H | 0.47498500  | -3.09375700 | 0.54597300 |
| H | -0.42799200 | -2.03838000 | 6.04168800 |
| H | 1.31426300  | -1.77304900 | 6.08326100 |
| H | 0.20335000  | -0.43604300 | 6.44521400 |

**Cartesian coordinates for optimized geometry A2 in the proposed cation mechanism (Path A).**

|   |             |             |             |
|---|-------------|-------------|-------------|
| C | -0.94207200 | 0.48404900  | 1.46620800  |
| C | -0.96654400 | -0.86071100 | 1.15410700  |
| C | -0.82705100 | -0.92846800 | -0.34061900 |
| C | -0.55556900 | 0.33662700  | -0.81989000 |
| C | -0.41396800 | 1.32386400  | 0.37527000  |
| C | 0.99450600  | 1.62413700  | 0.95870200  |
| C | 1.11317600  | 3.00928800  | 1.19998400  |
| C | -0.11293800 | 3.68103100  | 0.76862400  |
| C | -1.01534600 | 2.71988500  | 0.26835900  |
| C | 2.01894600  | 0.74100500  | 1.28561900  |
| C | 3.19859000  | 1.25945800  | 1.82449200  |
| C | 3.33152400  | 2.63484200  | 2.05281900  |
| C | 2.29353100  | 3.51674200  | 1.74665500  |
| C | -0.46541400 | 5.03192200  | 0.79729600  |
| C | -1.72280300 | 5.40753100  | 0.32519900  |
| C | -2.61954700 | 4.44944000  | -0.16233300 |
| C | -2.27443100 | 3.09528300  | -0.18696500 |
| C | -1.00228200 | -1.83214100 | 2.18570400  |



---

|   |             |             |             |
|---|-------------|-------------|-------------|
| C | -1.59595700 | -1.58361800 | 3.50091300  |
| C | -1.36578600 | -2.71586500 | 4.32627900  |
| C | -0.62245800 | -3.70774500 | 3.52945500  |
| C | -0.42217400 | -3.16783300 | 2.22470100  |
| C | -0.12953200 | -4.95478300 | 3.86211000  |
| C | 0.58052600  | -5.68138600 | 2.88705600  |
| C | 0.79792100  | -5.15502100 | 1.61380500  |
| C | 0.30706200  | -3.89022700 | 1.27214900  |
| C | -2.33609800 | -0.49812000 | 3.97965000  |
| C | -2.78682300 | -0.52236100 | 5.30462600  |
| C | -2.53657700 | -1.62909800 | 6.11650200  |
| C | -1.82786300 | -2.74422600 | 5.62908700  |
| C | -1.08596900 | -2.16027200 | -1.13478500 |
| C | -2.30241500 | -2.87613000 | -0.96742000 |
| C | -2.53264500 | -4.02065800 | -1.73546700 |
| C | -1.59999600 | -4.50498200 | -2.65541300 |
| C | -0.39649100 | -3.80879300 | -2.78201700 |
| C | -0.11685300 | -2.65105000 | -2.04927800 |
| C | 1.23429900  | -2.00439500 | -2.24989800 |
| C | -3.38147800 | -2.46376800 | 0.01016000  |
| C | -1.88943600 | -5.72558100 | -3.49286900 |
| C | -0.60510200 | 0.80729400  | -2.22732900 |
| C | -1.80932000 | 0.69928700  | -2.97710500 |

---

|   |             |             |             |
|---|-------------|-------------|-------------|
| C | -1.84005000 | 1.15844700  | -4.29715600 |
| C | -0.72736400 | 1.71923900  | -4.92225900 |
| C | 0.44387100  | 1.83652500  | -4.16848100 |
| C | 0.52777000  | 1.41515400  | -2.84148600 |
| C | 1.84769300  | 1.61817200  | -2.13448600 |
| C | -3.09880800 | 0.13841400  | -2.42438800 |
| C | -0.77677600 | 2.17262300  | -6.35904500 |
| H | 1.91388800  | -0.32698700 | 1.12027300  |
| H | 4.01647000  | 0.59048000  | 2.07161300  |
| H | 4.25351400  | 3.01975700  | 2.47696000  |
| H | 2.40548000  | 4.58042900  | 1.93221900  |
| H | 0.22289700  | 5.77857000  | 1.18107300  |
| H | -2.01039500 | 6.45408700  | 0.33667400  |
| H | -3.59287900 | 4.76089100  | -0.52769500 |
| H | -2.97776900 | 2.36237800  | -0.56591500 |
| H | -0.27494600 | -5.37157600 | 4.85358000  |
| H | 0.97185900  | -6.66286600 | 3.13600300  |
| H | 1.35431400  | -5.72835700 | 0.88023600  |
| H | 0.48247900  | -3.49384500 | 0.28177400  |
| H | -2.56716300 | 0.34546500  | 3.33835400  |
| H | -3.35210100 | 0.31692200  | 5.69506000  |
| H | -2.90759000 | -1.63993000 | 7.13652300  |
| H | -1.65733600 | -3.60324300 | 6.27020500  |

---

|   |             |             |             |
|---|-------------|-------------|-------------|
| H | -3.47405200 | -4.54963900 | -1.60864600 |
| H | 0.35689500  | -4.17750800 | -3.47384800 |
| H | 1.95412100  | -2.73767900 | -2.62222500 |
| H | 1.18365100  | -1.19251900 | -2.98167700 |
| H | 1.63345100  | -1.57894500 | -1.32532200 |
| H | -3.47737300 | -1.38099900 | 0.11054500  |
| H | -4.35058800 | -2.85523100 | -0.30876500 |
| H | -3.19178000 | -2.86732600 | 1.01256900  |
| H | -2.55918400 | -6.41799700 | -2.97552900 |
| H | -2.37569100 | -5.44481700 | -4.43502100 |
| H | -0.97213100 | -6.26262900 | -3.74954400 |
| H | -2.77285100 | 1.07954700  | -4.85001700 |
| H | 1.32516800  | 2.27719000  | -4.62786000 |
| H | 2.65055700  | 1.74505100  | -2.86479900 |
| H | 1.83426800  | 2.51789200  | -1.51136500 |
| H | 2.11421400  | 0.78152800  | -1.48709300 |
| H | -3.19488100 | 0.28061200  | -1.34669000 |
| H | -3.95496600 | 0.62106700  | -2.90316600 |
| H | -3.18030000 | -0.93593600 | -2.61715800 |
| H | -1.80163400 | 2.37388300  | -6.68137900 |
| H | -0.18414400 | 3.07917800  | -6.51264700 |
| H | -0.36814800 | 1.40267700  | -7.02494400 |

---

**Cartesian coordinates for optimized structural geometry relative to TS2 in the proposed radical cation mechanism (Path A).**

|   |             |             |             |
|---|-------------|-------------|-------------|
| C | -0.86599300 | 0.60019600  | 1.35955500  |
| C | -0.90893900 | -0.79257100 | 1.07247200  |
| C | -0.88588500 | -0.90160100 | -0.41311600 |
| C | -0.65019500 | 0.34965500  | -0.95716900 |
| C | -0.50823600 | 1.35450900  | 0.17312000  |
| C | 0.77173900  | 1.45978700  | 1.09483400  |
| C | 0.85916500  | 2.81546500  | 1.55042700  |
| C | -0.21668100 | 3.60262800  | 0.97206000  |
| C | -0.99183900 | 2.78371300  | 0.12292100  |
| C | 1.81607600  | 0.54704000  | 1.35252300  |
| C | 2.88978800  | 0.96145500  | 2.12503300  |
| C | 2.94066200  | 2.27420800  | 2.63015600  |
| C | 1.93916100  | 3.20209900  | 2.34459400  |
| C | -0.53520500 | 4.95515300  | 1.14084900  |
| C | -1.62537500 | 5.47612400  | 0.44831500  |
| C | -2.39213100 | 4.65828800  | -0.39257700 |
| C | -2.09079600 | 3.30180100  | -0.55221700 |
| C | -0.87223700 | -1.72843000 | 2.12075300  |
| C | -1.28871400 | -1.40028500 | 3.49502900  |
| C | -1.04650100 | -2.52282900 | 4.32787900  |
| C | -0.46942700 | -3.58744200 | 3.49486300  |

---

|   |             |             |             |
|---|-------------|-------------|-------------|
| C | -0.38256900 | -3.11177800 | 2.15497800  |
| C | -0.02414200 | -4.85325500 | 3.83479400  |
| C | 0.52746600  | -5.66758400 | 2.83164100  |
| C | 0.64076000  | -5.20432500 | 1.52049600  |
| C | 0.19657500  | -3.92402200 | 1.17279700  |
| C | -1.90249600 | -0.25980600 | 4.02425400  |
| C | -2.20345200 | -0.22221100 | 5.39054400  |
| C | -1.93544700 | -1.32229000 | 6.20686700  |
| C | -1.36103800 | -2.49014900 | 5.67619300  |
| C | -1.16009600 | -2.15388700 | -1.17137300 |
| C | -2.37555500 | -2.85550700 | -0.96026800 |
| C | -2.62307100 | -4.02308700 | -1.68778800 |
| C | -1.70980700 | -4.53715200 | -2.61163000 |
| C | -0.50904800 | -3.84618000 | -2.78723300 |
| C | -0.21290000 | -2.66803300 | -2.09358000 |
| C | 1.13643400  | -2.02871800 | -2.33511300 |
| C | -3.43298500 | -2.40142900 | 0.02366200  |
| C | -2.01799800 | -5.78455600 | -3.40340100 |
| C | -0.68999200 | 0.78146000  | -2.37355100 |
| C | -1.85001400 | 0.60680400  | -3.17395500 |
| C | -1.82590500 | 1.02518900  | -4.50856000 |
| C | -0.70284400 | 1.61289500  | -5.09076500 |
| C | 0.41824100  | 1.81488700  | -4.27781500 |

---

|   |             |             |             |
|---|-------------|-------------|-------------|
| C | 0.44342600  | 1.43422900  | -2.93720700 |
| C | 1.69306700  | 1.72458900  | -2.13727700 |
| C | -3.14649100 | 0.03562100  | -2.64777100 |
| C | -0.69120000 | 2.01709400  | -6.54378500 |
| H | 1.75684000  | -0.47179800 | 0.98486200  |
| H | 3.69522400  | 0.26821200  | 2.34512600  |
| H | 3.78793200  | 2.57593800  | 3.23896700  |
| H | 2.01952200  | 4.22190000  | 2.70845600  |
| H | 0.05703000  | 5.59016500  | 1.79333800  |
| H | -1.88231700 | 6.52529800  | 0.55754300  |
| H | -3.23236900 | 5.08411000  | -0.93289200 |
| H | -2.69264200 | 2.68123500  | -1.20669400 |
| H | -0.08895000 | -5.21412000 | 4.85710900  |
| H | 0.87861900  | -6.66381400 | 3.08432600  |
| H | 1.07850100  | -5.84063000 | 0.75777200  |
| H | 0.29594400  | -3.58650200 | 0.15113900  |
| H | -2.15504000 | 0.58242800  | 3.38910500  |
| H | -2.67032400 | 0.66243200  | 5.81204000  |
| H | -2.19100200 | -1.28464000 | 7.26176500  |
| H | -1.17717300 | -3.34733800 | 6.31730900  |
| H | -3.56297100 | -4.54646100 | -1.52591800 |
| H | 0.22827100  | -4.23626100 | -3.48557600 |
| H | 1.83853700  | -2.76392100 | -2.73926900 |

---

|   |             |             |             |
|---|-------------|-------------|-------------|
| H | 1.07143600  | -1.20590400 | -3.05504300 |
| H | 1.57192400  | -1.61982800 | -1.41731700 |
| H | -3.51812400 | -1.31314200 | 0.08325000  |
| H | -4.41169700 | -2.79830100 | -0.26153800 |
| H | -3.22329100 | -2.76576900 | 1.03739300  |
| H | -2.65114600 | -6.47442800 | -2.83628600 |
| H | -2.55399100 | -5.53830300 | -4.32937500 |
| H | -1.10412000 | -6.31490400 | -3.68932000 |
| H | -2.72408500 | 0.89461600  | -5.10810100 |
| H | 1.29981200  | 2.29106200  | -4.70115400 |
| H | 2.51415600  | 2.00840100  | -2.80146500 |
| H | 1.53994300  | 2.55765000  | -1.44078600 |
| H | 2.02349200  | 0.86318500  | -1.54843900 |
| H | -3.31006300 | 0.27441900  | -1.59300800 |
| H | -3.99255300 | 0.43345400  | -3.21648900 |
| H | -3.17437400 | -1.05515300 | -2.73988200 |
| H | -0.19702600 | 1.25273500  | -7.15790400 |
| H | -1.70545400 | 2.14464600  | -6.93397100 |
| H | -0.14502100 | 2.95416300  | -6.69533400 |

**Cartesian coordinates for optimized geometry A3 in the proposed radical cation mechanism (Path A).**

|   |            |             |            |
|---|------------|-------------|------------|
| C | 0.56477600 | 1.15035200  | 0.99640100 |
| C | 0.33823600 | -0.27957700 | 0.79707500 |

---

|   |             |             |             |
|---|-------------|-------------|-------------|
| C | 0.04024100  | -0.43761600 | -0.62248600 |
| C | -0.01379100 | 0.85816600  | -1.22828400 |
| C | 0.23638800  | 1.83410700  | -0.22194900 |
| C | 1.25710000  | 1.84400800  | 2.03348600  |
| C | 1.29398500  | 3.28012600  | 1.98362700  |
| C | 0.63991900  | 3.99812300  | 0.88392900  |
| C | 0.17507700  | 3.27689000  | -0.25864700 |
| C | 1.97313400  | 1.17068600  | 3.06143300  |
| C | 2.65719500  | 1.86929600  | 4.03437600  |
| C | 2.65372900  | 3.27314900  | 4.00967100  |
| C | 1.99427100  | 3.95725700  | 2.99569900  |
| C | 0.48074000  | 5.39482200  | 0.90382100  |
| C | -0.09414300 | 6.07457300  | -0.16278500 |
| C | -0.53300500 | 5.36932800  | -1.28859300 |
| C | -0.40040000 | 3.99035600  | -1.33495700 |
| C | 0.26985600  | -1.26877200 | 1.78779700  |
| C | -0.31347100 | -1.09499400 | 3.13384400  |
| C | -0.28483000 | -2.34305700 | 3.80832900  |
| C | 0.37591200  | -3.32041200 | 2.93104000  |
| C | 0.68124700  | -2.67605900 | 1.70151500  |
| C | 0.74551500  | -4.63679700 | 3.15728000  |
| C | 1.44359800  | -5.32258800 | 2.15115500  |
| C | 1.78960400  | -4.68402300 | 0.95825000  |



---

|   |             |             |             |
|---|-------------|-------------|-------------|
| C | 1.42633300  | -3.35378800 | 0.73117100  |
| C | -0.98497300 | -0.01052500 | 3.70777900  |
| C | -1.56153600 | -0.15995000 | 4.97229000  |
| C | -1.49422400 | -1.38233300 | 5.64550600  |
| C | -0.86545100 | -2.49074700 | 5.05937400  |
| C | -0.38375000 | -1.68235500 | -1.30272200 |
| C | -1.58819500 | -2.33177400 | -0.91192500 |
| C | -1.99386600 | -3.47492700 | -1.60311800 |
| C | -1.24895600 | -4.02283400 | -2.65099600 |
| C | -0.05442400 | -3.38617100 | -3.00095800 |
| C | 0.38824300  | -2.22764600 | -2.36280900 |
| C | 1.71950100  | -1.64806600 | -2.78503600 |
| C | -2.48405200 | -1.83172100 | 0.20096300  |
| C | -1.72764300 | -5.24581100 | -3.39038500 |
| C | -0.25054200 | 1.13539500  | -2.67318900 |
| C | -1.52419300 | 0.97358400  | -3.26302900 |
| C | -1.68001800 | 1.24450700  | -4.62752800 |
| C | -0.62036300 | 1.66783300  | -5.43003300 |
| C | 0.62512900  | 1.85340500  | -4.81911400 |
| C | 0.83165600  | 1.61266300  | -3.45989600 |
| C | 2.19507100  | 1.90699400  | -2.87269600 |
| C | -2.74547400 | 0.57018900  | -2.46886300 |
| C | -0.80422300 | 1.91445200  | -6.90688100 |

---

|   |             |             |             |
|---|-------------|-------------|-------------|
| H | 2.00921400  | 0.09010100  | 3.05821600  |
| H | 3.21089900  | 1.33680300  | 4.80025700  |
| H | 3.19381300  | 3.83129600  | 4.76786000  |
| H | 2.05930300  | 5.03795600  | 2.97917000  |
| H | 0.79312200  | 5.96516100  | 1.76995400  |
| H | -0.20617800 | 7.15295700  | -0.11494700 |
| H | -0.98989900 | 5.89560400  | -2.12020900 |
| H | -0.76617800 | 3.44945000  | -2.19660800 |
| H | 0.51953600  | -5.12852700 | 4.09825500  |
| H | 1.73846700  | -6.35462100 | 2.31339400  |
| H | 2.35428500  | -5.22095300 | 0.20339500  |
| H | 1.72726500  | -2.86377300 | -0.18440800 |
| H | -1.06649300 | 0.93717500  | 3.18911600  |
| H | -2.07302400 | 0.68013700  | 5.43031800  |
| H | -1.95135300 | -1.48221800 | 6.62494700  |
| H | -0.85320400 | -3.44703100 | 5.57289200  |
| H | -2.92724900 | -3.95124500 | -1.31302900 |
| H | 0.55925300  | -3.80983700 | -3.79211000 |
| H | 2.36647300  | -2.43269300 | -3.18641900 |
| H | 1.59429500  | -0.89570400 | -3.56903900 |
| H | 2.24941900  | -1.17169500 | -1.95557800 |
| H | -2.41899100 | -0.75284100 | 0.35005200  |
| H | -3.52700800 | -2.07657000 | -0.01627900 |

---

|   |             |             |             |
|---|-------------|-------------|-------------|
| H | -2.23636400 | -2.30995800 | 1.15492600  |
| H | -2.30443500 | -5.90856600 | -2.73929100 |
| H | -2.37971300 | -4.96325200 | -4.22605600 |
| H | -0.89267800 | -5.81444400 | -3.80852800 |
| H | -2.66646500 | 1.12748500  | -5.06958500 |
| H | 1.46197000  | 2.20514900  | -5.41781100 |
| H | 2.95541900  | 1.92549000  | -3.65720500 |
| H | 2.20884300  | 2.88793200  | -2.38366700 |
| H | 2.50158600  | 1.17161000  | -2.12525200 |
| H | -2.67944500 | 0.88390900  | -1.42395400 |
| H | -3.64369600 | 1.02404900  | -2.89613400 |
| H | -2.89123200 | -0.51456500 | -2.48062600 |
| H | -0.45767500 | 1.05444800  | -7.49259800 |
| H | -1.85507000 | 2.07979200  | -7.15812200 |
| H | -0.23135800 | 2.78420500  | -7.24200800 |

**Cartesian coordinates for optimized geometry B1 in the proposed cation mechanism (Path B).**

|   |             |             |             |
|---|-------------|-------------|-------------|
| C | -0.90292900 | 0.29498600  | 0.68823300  |
| C | -0.89868200 | -1.22945000 | 0.85805400  |
| C | -0.88581200 | -1.39585900 | -0.60333000 |
| C | -0.78503100 | -0.05266400 | -0.86715900 |
| C | 0.18763700  | 1.15832300  | 1.13837900  |
| C | 1.51236900  | 0.82891400  | 1.62763300  |
| C | 2.21861000  | 2.04601300  | 1.87354200  |

---

|   |             |             |            |
|---|-------------|-------------|------------|
| C | 1.32262600  | 3.16779200  | 1.52433100 |
| C | 0.09506600  | 2.60335000  | 1.07815600 |
| C | 2.12599100  | -0.40446700 | 1.88818400 |
| C | 3.44200800  | -0.41586600 | 2.36416300 |
| C | 4.12074600  | 0.77899800  | 2.60040400 |
| C | 3.50917300  | 2.02784800  | 2.35899900 |
| C | 1.48995700  | 4.53675500  | 1.56111200 |
| C | 0.41955400  | 5.35556100  | 1.13870600 |
| C | -0.78317800 | 4.80967100  | 0.69005500 |
| C | -0.95892100 | 3.42097600  | 0.65629600 |
| C | -0.91326500 | -1.99796300 | 1.98281700 |
| C | -0.75663500 | -3.46898200 | 2.09805900 |
| C | -0.86043400 | -3.82895700 | 3.46556900 |
| C | -1.08461100 | -2.61242000 | 4.25339000 |
| C | -1.09293500 | -1.50261700 | 3.37254500 |
| C | -1.27344900 | -2.44489100 | 5.62190300 |
| C | -1.47486200 | -1.15632900 | 6.12391300 |
| C | -1.49175600 | -0.05515800 | 5.26267800 |
| C | -1.30369500 | -0.22125200 | 3.88808700 |
| C | -0.47175400 | -4.45135100 | 1.14573700 |
| C | -0.33037500 | -5.77996100 | 1.55858700 |
| C | -0.45878300 | -6.12977600 | 2.90513900 |
| C | -0.71798800 | -5.15147500 | 3.87088200 |

---

|   |             |             |             |
|---|-------------|-------------|-------------|
| H | -1.87607500 | 0.75271900  | 0.89372900  |
| C | -1.15394000 | -2.52846700 | -1.52040300 |
| C | -0.19942000 | -2.92604200 | -2.48640400 |
| C | -0.50545300 | -3.98333600 | -3.34721300 |
| C | -1.73351100 | -4.64777300 | -3.30240800 |
| C | -2.66345400 | -4.23825200 | -2.34114600 |
| C | -2.40208900 | -3.20104300 | -1.44427600 |
| C | -3.45067800 | -2.86063500 | -0.40868500 |
| C | 1.14966100  | -2.25835400 | -2.60575800 |
| C | -2.05714900 | -5.75684100 | -4.27181500 |
| C | -0.81679400 | 0.83467800  | -2.03895200 |
| C | -2.07401400 | 1.11433300  | -2.64447800 |
| C | -2.11882700 | 1.94653100  | -3.76153100 |
| C | -0.96566700 | 2.51949900  | -4.31104600 |
| C | 0.25664200  | 2.24648900  | -3.69416800 |
| C | 0.35754700  | 1.42524200  | -2.56738500 |
| C | 1.72307300  | 1.22890600  | -1.94882400 |
| C | -3.35701600 | 0.50568100  | -2.13078900 |
| C | -1.04405600 | 3.38436400  | -5.54363700 |
| H | 1.59545100  | -1.33497500 | 1.73323400  |
| H | 3.93055800  | -1.36292700 | 2.56548600  |
| H | 5.13585900  | 0.75182100  | 2.98403600  |
| H | 4.05302200  | 2.94604200  | 2.55670700  |

---

|   |             |             |             |
|---|-------------|-------------|-------------|
| H | 2.41606800  | 4.98819600  | 1.90227100  |
| H | 0.53865800  | 6.43424800  | 1.16405900  |
| H | -1.58601600 | 5.46368700  | 0.36808200  |
| H | -1.89370900 | 2.99879800  | 0.30337000  |
| H | -1.27020700 | -3.29919500 | 6.29195700  |
| H | -1.62299300 | -1.00947100 | 7.18917400  |
| H | -1.65437500 | 0.94008500  | 5.66420900  |
| H | -1.33017100 | 0.65400500  | 3.24930400  |
| H | -0.35962900 | -4.20393700 | 0.09816700  |
| H | -0.11625200 | -6.54647300 | 0.82062800  |
| H | -0.34706500 | -7.16673200 | 3.20633200  |
| H | -0.79718400 | -5.42436500 | 4.91885100  |
| H | 0.23931200  | -4.29463000 | -4.07530100 |
| H | -3.62268400 | -4.74660300 | -2.28266100 |
| H | -3.20356500 | -3.30345700 | 0.56225300  |
| H | -3.55737400 | -1.78429300 | -0.25539500 |
| H | -4.42471200 | -3.25422000 | -0.70896500 |
| H | 1.60843400  | -2.08302400 | -1.62808000 |
| H | 1.83460800  | -2.87679600 | -3.19068600 |
| H | 1.06946400  | -1.28964500 | -3.10986700 |
| H | -1.15055800 | -6.23454700 | -4.65262100 |
| H | -2.68100800 | -6.52586500 | -3.80727200 |
| H | -2.61062100 | -5.36956300 | -5.13600600 |

---

|   |             |             |             |
|---|-------------|-------------|-------------|
| H | -3.08241100 | 2.14973400  | -4.22214400 |
| H | 1.16433900  | 2.68649000  | -4.10018200 |
| H | 2.49159300  | 1.16476400  | -2.72441200 |
| H | 1.98774400  | 2.07954900  | -1.31040900 |
| H | 1.78293800  | 0.32604300  | -1.34047100 |
| H | -3.47081200 | 0.62307800  | -1.04730600 |
| H | -4.22313400 | 0.97089700  | -2.60678500 |
| H | -3.39709800 | -0.56751300 | -2.34365300 |
| H | -1.93366400 | 4.02102300  | -5.52997500 |
| H | -0.16428700 | 4.02533600  | -5.64223200 |
| H | -1.10401300 | 2.76658500  | -6.44782600 |

**Cartesian coordinates for optimized structural geometry relative to transition state TS3 in the proposed cation mechanism (Path B).**

|   |             |             |             |
|---|-------------|-------------|-------------|
| C | -1.11043400 | 0.32637200  | 0.90580500  |
| C | -1.07798900 | -1.17495200 | 1.01968500  |
| C | -0.78944400 | -1.26298400 | -0.39626400 |
| C | -0.58623200 | 0.14224800  | -0.62570600 |
| C | 0.17787500  | 0.96119800  | 0.81347400  |
| C | 1.51951100  | 0.50636500  | 1.31253700  |
| C | 2.30590100  | 1.66039900  | 1.54511400  |
| C | 1.52614800  | 2.85574600  | 1.19506100  |
| C | 0.26138800  | 2.44709300  | 0.72227800  |
| C | 2.05646200  | -0.75813600 | 1.55637400  |

---

|   |             |             |             |
|---|-------------|-------------|-------------|
| C | 3.36382100  | -0.86029200 | 2.04340100  |
| C | 4.13015500  | 0.28275300  | 2.28528200  |
| C | 3.60371200  | 1.55294000  | 2.03664300  |
| C | 1.84065100  | 4.20816400  | 1.28539000  |
| C | 0.88240600  | 5.14986500  | 0.89262400  |
| C | -0.37234600 | 4.74489900  | 0.42792100  |
| C | -0.69556700 | 3.38620600  | 0.34441600  |
| C | -1.14944500 | -1.98356800 | 2.12017900  |
| C | -0.85523300 | -3.42728200 | 2.24524600  |
| C | -1.04073600 | -3.80679400 | 3.60014900  |
| C | -1.45627900 | -2.62141700 | 4.36407600  |
| C | -1.50883500 | -1.51865900 | 3.47607600  |
| C | -1.75666800 | -2.46712100 | 5.71034500  |
| C | -2.11158200 | -1.19514700 | 6.18049000  |
| C | -2.16628100 | -0.10238900 | 5.31203100  |
| C | -1.87389700 | -0.25764700 | 3.95298100  |
| C | -0.38658400 | -4.36411100 | 1.32015800  |
| C | -0.13967600 | -5.67456400 | 1.74359500  |
| C | -0.34934100 | -6.04550800 | 3.07371800  |
| C | -0.79612500 | -5.10862100 | 4.01531800  |
| H | -2.01187800 | 0.91132700  | 1.06128800  |
| C | -0.97923100 | -2.33310500 | -1.37847400 |
| C | 0.01011000  | -2.56927700 | -2.37562300 |



---

|   |             |             |             |
|---|-------------|-------------|-------------|
| C | -0.19810500 | -3.58456900 | -3.30911800 |
| C | -1.36490500 | -4.35207600 | -3.33154600 |
| C | -2.32963900 | -4.10214500 | -2.34847700 |
| C | -2.16557700 | -3.13188500 | -1.36158100 |
| C | -3.27782200 | -2.99199200 | -0.34352500 |
| C | 1.31454000  | -1.81203300 | -2.43990100 |
| C | -1.58939900 | -5.40410900 | -4.38658000 |
| C | -0.79701300 | 0.95136800  | -1.85704900 |
| C | -2.11617200 | 1.07575400  | -2.38192400 |
| C | -2.32691000 | 1.83879400  | -3.53015500 |
| C | -1.28233200 | 2.47464300  | -4.20885200 |
| C | 0.00195300  | 2.33639200  | -3.68704500 |
| C | 0.27033200  | 1.60087300  | -2.52645800 |
| C | 1.71302500  | 1.57145200  | -2.06979200 |
| C | -3.31995700 | 0.40030400  | -1.76460600 |
| C | -1.54093700 | 3.26241600  | -5.46912700 |
| H | 1.48892900  | -1.66276000 | 1.37832400  |
| H | 3.78333200  | -1.84296300 | 2.23631500  |
| H | 5.14239200  | 0.18391400  | 2.66593100  |
| H | 4.20093400  | 2.44060400  | 2.22418500  |
| H | 2.80685300  | 4.53377500  | 1.65972800  |
| H | 1.11546300  | 6.20876900  | 0.95495800  |
| H | -1.10341300 | 5.48931800  | 0.12815300  |

---

|   |             |             |             |
|---|-------------|-------------|-------------|
| H | -1.66902600 | 3.08653000  | -0.03123900 |
| H | -1.71858800 | -3.31103400 | 6.39305200  |
| H | -2.34974700 | -1.05939200 | 7.23130100  |
| H | -2.44515700 | 0.87562900  | 5.69177800  |
| H | -1.93726900 | 0.60460800  | 3.29874600  |
| H | -0.21394700 | -4.09617500 | 0.28486200  |
| H | 0.21933200  | -6.40818100 | 1.02830000  |
| H | -0.15491500 | -7.06760400 | 3.38527600  |
| H | -0.93665800 | -5.40036000 | 5.05208600  |
| H | 0.57972500  | -3.78130800 | -4.04300700 |
| H | -3.24443900 | -4.68996200 | -2.34835300 |
| H | -3.06354800 | -3.58116000 | 0.55531000  |
| H | -3.44946000 | -1.96281300 | -0.02434800 |
| H | -4.21395200 | -3.37176500 | -0.76238900 |
| H | 2.08491300  | -2.42618800 | -2.91527600 |
| H | 1.20623300  | -0.90349100 | -3.04125300 |
| H | 1.68487800  | -1.51763700 | -1.45492600 |
| H | -2.19154700 | -5.00083500 | -5.21149400 |
| H | -0.64499200 | -5.75546200 | -4.81238700 |
| H | -2.13034300 | -6.26685900 | -3.98458100 |
| H | -3.34126900 | 1.93544100  | -3.91072300 |
| H | 0.83348700  | 2.82348700  | -4.19201100 |
| H | 2.37428600  | 1.36254600  | -2.91795400 |

---

|   |             |             |             |
|---|-------------|-------------|-------------|
| H | 2.00787300  | 2.54841600  | -1.67110000 |
| H | 1.91214600  | 0.82570000  | -1.30197100 |
| H | -3.33732400 | -0.66953200 | -1.99906600 |
| H | -3.35944100 | 0.49663800  | -0.67458900 |
| H | -4.24298600 | 0.83226700  | -2.16074200 |
| H | -0.71189800 | 3.93856800  | -5.69785900 |
| H | -1.66816900 | 2.59318800  | -6.32986700 |
| H | -2.45617600 | 3.85849800  | -5.38728600 |

**Cartesian coordinates for optimized geometry B2 in the proposed cation mechanism (Path B).**

|   |             |             |             |
|---|-------------|-------------|-------------|
| C | -1.41516500 | 0.58439500  | 0.56139000  |
| C | -1.23762900 | -0.87617500 | 0.83716400  |
| C | -0.86011500 | -1.06083700 | -0.53914900 |
| C | -0.68568900 | 0.34855700  | -0.91856300 |
| C | -0.13896000 | 1.25667000  | 0.29185100  |
| C | 1.17809000  | 0.99356800  | 0.99732800  |
| C | 1.76637300  | 2.23880800  | 1.30912500  |
| C | 0.91009300  | 3.32097700  | 0.80857500  |
| C | -0.20379400 | 2.76093600  | 0.15348300  |
| C | 1.83919300  | -0.18905800 | 1.31910200  |
| C | 3.07203200  | -0.12189300 | 1.97820400  |
| C | 3.64072400  | 1.11106700  | 2.30677400  |
| C | 2.99281100  | 2.30032500  | 1.96995300  |
| C | 1.05256400  | 4.70537600  | 0.89799100  |

---

|   |             |             |             |
|---|-------------|-------------|-------------|
| C | 0.07324400  | 5.52257700  | 0.32886300  |
| C | -1.03547100 | 4.96423700  | -0.31416300 |
| C | -1.18534700 | 3.57591400  | -0.40183300 |
| C | -1.27782200 | -1.58173900 | 2.00814700  |
| C | -0.82675000 | -2.96013500 | 2.28986000  |
| C | -1.03522900 | -3.22474800 | 3.66868000  |
| C | -1.62400000 | -2.02838500 | 4.28931200  |
| C | -1.76201800 | -1.03451400 | 3.28851900  |
| C | -2.00584400 | -1.77553000 | 5.59890300  |
| C | -2.52802100 | -0.51350300 | 5.91683000  |
| C | -2.66659000 | 0.47150000  | 4.93658900  |
| C | -2.29434800 | 0.21544400  | 3.61282700  |
| C | -0.21554500 | -3.92249900 | 1.48192300  |
| C | 0.15763200  | -5.14668000 | 2.04665300  |
| C | -0.06960400 | -5.40653800 | 3.39988800  |
| C | -0.66458100 | -4.44176600 | 4.22381000  |
| H | -2.35673300 | 1.11992500  | 0.59232200  |
| C | -0.97189600 | -2.21647700 | -1.42003600 |
| C | 0.04938300  | -2.46490600 | -2.38855200 |
| C | -0.05813700 | -3.58488800 | -3.21083900 |
| C | -1.15399800 | -4.44996300 | -3.15928800 |
| C | -2.15064700 | -4.18788900 | -2.21108200 |
| C | -2.08465400 | -3.11532100 | -1.32546800 |

---

|   |             |             |             |
|---|-------------|-------------|-------------|
| C | -3.22685300 | -2.97015700 | -0.34366600 |
| C | 1.29318100  | -1.62118200 | -2.52182000 |
| C | -1.27184500 | -5.61686600 | -4.10248400 |
| C | -0.94105600 | 0.94000400  | -2.26685300 |
| C | -2.22369800 | 0.83890900  | -2.87583600 |
| C | -2.43064900 | 1.41424700  | -4.13069000 |
| C | -1.41569800 | 2.07089700  | -4.83187000 |
| C | -0.16450500 | 2.15701300  | -4.22336300 |
| C | 0.09575800  | 1.62063400  | -2.95803500 |
| C | 1.49432400  | 1.82405900  | -2.41492700 |
| C | -3.40492300 | 0.14098700  | -2.24015300 |
| C | -1.66511000 | 2.64698500  | -6.20286800 |
| H | 1.42574500  | -1.16006900 | 1.07513700  |
| H | 3.58933700  | -1.04087300 | 2.23445500  |
| H | 4.59746100  | 1.14439600  | 2.81830600  |
| H | 3.44354700  | 3.25802100  | 2.21139400  |
| H | 1.90658800  | 5.14454600  | 1.40427500  |
| H | 0.17255100  | 6.60180400  | 0.38870200  |
| H | -1.78743800 | 5.61205400  | -0.75299300 |
| H | -2.04447000 | 3.15918300  | -0.91707100 |
| H | -1.90373400 | -2.53382400 | 6.36885700  |
| H | -2.83157400 | -0.30150900 | 6.93714000  |
| H | -3.07506900 | 1.44130700  | 5.20059000  |

---

|   |             |             |             |
|---|-------------|-------------|-------------|
| H | -2.42768200 | 0.99045300  | 2.86697300  |
| H | -0.02900900 | -3.74018300 | 0.43077400  |
| H | 0.62953300  | -5.90037100 | 1.42481900  |
| H | 0.22513700  | -6.36261800 | 3.82092900  |
| H | -0.82117000 | -4.64537900 | 5.27848900  |
| H | 0.74409300  | -3.78803700 | -3.91498200 |
| H | -3.01110600 | -4.84938800 | -2.15796300 |
| H | -2.98507400 | -3.44826200 | 0.61086900  |
| H | -3.48933700 | -1.93372700 | -0.13173000 |
| H | -4.11639100 | -3.46675600 | -0.73795600 |
| H | 1.63115400  | -1.20520100 | -1.57139200 |
| H | 2.11000300  | -2.22076900 | -2.93051600 |
| H | 1.12282700  | -0.78824800 | -3.20995100 |
| H | -0.29325200 | -5.94321100 | -4.46286700 |
| H | -1.76996700 | -6.46706300 | -3.62850500 |
| H | -1.86888000 | -5.33961700 | -4.98014400 |
| H | -3.42043300 | 1.34617700  | -4.57518600 |
| H | 0.64246200  | 2.66771900  | -4.74304400 |
| H | 2.23064100  | 1.68113900  | -3.21134100 |
| H | 1.61575900  | 2.84778700  | -2.04683200 |
| H | 1.75276100  | 1.15020100  | -1.60025600 |
| H | -3.47838100 | 0.30823800  | -1.16289300 |
| H | -4.33684500 | 0.49558300  | -2.68631700 |

---

|   |             |             |             |
|---|-------------|-------------|-------------|
| H | -3.36243300 | -0.94077400 | -2.40170700 |
| H | -2.66011000 | 3.09635400  | -6.27191500 |
| H | -0.92584200 | 3.41034600  | -6.45803900 |
| H | -1.60987600 | 1.86540700  | -6.97023500 |

**Cartesian coordinates for optimized structural geometry relative to transition state TS4 in the proposed cation mechanism (Path B).**

|   |             |             |             |
|---|-------------|-------------|-------------|
| C | -0.79877200 | -0.81375600 | 1.12934700  |
| C | -0.80369100 | -0.92148900 | -0.35383200 |
| C | -0.72967100 | 0.34226600  | -0.91510900 |
| C | -0.76391100 | 1.34477900  | 0.17406100  |
| C | 0.58513700  | 1.53433900  | 1.20206900  |
| C | 0.58040400  | 2.93072200  | 1.51814400  |
| C | -0.58951200 | 3.61297800  | 0.97309900  |
| C | -1.30636400 | 2.74144400  | 0.12926000  |
| C | 1.75714700  | 0.76917100  | 1.39690900  |
| C | 2.87480600  | 1.36496200  | 1.95833400  |
| C | 2.84057900  | 2.71876500  | 2.33648000  |
| C | 1.70678300  | 3.50023200  | 2.11411700  |
| C | -1.00563700 | 4.93560900  | 1.14516900  |
| C | -2.13906800 | 5.37843700  | 0.46159900  |
| C | -2.84300100 | 4.51167600  | -0.37953900 |
| C | -2.43864100 | 3.18021000  | -0.54507800 |
| C | -0.71726200 | -1.74093900 | 2.16852700  |

---

|   |             |             |             |
|---|-------------|-------------|-------------|
| C | -0.79417400 | -1.37291600 | 3.61234600  |
| C | -1.09937900 | -2.54306700 | 4.35475900  |
| C | -1.02294900 | -3.69358800 | 3.44985600  |
| C | -0.69310500 | -3.22474600 | 2.14914700  |
| C | -1.11849000 | -5.04773200 | 3.73143400  |
| C | -0.82960600 | -5.97022600 | 2.71632200  |
| C | -0.42525100 | -5.52604800 | 1.45784000  |
| C | -0.35230700 | -4.15931600 | 1.16505700  |
| C | -0.59172200 | -0.17377500 | 4.30818000  |
| C | -0.79367900 | -0.13300300 | 5.69341700  |
| C | -1.17754900 | -1.27599600 | 6.39347800  |
| C | -1.31480300 | -2.49934300 | 5.72431000  |
| C | -0.96473800 | -2.16629600 | -1.15639900 |
| C | -2.19103500 | -2.87498600 | -1.08417500 |
| C | -2.36196100 | -4.01484800 | -1.87425800 |
| C | -1.35937400 | -4.49348000 | -2.72310300 |
| C | -0.15048100 | -3.79482400 | -2.75850900 |
| C | 0.06597500  | -2.63759900 | -2.00247200 |
| C | 1.41682500  | -1.96557700 | -2.09672800 |
| C | -3.31951800 | -2.47545400 | -0.15781900 |
| C | -1.58339800 | -5.71255200 | -3.58447800 |
| C | -0.70633600 | 0.75056500  | -2.35105800 |
| C | -1.82972300 | 0.55358800  | -3.19057500 |



---

|   |             |             |             |
|---|-------------|-------------|-------------|
| C | -1.76326800 | 0.96193800  | -4.52810800 |
| C | -0.62928100 | 1.56143200  | -5.07377900 |
| C | 0.45616000  | 1.78392700  | -4.22123700 |
| C | 0.43708300  | 1.40873000  | -2.87713600 |
| C | 1.64785400  | 1.73454300  | -2.03108600 |
| C | -3.13263200 | -0.04418100 | -2.71116800 |
| C | -0.56962700 | 1.95375700  | -6.52974300 |
| H | 1.75855300  | -0.29056400 | 1.16561500  |
| H | 3.77223000  | 0.77807600  | 2.12517700  |
| H | 3.71944400  | 3.16959800  | 2.78797600  |
| H | 1.72055700  | 4.55920100  | 2.35325000  |
| H | -0.45781200 | 5.61334800  | 1.79351400  |
| H | -2.47102800 | 6.40542100  | 0.57795300  |
| H | -3.71253800 | 4.87434200  | -0.91927800 |
| H | -2.99162800 | 2.51794100  | -1.20155900 |
| H | -1.38623500 | -5.39315700 | 4.72573400  |
| H | -0.89273600 | -7.03478900 | 2.92198300  |
| H | -0.15790800 | -6.24458600 | 0.68935400  |
| H | -0.00857900 | -3.85259500 | 0.18957200  |
| H | -0.22146400 | 0.71925100  | 3.82288500  |
| H | -0.63214300 | 0.79908300  | 6.22623100  |
| H | -1.33770000 | -1.22674800 | 7.46638900  |
| H | -1.56489200 | -3.40018100 | 6.27705700  |

---

|   |             |             |             |
|---|-------------|-------------|-------------|
| H | -3.30820200 | -4.54886700 | -1.81886600 |
| H | 0.65295300  | -4.15801900 | -3.39565700 |
| H | 2.17506800  | -2.67497400 | -2.44144000 |
| H | 1.39879600  | -1.13236500 | -2.80784400 |
| H | 1.74840700  | -1.56585800 | -1.13285200 |
| H | -3.41502200 | -1.39258000 | -0.04637900 |
| H | -4.27408000 | -2.85924900 | -0.52974900 |
| H | -3.17086000 | -2.89365400 | 0.84513200  |
| H | -2.26489300 | -6.42344400 | -3.10614700 |
| H | -2.02960600 | -5.43375500 | -4.54807000 |
| H | -0.64365200 | -6.23071600 | -3.80027200 |
| H | -2.63681600 | 0.81055400  | -5.15864600 |
| H | 1.34596800  | 2.27231200  | -4.61261800 |
| H | 2.49408800  | 2.01190800  | -2.66607800 |
| H | 1.45604900  | 2.58274900  | -1.36239600 |
| H | 1.96197000  | 0.89253900  | -1.40758800 |
| H | -3.33342500 | 0.17871900  | -1.65938700 |
| H | -3.96812400 | 0.34454900  | -3.30173100 |
| H | -3.13795500 | -1.13406400 | -2.81531600 |
| H | -1.57048600 | 2.09866900  | -6.94803600 |
| H | -0.00182200 | 2.87907600  | -6.67325200 |
| H | -0.07551500 | 1.17527600  | -7.12572200 |
| C | -0.88293600 | 0.62388500  | 1.41597500  |

---

|   |             |            |            |
|---|-------------|------------|------------|
| H | -1.40165700 | 1.02553600 | 2.27574500 |
|---|-------------|------------|------------|

**Cartesian coordinates for optimized geometry B3 in the proposed cation mechanism (Path B).**

|   |             |             |             |
|---|-------------|-------------|-------------|
| C | 0.12091800  | -0.25765000 | 0.88582100  |
| C | -0.07527600 | -0.41823800 | -0.52195500 |
| C | -0.13933800 | 0.86928300  | -1.16608300 |
| C | -0.02510700 | 1.85791200  | -0.19102600 |
| C | 1.21799300  | 1.90882300  | 1.96614000  |
| C | 1.37315100  | 3.30616300  | 1.79706200  |
| C | 0.55958700  | 4.02694000  | 0.79477600  |
| C | -0.05334500 | 3.29677100  | -0.27152300 |
| C | 2.04561300  | 1.22655500  | 2.85770700  |
| C | 3.01996400  | 1.90404800  | 3.59343400  |
| C | 3.16907900  | 3.28147100  | 3.44481400  |
| C | 2.35815600  | 3.97008500  | 2.54777800  |
| C | 0.43143600  | 5.42208500  | 0.79894500  |
| C | -0.24535100 | 6.08782000  | -0.22037500 |
| C | -0.81008600 | 5.37390400  | -1.28381200 |
| C | -0.71021500 | 3.99111300  | -1.31193000 |
| C | 0.13428200  | -1.24888300 | 1.87660100  |
| C | -0.39830300 | -1.11555100 | 3.25326200  |
| C | -0.37274300 | -2.39721200 | 3.86843200  |
| C | 0.28935600  | -3.33599300 | 2.95322900  |
| C | 0.61337200  | -2.63613200 | 1.76257200  |

---

|   |             |             |             |
|---|-------------|-------------|-------------|
| C | 0.66834600  | -4.65637600 | 3.13383100  |
| C | 1.41389300  | -5.28634400 | 2.12443800  |
| C | 1.79630100  | -4.58631800 | 0.97848800  |
| C | 1.41139100  | -3.25480300 | 0.79581600  |
| C | -0.96602500 | -0.03979300 | 3.94806400  |
| C | -1.48828200 | -0.24492200 | 5.22898500  |
| C | -1.46360000 | -1.51140700 | 5.81483700  |
| C | -0.90423300 | -2.60135900 | 5.13194200  |
| C | -0.40745700 | -1.68438600 | -1.23340300 |
| C | -1.61929900 | -2.35820400 | -0.92609900 |
| C | -1.94958400 | -3.50961500 | -1.64448500 |
| C | -1.12527000 | -4.03346100 | -2.64425800 |
| C | 0.07109000  | -3.36576700 | -2.91240200 |
| C | 0.44340600  | -2.19942900 | -2.23911500 |
| C | 1.78523400  | -1.58607500 | -2.57569000 |
| C | -2.59336500 | -1.88772400 | 0.13488500  |
| C | -1.52629300 | -5.26597100 | -3.41660200 |
| C | -0.27028900 | 1.12480200  | -2.63325300 |
| C | -1.50125000 | 0.94445100  | -3.30532200 |
| C | -1.57166200 | 1.21394400  | -4.67572000 |
| C | -0.46612300 | 1.65372600  | -5.40758600 |
| C | 0.73092600  | 1.85814500  | -4.71664800 |
| C | 0.85114700  | 1.61947000  | -3.34413200 |

---

|   |             |             |             |
|---|-------------|-------------|-------------|
| C | 2.16917900  | 1.94915100  | -2.67493200 |
| C | -2.76228500 | 0.50965400  | -2.59256900 |
| C | -0.56097500 | 1.89457900  | -6.89475100 |
| H | 1.94781300  | 0.15497300  | 2.97923900  |
| H | 3.66582700  | 1.35051900  | 4.26844000  |
| H | 3.92823100  | 3.81633800  | 4.00735900  |
| H | 2.52032900  | 5.03275500  | 2.40370600  |
| H | 0.85431800  | 6.00111600  | 1.61244900  |
| H | -0.33307100 | 7.16982300  | -0.18550400 |
| H | -1.33884500 | 5.89613000  | -2.07492300 |
| H | -1.17364800 | 3.43172100  | -2.11486500 |
| H | 0.41816200  | -5.19304600 | 4.04426900  |
| H | 1.72037300  | -6.32042500 | 2.25175400  |
| H | 2.40638600  | -5.07454200 | 0.22516500  |
| H | 1.74713400  | -2.71698200 | -0.07930300 |
| H | -0.99054400 | 0.96136800  | 3.53859600  |
| H | -1.91548700 | 0.59337000  | 5.77013700  |
| H | -1.87966500 | -1.65545200 | 6.80750900  |
| H | -0.89189200 | -3.58588500 | 5.59024700  |
| H | -2.88634400 | -4.01255000 | -1.41399200 |
| H | 0.74507900  | -3.76635100 | -3.66670500 |
| H | 2.50508100  | -2.36687500 | -2.84244500 |
| H | 1.71030800  | -0.90810200 | -3.43215700 |

---

|   |             |             |             |
|---|-------------|-------------|-------------|
| H | 2.20992800  | -1.01597500 | -1.74374100 |
| H | -2.62893700 | -0.79903700 | 0.22865000  |
| H | -3.60418100 | -2.23158100 | -0.10315900 |
| H | -2.34220900 | -2.29376400 | 1.12211500  |
| H | -2.05157200 | -5.98571600 | -2.78015600 |
| H | -2.20436500 | -5.00753000 | -4.24038900 |
| H | -0.65721100 | -5.76631500 | -3.85449100 |
| H | -2.52463900 | 1.08084000  | -5.18331400 |
| H | 1.59918600  | 2.22724300  | -5.25835700 |
| H | 2.99193900  | 1.88777300  | -3.39344900 |
| H | 2.16263600  | 2.97261200  | -2.27893900 |
| H | 2.40346800  | 1.28449300  | -1.83957400 |
| H | -2.82133400 | 0.90972200  | -1.57482500 |
| H | -3.64680400 | 0.85634600  | -3.13532600 |
| H | -2.82929100 | -0.58137600 | -2.52156800 |
| H | -1.56300300 | 2.22743700  | -7.18404700 |
| H | 0.15892400  | 2.64937900  | -7.22655000 |
| H | -0.35032400 | 0.97444800  | -7.45537800 |
| C | 0.10452400  | 1.23604300  | 1.16662400  |
| H | -0.85177700 | 1.45981400  | 1.67038700  |

## References

- [1] S. Qiu, Y. Zhang, X. Huang, L. Bao, Y. Hong, Z. Zeng, J. Wu, *Org. Lett.*, 2016, **23**, 6018.

- 
- [2] a) M. Ballester, J. Castañer, J. Riera, I. Taberner, *Tetrahedron Lett.*, 1977, **27**, 2353. b) K. Sugimoto, R. Hayashi, H. Nemoto, N. Toyooka, Y. Matsuya, *Org. Lett.*, 2012, **14**, 3510. c) A. Morri, Y. Thummala, V. Doddi, *Org. Lett.*, 2015, **17**, 4640.
- [3] J. Morris, C. Becker, F. Fronczek, W. Daly, M. McLaughlin, *J. Org. Chem.*, 1994, **59**, 6484.
- [4] Gaussian 09, Revision D.01, M. J. Frisch, G. W. Trucks, H. B. Schlegel, G. E. Scuseria, M. A. Robb, J. R. Cheeseman, G. Scalmani, V. Barone, B. Mennucci, G. A. Petersson, H. Nakatsuji, M. Caricato, X. Li, H. P. Hratchian, A. F. Izmaylov, J. Bloino, G. Zheng, J. L. Sonnenberg, M. Hada, M. Ehara, K. Toyota, R. Fukuda, J. Hasegawa, M. Ishida, T. Nakajima, Y. Honda, O. Kitao, H. Nakai, T. Vreven, J. A. Montgomery, J. E. Peralta, F. Ogliaro, M. Bearpark, J. J. Heyd, E. Brothers, K. N. Kudin, V. N. Staroverov, R. Kobayashi, J. Normand, K. Raghavachari, A. Rendell, J. C. Burant, S. S. Iyengar, J. Tomasi, M. Cossi, N. Rega, J. M. Millam, M. Klene, J. E. Knox, J. B. Cross, V. Bakken, C. Adamo, J. Jaramillo, R. Gomperts, R. E. Stratmann, O. Yazyev, A. J. Austin, R. Cammi, C. Pomelli, J. W. Ochterski, R. L. Martin, K. Morokuma, V. G. Zakrzewski, G. A. Voth, P. Salvador, J. J. Dannenberg, S. Dapprich, A. D. Daniels, Ö. Farkas, J. B. Foresman, J. V. Ortiz, J. Cioslowski, D. J. Fox, Gaussian, Inc., Wallingford CT, 2010.
